# Supplementary material
Source: PubMed Central journal article supplement (PMC9449796)

## Dexamethasone and oxygen support strategies in ICU patients with Covid-19 pneumonia

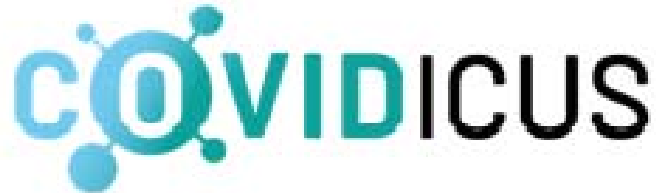

INTERVENTIONAL RESEARCH PROTOCOL INVOLVING HUMAN PARTICIPANTS  
CONCERNING A MEDICINAL PRODUCT FOR HUMAN USE

Version N°5 dated 12/11/2020

Project Code: APHP 200388 / EUDRACT no: 2020-001457-43

Coordinating Investigator:

Pr Jean-François TIMSIT  
Medical and infectious diseases ICU  
Bichat Hospital  
Tel. 01 40 25 77 03  
jean-françois.timsit@aphp.fr

Scientific Director:

Pr Lila BOUADMA  
Medical and infectious diseases ICU  
Bichat Hospital  
Tel. 01 40 25 77 03  
lila.bouadma@aphp.fr

Sponsor:

Assistance Publique – Hôpitaux de Paris (AP-HP)  
and by delegation: Délégation à la Recherche Clinique et à l'Innovation - DRCI  
Hôpital Saint-Louis  
1, avenue Claude Vellefaux  
75010 PARIS

Délégation à la Recherche Clinique et à l'Innovation –  
DRCI (Clinical Research and Innovation Department)  
Hôpital Saint Louis  
75010 PARIS

## CONTACT LIST

- Methodologist : Pr Sylvie Chevret  
Service de Biostatistique et information médicale  
Hôpital Saint-Louis  
1, avenue Claude Vellefaux  
Tel. 01 42 49 97 42 / Email sylvie.chevret@u-paris.fr
- Dr Charles BURDET  
Département d'Epidémiologie et Recherche Clinique (DEBRC)  
46 rue Henri Huchard, 75018 Paris  
tel: 01 40 25 79 42 / Email charles.burdet-ext@aphp.fr
- Sponsor: Délégation à la Recherche Clinique et à l'Innovation - DRCI  
Hôpital Saint-Louis  
1, avenue Claude Vellefaux  
DRCI-Head Office project advisor: Fadila AMERALI  
Tel. 01 44 84 17 17 / Email Fadila.amerali@aphp.fr
- Entity responsible  
for monitoring the study: URC (Clinical Research Unit) Paris Nord Val de Seine  
46 rue Henri Huchard, 75018 Paris  
DRCI-URC project advisor: Naima BELDJOUDI  
Tel. 01 40 25 79 62 / Email naima.beldjoudi@aphp.fr
- Safety contacts: Secteur Vigilance - DRCI  
Hôpital Fernand Widal  
200, rue du Faubourg Saint-Denis, 75475 PARIS  
Dr Sarra DALIBEY  
Tel : +33 (0)1 40 27 57 85, Email : sarra.dalibey@aphp.fr  
Hélène BROCVIELLE  
Tel : +33 (0)1 44 84 17 41, mail : helene.brocvielle@aphp.fr
- AGEPS contacts: Agence générale des équipements et produits de santé  
Département des essais cliniques  
7, rue du Fer à Moulin  
75005 – Paris  
Florence CAPELLE  
Tel : +33 (0)1 46 69 90 73, Email : florence.capelle@aphp.fr  
Céline ALLOUX  
Tel: +33 (0)1 46 69 90 73, mail : celine.alloux@aphp.fr

## SIGNATURE page for a research PROTOCOL

Research code number:

Title: "Dexamethasone and oxygen support strategies in ICU patients with Covid-19 pneumonia"

Version n°. 5 dated: 12/11/2020

The study will be carried out in accordance with the protocol, with current good practices and with statutory and regulatory requirements.

**Coordinating Investigator:**

Pr Jean-François TIMSIT  
Medical and infectious diseases ICU  
BICHAT Hospital  
Paris

Date: ...../...../.....  
Signature:

**Sponsor**

Assistance Publique – Hôpitaux de Paris  
Délégation à la Recherche Clinique et à  
l'Innovation - DRCI (Clinical Research and  
Innovation Department)  
Hôpital Saint Louis  
1 avenue Claude Vellefaux  
75010 PARIS

Date: ...../...../.....  
Signature:

# 1 SUMMARY

|                                     |                                                                                                                                                                                                                                                                                                                                                                                                                                                                                                                                                                                                                                                                                                                                                                                                                                                                                                                                                                                                                                                                                                                                                                                       |
|-------------------------------------|---------------------------------------------------------------------------------------------------------------------------------------------------------------------------------------------------------------------------------------------------------------------------------------------------------------------------------------------------------------------------------------------------------------------------------------------------------------------------------------------------------------------------------------------------------------------------------------------------------------------------------------------------------------------------------------------------------------------------------------------------------------------------------------------------------------------------------------------------------------------------------------------------------------------------------------------------------------------------------------------------------------------------------------------------------------------------------------------------------------------------------------------------------------------------------------|
| Full title                          | Dexamethasone and oxygen support strategies in ICU patients with Covid-19 pneumonia                                                                                                                                                                                                                                                                                                                                                                                                                                                                                                                                                                                                                                                                                                                                                                                                                                                                                                                                                                                                                                                                                                   |
| Acronym/reference                   | COVIDICUS                                                                                                                                                                                                                                                                                                                                                                                                                                                                                                                                                                                                                                                                                                                                                                                                                                                                                                                                                                                                                                                                                                                                                                             |
| Coordinating investigator           | Pr Jean-François TIMSIT                                                                                                                                                                                                                                                                                                                                                                                                                                                                                                                                                                                                                                                                                                                                                                                                                                                                                                                                                                                                                                                                                                                                                               |
| Scientific Director                 | Pr Lila BOUADMA                                                                                                                                                                                                                                                                                                                                                                                                                                                                                                                                                                                                                                                                                                                                                                                                                                                                                                                                                                                                                                                                                                                                                                       |
| Sponsor                             | Assistance Publique – Hôpitaux de Paris                                                                                                                                                                                                                                                                                                                                                                                                                                                                                                                                                                                                                                                                                                                                                                                                                                                                                                                                                                                                                                                                                                                                               |
| Scientific justification            | <p>The main manifestation of COVID-19 is acute hypoxemic respiratory failure (AHRF). In patients with AHRF, the need for invasive mechanical ventilation is associated with high mortality. Two hypotheses will be tested in this study.</p> <p>The first hypothesis is the benefit of high dose corticosteroid therapy on severe COVID-19 infection admitted in ICU in terms of survival.</p> <p>The second hypothesis is that, in the subset of patients free of mechanical ventilation at admission, either Continuous Positive Airway Pressure (CPAP) or High-Flow Nasal Oxygen (HFNO) allows to reduce intubation rate safely during COVID-19 related acute hypoxemic respiratory failure.</p>                                                                                                                                                                                                                                                                                                                                                                                                                                                                                   |
| Main objective and primary endpoint | <p>The main objective is to assess the impact of high-dose dexamethasone on overall mortality at day-60 after randomization in patients admitted in ICU for severe COVID-19 infection.</p> <p>In non mechanical ventilation (MV) patients, the additional objective is to assess whether oxygen support based on either HFNO or CPAP modality in COVID-19 related AHRF reduces the need for mechanical ventilation at day-28.</p>                                                                                                                                                                                                                                                                                                                                                                                                                                                                                                                                                                                                                                                                                                                                                     |
| Secondary objectives and endpoints  | <p>For the study of the effect of high-dose corticosteroids, secondary objectives include:</p> <ol style="list-style-type: none"> <li>1. To compare the evolution of the viral load in the respiratory tract</li> <li>2. To compare the occurrence of healthcare-associated infections</li> <li>3. To compare the exposition to mechanical ventilation</li> <li>4. To compare the evolution of SOFA score</li> <li>5. To compare the exposition to renal replacement therapy</li> <li>6. To compare the lengths of ICU and hospital-stay</li> </ol> <p>For the study of the effect of oxygen support modalities, secondary objectives are, to compare each of oxygen support group to the control group in terms of:</p> <ol style="list-style-type: none"> <li>1. To compare the overall survival</li> <li>2. To compare the exposition to mechanical ventilation</li> <li>3. To compare occurrence of severe hypoxemia during tracheal intubation</li> <li>4. To compare occurrence of cardiac arrest following tracheal intubation</li> <li>5. To compare the occurrence of healthcare-associated infections</li> <li>6. To compare the length of ICU and hospital-stay</li> </ol> |

|                                          |                                                                                                                                                                                                                                                                                                                                                                                                                                                                                                                                                                                                                                                                                                                                                                                                                                                                     |
|------------------------------------------|---------------------------------------------------------------------------------------------------------------------------------------------------------------------------------------------------------------------------------------------------------------------------------------------------------------------------------------------------------------------------------------------------------------------------------------------------------------------------------------------------------------------------------------------------------------------------------------------------------------------------------------------------------------------------------------------------------------------------------------------------------------------------------------------------------------------------------------------------------------------|
| Objective and endpoint Ancillary studies | <p>An ancillary study CACAO (Covidicus air contamination) will be performed in 4 centers aiming at assessing the environmental contamination by SARS-CoV-2 according to the oxygen support modality. Additional funding will be searched for these analyses (submitted for ANR call).</p> <p>An ancillary study will be performed for evaluating the long-term evolution of patients admitted in ICU for severe COVID-19 infection, using data from the SNDS.</p> <p>A metanalysis on individual data will be performed using patients enrolled in the 3 PHRC flash exploring the activity of corticosteroids.</p>                                                                                                                                                                                                                                                  |
| Design of the study                      | <p>The design will be stratified on patient severity;</p> <ul style="list-style-type: none"> <li>- In non-mechanically ventilated patients, a 2x2 factorial design will be used to assess the two interventions, separately. This will result in 6 treatment arms, additionally to the standard of care: <ol style="list-style-type: none"> <li>1- Standard oxygen and placebo of Dexamethasone</li> <li>2- Standard oxygen, and Dexamethasone</li> <li>3- CPAP and placebo of Dexamethasone</li> <li>4- CPAP and Dexamethasone</li> <li>5- HFNO and placebo of Dexamethasone</li> <li>6- HFNO, and Dexamethasone</li> </ol> </li> <li>- In mechanically ventilated patients, only 2 randomized groups will be constituted: <ol style="list-style-type: none"> <li>1- Placebo of high-dose Dexamethasone</li> <li>2- High dose Dexamethasone</li> </ol> </li> </ul> |
| Population of study participants         | <p>Adult patient with COVID-19 acute hypoxemic respiratory failure (AHRF)</p>                                                                                                                                                                                                                                                                                                                                                                                                                                                                                                                                                                                                                                                                                                                                                                                       |
| Inclusion criteria                       | <ol style="list-style-type: none"> <li>1. Age <math>\geq</math> 18 years</li> <li>2. Admitted to ICU within 48 hours</li> <li>3. Confirmed or highly suspected COVID-19 infection</li> <li>4. Acute hypoxemic respiratory failure (PaO<sub>2</sub> &lt;70 mmHg or SpO<sub>2</sub>&lt;90% on room air or tachypnea&gt;30/min or labored breathing or respiratory distress; need for oxygen flow <math>\geq</math>6L/min)</li> <li>5. Any treatment intended to treat the SARS-CoV-2 infection if accessible, in the absence of contraindications (either as a compassionate use or in the context of a clinical trial, i.e remdesivir, lopinavir/ritonavir, favipiravir, hydroxychloroquine and any other new drug with potential activity).</li> </ol>                                                                                                              |

|                                                        |                                                                                                                                                                                                                                                                                                                                                                                                                                                                                                                                                                                                                                                                                                                                                                                                                                                                                                                                                                                                                                                                                                      |
|--------------------------------------------------------|------------------------------------------------------------------------------------------------------------------------------------------------------------------------------------------------------------------------------------------------------------------------------------------------------------------------------------------------------------------------------------------------------------------------------------------------------------------------------------------------------------------------------------------------------------------------------------------------------------------------------------------------------------------------------------------------------------------------------------------------------------------------------------------------------------------------------------------------------------------------------------------------------------------------------------------------------------------------------------------------------------------------------------------------------------------------------------------------------|
| Exclusion criteria                                     | <ol style="list-style-type: none"> <li>1. Moribund status</li> <li>2. Pregnancy or breastfeeding</li> <li>3. Long term corticotherapy at a dose of 0.5mg/kg/j or higher</li> <li>4. Active and untreated bacterial, fungal or parasitic infection</li> <li>5. Not written informed consent from the patient or a legal representative if appropriate. If absence a legal representative the patient may be included in emergency procedure</li> <li>6. Hypersensitivity to dexamethasone or to any of the excipients</li> <li>7. Not Affiliation to the French social security</li> </ol>                                                                                                                                                                                                                                                                                                                                                                                                                                                                                                            |
| Investigational medicinal product(s)                   | <ul style="list-style-type: none"> <li>- High dose Dexamethasone IV (14mg D1-D5 then 4mg D6-D10)</li> <li>- HFNO</li> <li>- CPAP</li> </ul>                                                                                                                                                                                                                                                                                                                                                                                                                                                                                                                                                                                                                                                                                                                                                                                                                                                                                                                                                          |
| Comparator treatment                                   | <ul style="list-style-type: none"> <li>- Placebo of high-dose Dexamethasone</li> <li>- Standard oxygen</li> </ul>                                                                                                                                                                                                                                                                                                                                                                                                                                                                                                                                                                                                                                                                                                                                                                                                                                                                                                                                                                                    |
| Expected benefits for the participants and for society | <p>Optimal care according to the current knowledge that will be updated according to new results for all the patients that will be enrolled (see below).</p> <p>Expected benefit in term of need of intubation, organ failures free days and survival.</p>                                                                                                                                                                                                                                                                                                                                                                                                                                                                                                                                                                                                                                                                                                                                                                                                                                           |
| Risks and burdens added by the study                   | <p>The use of high flow oxygenation is associated with a theoretical increased risk in the aerosolized particles. The rooms will be maintained in negative or null pressure and health care workers will be equipped with FFP2 face masks and specific clothes according to guidelines.</p> <p>All patients will receive Dexamethasone at the daily dose of 6 mg, as recommended by the Haut Conseil de Santé Publique in France on July, 23,2020. Dexamethasone may theoretically prolong the viral shedding of COVID-19 and a systematic monitoring of rt PCR is planned. All patients will receive an antiviral therapy (as part of routine care) that is active in vitro on coronaviruses, unless contraindications. Dexamethasone may increase the risk of superinfections. This risk will be prevented by early diagnostic procedure use according to current guidelines.</p> <p>Dexamethasone may also increase the risk of hyperglycemia with the need of insulin. Close monitoring of glycemia will therefore be performed to detect those events.</p> <p>The risk level of the study D</p> |
| Practical implementation                               | <p>During this baseline visit, the intensivist investigator in charge of the patient will provide full information of patients or their relative or support person.</p> <p>All consecutive patients with a Confirmed or highly suspected COVID-19 infection will be considered for eligibility. They will be included by the investigating physician if they meet all the inclusion criteria and none of the exclusion criteria.</p> <p>The patient will be randomized in one of treatment groups according to the procedure, in addition to the standard of care:</p> <ul style="list-style-type: none"> <li>- For study effect of high-dose corticosteroids <ul style="list-style-type: none"> <li>o In the experimental group: dexamethasone 14mg</li> <li>o In the control group: Placebo of 14mg Dexamethasone</li> </ul> </li> <li>- For study effect of oxygen support modality <ul style="list-style-type: none"> <li>o HFNO</li> </ul> </li> </ul>                                                                                                                                          |

|                                                      |                                                                                                                                                                                                                                                                                                                                                                                                                                                                                                                                                                                                                                                                                                                                                                                                                                                                                                                                                                                                                                                                                                                                                   |
|------------------------------------------------------|---------------------------------------------------------------------------------------------------------------------------------------------------------------------------------------------------------------------------------------------------------------------------------------------------------------------------------------------------------------------------------------------------------------------------------------------------------------------------------------------------------------------------------------------------------------------------------------------------------------------------------------------------------------------------------------------------------------------------------------------------------------------------------------------------------------------------------------------------------------------------------------------------------------------------------------------------------------------------------------------------------------------------------------------------------------------------------------------------------------------------------------------------|
|                                                      | <ul style="list-style-type: none"> <li>○ CPAP</li> <li>○ Standard oxygen therapy</li> </ul> <p>Patients will be evaluated daily while hospitalized in the ICU until D60.</p>                                                                                                                                                                                                                                                                                                                                                                                                                                                                                                                                                                                                                                                                                                                                                                                                                                                                                                                                                                      |
| Number of participants included                      | 550 (including 330 MV patients)                                                                                                                                                                                                                                                                                                                                                                                                                                                                                                                                                                                                                                                                                                                                                                                                                                                                                                                                                                                                                                                                                                                   |
| Number of centres                                    | 19 sites in France                                                                                                                                                                                                                                                                                                                                                                                                                                                                                                                                                                                                                                                                                                                                                                                                                                                                                                                                                                                                                                                                                                                                |
| Duration of the study                                | <ul style="list-style-type: none"> <li>- inclusion period: 12 months</li> <li>- participation period (treatment + follow-up):75 days</li> <li>- total duration: 14,5 months</li> </ul>                                                                                                                                                                                                                                                                                                                                                                                                                                                                                                                                                                                                                                                                                                                                                                                                                                                                                                                                                            |
| Number of enrolments expected per site and per month | 2,4 patients per site and per month                                                                                                                                                                                                                                                                                                                                                                                                                                                                                                                                                                                                                                                                                                                                                                                                                                                                                                                                                                                                                                                                                                               |
| Statistical analysis                                 | <p>All primary analyses of the high-dose corticosteroids and oxygen support, will be performed under the intention-to-treat (ITT principle), irrespective of the actual treatment of each enrolled patient who will be each analysed in the group that has been attributed by randomization.</p> <p>Estimation of high-dose Dexamethasone effect will be based on the direct comparison of the two randomization arms in the ITT population. Estimation of the effect of the oxygenation, support systems, will be considered separately: HFNO versus standard oxygen, CPAP versus standard oxygen, with control for multiple comparisons based on Bonferroni adjustment.</p> <p>Estimation of treatment by period interaction will be performed, given the modification of the standard of care in September, 2020. Last, estimation of the dexamethasone effect will be performed on the “as treated population”, distinguishing the actual dose levels (0, 6, and 20 mg), based on instrumental variable methods.</p> <p>Interim analyses will use Bayesian monitoring after every 50 patients in order to avoid inflation of type I error</p> |
| Funding sources                                      | National PHRC 2020 Ministry of Health                                                                                                                                                                                                                                                                                                                                                                                                                                                                                                                                                                                                                                                                                                                                                                                                                                                                                                                                                                                                                                                                                                             |
| Study will have a Data Safety Monitoring Board       | Yes                                                                                                                                                                                                                                                                                                                                                                                                                                                                                                                                                                                                                                                                                                                                                                                                                                                                                                                                                                                                                                                                                                                                               |

## **2 SCIENTIFIC JUSTIFICATION FOR THE STUDY**

### **2.1 Hypothesis for the study**

Two hypotheses will be tested in this study.

The first hypothesis is the benefit of corticosteroid therapy on severe COVID-19 infection admitted in ICU in terms of survival.

The second hypothesis is that, in the subset of patients free of mechanical ventilation at admission, either CPAP or HFNO allows to reduce intubation rate safely during COVID-19 related acute hypoxemic respiratory failure.

### **2.2 Description of knowledge relating to the condition in question**

In December 2019, the Wuhan Municipal Health Committee identified an outbreak of viral pneumonia cases of unknown cause. Coronavirus RNA was quickly identified in some of these patients. This novel coronavirus has been designated SARS-CoV-2, and the disease caused by this virus has been designated COVID-19. Currently there is no approved therapeutic agent or supportive treatment for coronavirus infection. We design a study to evaluate in patients infected with SARS-CoV-2 the impact on patients' outcomes of one therapeutic agent in addition to standard of care of in date of July, 2020 (Dexamethasone, 6 mg) and antiviral treatment: High-dose dexamethasone [Randomization (R)-DXM] and one oxygen supportive treatment [R-O2], i.e. High-Flow Nasal Oxygen (HFNO) or Continuous Positive Airway Pressure (CPAP).

The main manifestation of COVID-19 is acute hypoxemic respiratory failure (AHRF). In patients with AHRF, the need for invasive mechanical ventilation is associated with high mortality. HFNO is a non-invasive, high concentration oxygen delivery interface that has been increasingly used in critically ill adults over the last number of years. During HFNO, heated and humidified oxygen is delivered to the nose at flow rates as high as 50-60 L/minute, allowing clinicians to better match the inspiratory demands of patients with AHRF. These high flow rates also generate low levels of positive pressure in the upper airways, and the fraction of inspired oxygen (FiO<sub>2</sub>) can be adjusted by changing the fraction of oxygen in the driving gas. The high flow rates may also decrease physiological dead space by flushing expired carbon dioxide from the upper airway, a process that potentially explains the observed decrease in the work of breathing (1). HFNO has been shown to result in better comfort and oxygenation than standard oxygen therapy delivered through a face mask in patients with AHRF (2). In a study conducted in patients with AHRF, HFNO achieved better survival as compared to standard oxygen and non-invasive ventilation (NIV) (3). However, its high gas flow raises concerns about aerosolization of infectious particles and spread of



infection. Although clear data are lacking for SARS-CoV-2, experimental confirmation of viral aerosol generation was demonstrated in a patient with SARS coronavirus.

CPAP is a simple to use and affordable technique for non-invasive ventilatory support. In patients with AHRF, applying a positive pressure to the airway opening has been shown to mitigate the reduction in functional residual capacity and to improve respiratory mechanics and gas exchange (4), with early physiologic improvement (5). The Boussignac CPAP device (Vygon, Ecouen, France) is easy to use, compatible with all face masks and does not need any ventilator to work. Pressure is generated by a standard gas flow passing through micro-capillaries (located all around the CPAP device) increasing its speed and generating turbulence therefore creating a "virtual valve". This technique offers multiple advantages for respiratory support and can be adapted with the insertion of a heated and mixture exchanger for use in COVID-19 patients (6).

To our knowledge, the effect of CPAP or HFNO on major outcomes have not been assessed in adults with COVID-19 related AHRF. We chose not to assess NIV, i.e., bi-level assistance delivered by ventilators because this technique requires adequate training and a mechanical ventilator, which may be challenging in the context of an epidemics. In addition, recent reports suggest that this approach may be associated with excessive tidal volumes during AHRF (7), the latter being potentially involved in patient-self-inflicted lung injury (8). Recent studies do not suggest any benefit of NIV during de novo AHRF (3) and the 2017 European Respiratory Society/American Thoracic Society NIV clinical practice guideline made no recommendation regarding the use of NIV for acute de novo respiratory failure (9). This impact study of oxygen support on patient outcomes will be combined and completed by an ancillary study CACAO to assess whether the use of HFNO, or CPAP, as compared to standard oxygen therapy increases the risk of environmental contamination of air or surfaces during the care of patients with Covid-19 (ANR call).

The place of steroids is of paramount importance in patients suffering from viral pneumonia related to COVID-19. Indeed, a worsening of the lung injury is described around Day 8 and (10,11) paradoxically at the same time that a decrease of the viral load. The lung damage at this phase could be related to immunopathological lesions, resulting from an overexuberant pro-inflammatory host response, rather than uncontrolled viral replication, as suggested by the description of Huang and al., suggesting that a cytokine proinflammatory storm was associated with disease severity. A cohort study from Wuhan (12) showed a benefit of the use of steroids in patients with severe COVID-19 infections. The hazard of mortality associated with corticosteroid use was hazard ratio 0.38; 95%CI, 0.20-0.72; P = .003. Despite this potential benefit, the use of corticosteroids have been associated with extended duration of MERS-COV shedding.

Our hypotheses are that the use of HFNO or CPAP might reduce the need for mechanical ventilation and that steroids can reduce mortality of severe COVID-19 patients. We will use dexamethasone as successfully used in acute respiratory distress syndrome (ARDS) (13).

Integrating clinical trials of experimental therapeutics as part of the response during COVID-19 pandemics is urgently required to try to save the most severe forms and determining efficacy of potential therapies. The purpose of this randomized trial is to provide substantial evidence on the efficacy, or lack of efficacy and safety of steroids and HFNO or CPAP given the expected large number of cases.

### 2.3 Summary of relevant pre-clinical experiments and clinical trials

According to the data discussed below, there is a rationale for both interventions:

- The inflammasome activation associated with COVID-19 is now experimentally demonstrated (14). Clinical data clearly demonstrated that the pro-inflammatory parameters are associated with poor prognosis in severe COVID-19 pneumonia (15). Finally, recent study showed that in non-COVID-19 ARDS, dexamethasone decrease significantly the D28 and day 60 mortality. All these data argued for a potential benefit of corticosteroids, mainly Dexamethasone in severe COVID-19 pneumonia.
- A specific system of oxygen delivery to decrease the need of intubation requirement. In COVID-19 infections admitted in ICU, the risk of mortality associated with ARDS and intubation is 55-90%. Preliminary data suggest that HFNO trends to reduce the need for invasive ventilation in immune-compromized patients (16). CPAP has been associated with a decrease of the need of invasive mechanical ventilation in acute respiratory failures associated with *Pneumocystis carinii* pneumonia. Although causality is not demonstrated, any attempt to reduce the need for intubation may therefore reduce the risk of death.
- Recovery study: Preliminary data was published 16 June 2020 by University of Oxford concerning use of Dexamethasone to reduce death in hospitalised patients with severe respiratory complications of COVID-19.

In March 2020, the RECOVERY (Randomised Evaluation of COVid-19 thERapY) trial was established as a randomised clinical trial to test a range of potential treatments for COVID-19, including low-dose dexamethasone (a steroid treatment). Over 11,500 patients have been enrolled from over 175 NHS hospitals in the UK. On 8 June 2020, recruitment to the dexamethasone arm was halted since, in the view of the trial Steering Committee, sufficient patients had been enrolled to establish whether or not the drug had a meaningful benefit. A total of 2,104 patients were randomized to receive dexamethasone 6 mg once per day (either per os or intravenously) for 10

days in addition to standard of care, compared to 4,321 patients randomized to usual care.

Among the patients who received the usual care alone, 28-day mortality was expectedly the highest in those who required ventilation (41%), intermediate in those who required oxygen supply (25%), and the lowest among those who did not require any oxygen supply (13%). Based on subset analyses, the effect of dexamethasone appeared to depend on the population, with a 35% reduced death rate in ventilated patients (rate ratio, 0.65 [95% confidence interval 0.48 to 0.88];  $p=0.0003$ ), a one fifth reduction in those receiving oxygen only (0.80 [0.67 to 0.96];  $p=0.0021$ ), while there were no benefit among patients who did not require any oxygen supply (rate ratio, 1.22 [0.86 to 1.75];  $p=0.14$ ).

## **2.4 Description of the population to be studied and justification for the choice of participants**

The population enrolled are detailed in the Eligibility criteria in section 6.

As stated above, published data argued for a potential benefit of corticosteroids, mainly Dexamethasone in severe COVID-19 pneumonia. Therefore, this study focuses on the population of COVID-19 pneumonia with acute respiratory failure. Given the potential increase in the viral shedding described with other coronavirus, the Dexamethasone will be always associated with a molecule with *in vitro* antiviral activity against SARS-CoV-2.

In the subset of no mechanically ventilated patients, the prognosis depends on the severity of pneumonia, resulting in more than 50% of the cases with a further need of mechanical ventilation. This justifies our attempt to additionally assess in this subset the benefit of oxygenation strategies, unless patients had chronic obstructive pulmonary disease or hypercapnia that may justify NIV.

## **2.5 Identification and description of the investigational medication or medications**

There are two interventions to be simultaneously studied and compared in addition to the standard of care:

- 1) For all patients, the intervention consists in the IV administration of dexamethasone 14 mg / 3,5 ml (D1-D5), then 4 mg / 1 ml D6-D10. The comparator arm will receive NaCl 0,9% as placebo of dexamethasone, 3,5 ml (D1-D5), then 1 ml D6-D10; all patients whatever the group will receive a therapy effective *in vitro* against SARS-CoV-2.

2) In the subset of patients without (i) invasive mechanical ventilation, (ii) anatomical factors precluding the use of nasal cannula, (iii) hypercapnia indicating NIV ( $\text{paCO}_2 \geq 50$  mmHg) OR (iv) intolerance to one of the 3 modes of oxygenation studied at admission, two oxygen support interventions will be further considered, either HFNO or CPAP, randomly allocated, and started within the hour after randomization. The comparator arm will receive standard oxygen therapy. Note that to avoid any increased risk of contamination for the health care teams in charge of the patient, such oxygenation supports will be performed in rooms in negative or null pressure. Healthcare workers will be equipped systematically with FFP2 face mask and specific materials as described (17) (see section 8.1.1).

## **2.6 Description and justification of the dosage, route of administration, administration schedule and treatment duration**

See Section 8 for further information about the administration of product.

## **2.7 Summary of the known and foreseeable benefits and risks for the research participants**

The COVID-19 epidemic is currently expanding in France and throughout the world. Approximately 15-20% of hospitalized infected patients are admitted in the ICU due to a respiratory failure. About two third of the ICU patients will required invasive mechanical ventilation with estimated death rate of 50-90%. A growing literature suggest that this worsening might be due to an increased inflammatory state of the lung targeted by COVID-19. This trial will allow (1) to demonstrate the potential benefit of high-dose dexamethasone in COVID-19 acute respiratory failure and (2) to identify the best modality for oxygen support, including for the security of healthcare workers, as HFNO has been associated with a higher aerosolization of respiratory pathogen (ancillary study CACAO), as well as to improve the management of the lung disease, aside antiviral therapy and standard of care. This will lead to direct benefits both to the included patients and the society in the fight against COVID-19 epidemics.

# **3 OBJECTIVES**

## **3.1 Primary objective**

For the study of the effect of corticosteroids: The main objective is to assess the impact of high-dose dexamethasone on overall mortality at day-60 after randomization in patients admitted in ICU for severe COVID-19 infection.

For the study of the effect of oxygen support modality: The main objective is to assess whether oxygen support based on either HFNO or CPAP modality in COVID-19 related acute hypoxemic respiratory failure reduces the need for mechanical ventilation at day-28.

### **3.2 Secondary objectives**

For the study of the effect of high-dose corticosteroids, secondary objectives include:

1. To compare the evolution of the viral load in the respiratory tract
2. To compare the occurrence of healthcare-associated infections
3. To compare the exposition to mechanical ventilation
4. To compare the evolution of SOFA score
5. To compare the exposition to renal replacement therapy
6. To compare the lengths of ICU and hospital-stay

For the study of the effect of oxygen support modalities, secondary objectives are, to compare each of oxygen support group to the control group in terms of:

1. To compare the overall survival
2. To compare the exposition to mechanical ventilation
3. To compare occurrence of severe hypoxemia during tracheal intubation
4. To compare occurrence of cardiac arrest following tracheal intubation
5. To compare the occurrence of healthcare-associated infections
6. To compare the length of ICU and hospital-stay

### **3.3 Objective of ancillary studies**

#### **3.3.1 CACAO (Covidicus air contamination)**

An ancillary study CACAO will be performed in 4 centers aiming at assessing the environmental contamination by SARS-CoV-2 according to the oxygen support modality. Additional funding will be searched for these analyses (submitted for ANR call).

#### **3.3.2 Long term evolution**

An ancillary study will be performed for evaluating the long-term evolution of patients admitted in ICU for severe COVID-19 infection, using data from the SNDS.

#### **3.3.3 Comparison study of thrombo-inflammation parameters**

COVID19 is associated with a critical thrombo-inflammatory state that can be rapidly deleterious, leading to organ injury, including lung, kidney and brain. Therefore, the main known cellular actors involved in thrombo-inflammation and their related soluble parameters

are good candidate biomarkers that could be associated with poor prognosis and their study could also help us to better understand the pathophysiology of this disease.

We hypothesize that studying all these parameters sequentially in ICU patients will allow us to identify relevant parameters associated with poor prognosis.

## **4 STUDY DESIGN**

### **4.1 Study endpoints**

#### **4.1.1 Primary endpoint**

For the study of the effect of high-dose corticosteroids, the primary endpoint is the time-to-death from all causes within the first 60 days after randomization.

For the study of the effect of oxygen support modalities, the primary endpoint is the time to need for mechanical ventilation (MV), as defined by any of the 3 criteria for intubation defined below, within the first 28 days after randomization. The use of those criteria rather than actual mechanical ventilation was justified to decrease information bias due to (i) the open design, (ii) possibility of delayed MV due to logistic constraints, and (ii) do not resuscitate orders (DNR).

The **pre-specified criteria for intubation** have been used previously (3):

- 1) signs of persisting or worsening respiratory failure, defined by at least two of the following criteria: a respiratory rate above 35 cycles/min, lack of improvement of signs of respiratory-muscle fatigue, development of copious tracheal secretions, acidosis with a pH below 7.35, SpO<sub>2</sub> below 90% despite FiO<sub>2</sub> ≥80% for more than 5 min without technical dysfunction, or intolerance to NIV; or one of the following
- 2) hemodynamic instability defined by a systolic blood pressure below 90 mmHg, mean blood pressure below 65 mmHg or requirement for vasopressor,
- 3) deterioration of neurologic status with a Glasgow coma scale below 12 points.

#### **4.1.2 Secondary endpoints**

For the study of the effect of high-dose corticosteroids, secondary endpoints include:

1. The cycle threshold for SARS-CoV-2 PCR at baseline, day 7+/-1 and day 10+/-1 in samples of the same origin (preferably subglottic i.e. bronchoalveolar lavage or tracheal aspiration, otherwise nasopharyngeal swab)
2. Proportion of patients with at least one episode of any healthcare-associated infection between randomization and D28
3. Number of days alive without mechanical ventilation at day 28

4. Changes in SOFA score from day 1 to day 3, day 7, day 10, day 21, day 28 or discharge-day from ICU as appropriate
5. Number of days alive without renal replacement therapy at day 28
6. Lengths of ICU-stay and hospital-stay

For the study of the effect of oxygen support modality, secondary endpoints are:

1. Overall survival within 60 days after randomization
2. Number of days alive without invasive mechanical ventilation at day 28
3. Proportion of patients with severe hypoxemia, which is defined as an oxygen saturation of less than 80% during the same interval during the interval between induction and 2 minutes after tracheal intubation
4. Proportion of patients with cardiac arrest within 1 hour after intubation
5. Proportion of patients with at least one episode of any healthcare-associated infection between randomization and day 28
6. Lengths of ICU-stay and hospital-stay

#### **4.1.3 Endpoints for the ancillary studies**

The endpoint for the ancillary study CACAO (Covidicus Air ContAminatiOn) is the concentration of SARS-CoV-2 in the patient's room ambient air and surfaces.

The endpoints for the ancillary study on the long-term evolution are the consumption of care in the outpatient setting, as well as hospital episodes and possible entry in the register of Affections de Longue Durée, and vital status.

For the ancillary study of thrombo-inflammation parameters, in all patients, we will compare thrombo-inflammation parameters at D1 D7 D outcome as mentioned below:

- Blood cell count and coagulation parameters (PT, APTT, fibrinogen, FV FII, fibrin monomers D-dimers, FVIII:C, anti-Xa activity)
- Platelet activation markers (P-selectin, TLT-1, platelet-leucocytes aggregates)
- Lymphocyte monocyte and neutrophil activation phenotype and mediator release, netosis capacity (CXCL10, MCP-1, IL6, IL8, TNF alpha, IL-1beta, NETs).
- Functional assays (cytokine secretion by both lymphoid and myeloid cells, neutrophil priming and degranulation)

## **4.2 Description of research methodology**

### **4.2.1 Design of the study**

This will be a multicenter randomized controlled trial stratified on the patient severity at inclusion (Figure 1).



All consecutive patients with COVID-19 infection admitted in ICU, receiving the best standard of care including low-dose dexamethasone (see below) and any therapy for the treatment of their COVID-19 infection (either as a compassionate use or in the context of a clinical trial, i.e remdesivir, lopinavir/ritonavir, favipiravir, hydroxychloroquine and any other new drug with potential activity) and who met the eligibility criteria will be proposed to participate.

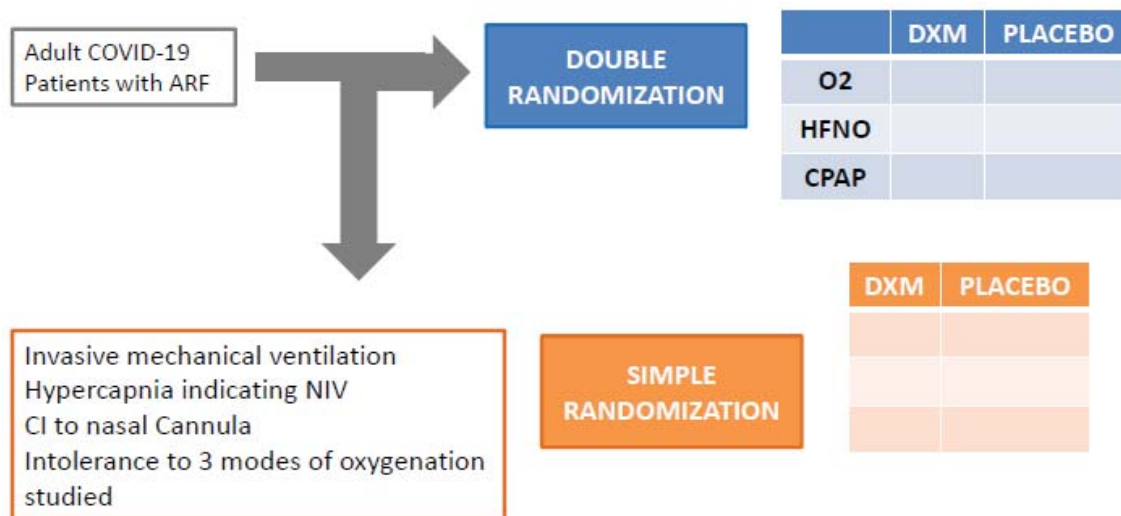

Figure 1: Design of the protocol: Stratification of the randomization according to the patient severity; DXM: dexamethasone

The design will be stratified on patient severity;

- In patients without (i) invasive mechanical ventilation, (ii) anatomical factors precluding the use of nasal cannula, (iii) hypercapnia indicating NIV ( $\text{paCO}_2 \geq 50 \text{ mmHg}$ ) OR (iv) intolerance to one of the 3 modes one of oxygenation studied at admission, a 2x2 factorial design will be used to assess the two interventions, separately. This will result in 6 treatment arms
  - 1- Standard oxygen and placebo of high-dose dexamethasone
  - 2- Standard oxygen, and high-dose dexamethasone
  - 3- CPAP and placebo of high-dose dexamethasone
  - 4- CPAP, and high-dose dexamethasone
  - 5- HFNO and placebo of high-dose dexamethasone
  - 6- HFNO and high-dose dexamethasone
- In patients with (i) invasive mechanical ventilation, (ii) anatomical factors precluding the use of nasal cannula, (iii) hypercapnia indicating NIV ( $\text{paCO}_2 \geq$



**50 mmHg) OR (iv) intolerance to one of the 3 modes one of oxygenation studied at admission**, only 2 randomized groups will be constituted:

- 1- Placebo of high-dose dexamethasone
- 2- high-dose dexamethasone

Dexamethasone and placebo will be administered IV (14mg/3,5ml D1-D5 then /1ml D6-D10)  
Randomization will be stratified on center.

The conception of a dexamethasone placebo is not possible due to the emergency to begin the trial. Sponsor will provide pre randomized boxes including all necessary masked vials of dexamethasone or normal saline.

All patients will receive the best **standard of care** available at the time. Based on the *Haut Conseil de Santé Publique* (July, 23, 2020), dexamethasone will be administered at a daily dosage of 6 mg for a maximum of 10 days, after evaluation of the individual benefit/risk ratio in patients under 70 years of age requiring oxygen and resuscitation. This results in a pragmatic trial comparing dexamethasone 6mg +14mg of vs dexamethasone 6mg + placebo. Thus, the protocol focuses on the effect of high-dose dexamethasone compared to low-dose..

There will be a continuous Bayesian monitoring to allow early stopping for efficacy or safety (See section 13 for more details). An independent data and safety monitoring board (DSMB) will actively monitor interim data to make recommendations about early study closure or changes to study arms.

For the High Flow Oxygen and standard oxygen groups, a trial of NIV will be allowed according to the physician's preference in patients with signs of persisting or worsening respiratory failure and no other organ dysfunction before performing endotracheal intubation and invasive ventilation.

For MV patients, weaning decisions will follow strict standardized criteria, identical in all randomization groups, according to applicable recommendations. These standardized weaning criteria will be collected every day for each randomized patient and are:

- No further need for sedative agents,
- Good level of consciousness with little or no sedation,
- No further need for significant use of vasopressors or inotropes,
- Fraction of inspired oxygen (FiO<sub>2</sub>) ≤ 50% with oxygen saturation (SaO<sub>2</sub>) ≥ 88%,

- Positive End Expiratory Pressure (PEEP)  $\leq$  8 cmH<sub>2</sub>O with SaO<sub>2</sub>  $\geq$  88%.

Follow-up of participants will be the same for all participants. Clinical data for efficacy will be assessed daily in the ICU, and on days 7, 10, 14, 21, 28, 60 for patients who will be transferred to other hospital-wards at these dates. Safety data will be collected every day during therapy, and every week until day 28 after the end of treatment. A biocollection will be constituted with all BAL samples collected as part of care and blood samples at day 1, 7, 10, 14, 28.

In addition, ancillary study CACAO (Covidicus Air ContAminatiOn) will be performed in 4 centers with collection of air of the patient's room for the analysis of the SARS-CoV-2 eventual dissemination depending on oxygen support modality. Additional funding will be searched for these analyses (submitted for ANR call).

In addition, although the request for access to SNDS data is subject to separate formalities in a separate protocol (with a request for an opinion from CEREES and then a request for authorisation from the CNIL), it should nevertheless be specified here that the collection of the NIR will be carried out within the framework of this research protocol. In concrete terms, the participant's NIR will be collected from his or her medical file and recorded on a contact sheet specifically dedicated to its collection.

#### **4.2.2 Number of participating sites**

This is a multicenter trial with 19 participating centres.

Participating centers and investigators are detailed in the addenda "investigators list" separated of the protocol.

#### **4.2.3 Identification of participants**

The participants in this research will be identified as follows:

Site number. (3 digits) - Sequential enrolment number for the site including the strata number (4 digits, beginning with 1001 or 2001, respectively) - surname initial - first name initial

This reference number is unique and will be used for the entire duration of the study.

#### **4.2.4 Randomisation**

After signing the informed consent (or according to the emergency inclusion), and checking the eligibility criteria, including the severity strata, patients will be randomized across the arms (as detailed above in section 5.2.1).

Randomization will be balanced (1:1:1 in non-MV patients, 1:1 in MV patients), centralized, and stratified on centre. Computer-generated randomization lists will be generated, using permutation blocks of varying sizes that will be kept confidential to the investigators. The randomization lists will be generated by a statistician from Saint Louis hospital (sbim). All these points will insure the allocation concealment of the randomization process.

A centralized 24/24, password-protected Internet service (CleanWeb® solution) expressly designed for the study and developed under the responsibility of the URC Paris Nord, will be used. Information will be recorded in the electronic system in order to prevent the investigator and medical team from predicting the group allocated to patients. To include and randomize a patient in the study, investigators will access the website using an individual password, and fill out a short medical record form. After each randomization, a treatment number is allocated to the patient and a confirmation email of randomization will be sent automatically to the investigator concerned and the URC Paris Nord.

#### **4.2.5 Blinding methods and measures put in place to protect blinding**

The conception of a placebo is not possible due to the emergency to begin the trial for Dexamethasone, or due to the nature of intervention for the oxygen support modalities. Pre randomized boxes containing masked vials dexamethasone or normal saline will be available in each center. These precautions and the use of primary endpoints (mortality within day 60, or specific criteria for MV) will minimize the risk of biases due to the open nature of the study (see section 4.2.1).

Statistical analyses will be conducted blinded to treatment assignment, with treatment arms denoted by letters instead of explicit labelling; note that the control arm of oxygenation support will be identified for analysis purposes (given only comparison of each intervention to that control arm is to be performed). All investigators will be unaware of aggregate outcomes during the study.

#### **4.2.6 Unblinding procedures, if applicable**

Unblinding will be requested for any reason considered essential by the investigating physician by calling upon:

- **In all cases** at the poison control centre at Fernand Widal Hospital, Telephone: **+33 (0)1 40 05 48 48**

## 5 IMPLEMENTATION OF THE STUDY

### 5.1 Baseline visit

#### 5.1.1 Obtaining informed consent

Subjects will receive a concise and focused presentation of key information about the clinical trial, verbally and with a written consent form. The key information about the study will be organized and presented in lay terminology and language that facilitates understanding why one might or might not want to participate.

For patients who are not able to sign the informed consent form, the consent of a relative or support person will be required, if they are present. Emergency inclusions will be allowed in this research protocol in accordance to the French Public Health Code, article L1122-1-2.

The relative or support person and the concerned person will be informed as soon as possible and a new consent will be required for the pursuit of this research. The relative or support person and the concerned person may also oppose to the use of his data in the research. See chapter 15.1 for more details.

A patient card will be completed and given to the patient, or kept in the medical file and will be given to him as soon as possible.

A free and written informed consent form must be signed by each individual participating in the trial prior to any act carried out by the research protocol.

| Whose consent must be obtained                    | Who informs the individuals and collects their consent                                    | At what point the individuals are informed                                                                     | At what point the consent is obtained                                                                          |
|---------------------------------------------------|-------------------------------------------------------------------------------------------|----------------------------------------------------------------------------------------------------------------|----------------------------------------------------------------------------------------------------------------|
| 1. The patient<br>2. A relative or support person | • the principal investigator or collaborating physician declared and trained in the study | 1. Baseline visit<br>2. As soon as possible if the patient is included under the emergency inclusion procedure | 1. Baseline visit<br>2. As soon as possible if the patient is included under the emergency inclusion procedure |

#### 5.1.2 Required clinical, biological and radiological exams

During this visit, the intensivist investigator in charge of the patient will provide full information of patients or their relative or support person (see 5.1.1 about obtaining consent). All consecutive patients with a Confirmed or highly suspected COVID-19 infection will be considered for eligibility. They will be included by the investigating physician if they meet all the inclusion criteria and none of the exclusion criteria. For eligible patients not included in the study, the reason for non-inclusion will be compiled.

Inclusion and non-inclusion criteria will be assessed and collected in the CRF.

This visit will include:

- Detailed interview of the patient or his/her relatives on his/her demographic data, medical history and current medications
- Complete physical exam, including vital parameters and respiratory rate
- Blood sampling for standard biology
- Data for SOFA scoring
- SARS-CoV-2 PCR (preferably subglottic sample i.e. bronchoalveolar lavage or tracheal aspiration, otherwise nasopharyngeal swab)
- Blood  $\beta$ -HCG test for women of child-bearing age

The patient will be randomized in one of treatment groups according to the procedure described in chapter 4.2.4:

- For study effect of corticosteroids
  - o In the experimental group: high-dose dexamethasone
  - o In the control group: placebo of high-dose dexamethasone
- For study effect of oxygen support modality
  - o HFNO
  - o CPAP
  - o Standard oxygen therapy

To limit the risk of loss to follow-up, the contact details of patients, his/her surrogates and their primary care physician will be collected at inclusion on a report form. This form will be not conserved after termination of the study.

Treatment will then be initiated according to the protocol exposed in chapter 7.

The following data will be collected on inclusion by the investigator in charge of the patient:

- Inclusion and non-inclusion criteria
- Standard demographic information: patient's initials, gender, date of birth and the birth place
- Social Security number (NIR)
- Significant comorbidities and baseline characteristics including treatments administered
- Date of admission to hospital and date and time of admission to ICU
- Previous location before admission in the ICU: emergency room / home / medical or surgical ward / another ICU
- Reason for ICU admission: respiratory
- Presence of the following comorbid conditions (Y/N): chronic respiratory insufficiency requiring long-term oxygen therapy, heart failure (New York Heart

Association class III-IV), chronic treatment for arterial hypertension, insulin-dependent diabetes mellitus, chronic renal failure, solid organ transplant, immunosuppression, cirrhosis

- SOFA scores at admission
- Physical exam (vital parameters, respiratory rate)
- Number of days under mechanical ventilation prior randomization if applicable
- Number of days under high flow nasal oxygen therapy prior randomization if applicable

#### For the ancillary study CACAO:

Environmental samples, including air and surfaces from the COVID-19 patients' room, will be collected at 6 occasions over the 24 first hours using a BioSampler or VIVAS device (for air) and Dacron swabs pre-moistened for surfaces.

The samples will be centralised to virology laboratory for Virological analyses to be performed in order to detect and quantify the presence of the SARS-CoV-2, and evaluate its infectivity by viral culture. Specific analytical methods will be developed.

The contamination of the patients' room will be studied using mixed effect statistical modeling of the data.

#### For the ancillary study of thrombo-inflammation parameters: blood specific samples

- 2 citrate tube blood 3.5ml
- 1 EDTA tube blood 7 mL +
- 1 dry tube blood 5 ml
- 1 heparinate tube blood 7 ml

## **5.2 Follow-up visits**

Patients will be evaluated daily while hospitalized in the ICU.

These daily evaluations will include assessment of adverse events (intubation requirement after inclusion, deaths, nosocomial infections).

Patients will receive the treatment according to the protocol presented in chapter 8.

In addition, the following visits will be performed during patient's follow up and the following data will be collected by the investigator in charge of the patient:

#### **Visit 2 on day 3 ± 1:**

- Vital status
- Physical exam (vital parameters, respiratory rate)
- Ventilation mode

- Data for SOFA scoring and type of organ or system failure
- Blood sampling
- Adverse events
- Concomitant treatments
- Hospitalization ward

**Visit 3 on day 7 ± 1:**

- Vital status
- Physical exam (vital parameters, respiratory rate)
- Ventilation mode
- Data for SOFA scoring and type of organ or system failure
- Blood sampling
- SARS-CoV-2 PCR (same sample type as day 1; preferably subglottic sample i.e. bronchoalveolar lavage or tracheal aspiration, otherwise nasopharyngeal swab)
- Adverse events
- Concomitant treatments
- Hospitalization ward

For the ancillary study of thrombo-inflammation parameters: blood specific samples

- 2 citrate tube blood 3.5ml
- 1 EDTA tube blood 7 mL +
- 1 dry tube blood 5 ml
- 1 heparinate tube blood 7 ml

**Visit 4 on day 10 ± 1:**

- Vital status
- Physical exam (vital parameters, respiratory rate)
- Ventilation mode
- Data for SOFA scoring and type of organ or system failure
- Blood sampling
- Adverse events
- Concomitant treatments
- Hospitalization ward

**Visit 5 on day 14 ± 1:**

- Vital status
- Physical exam (vital parameters, respiratory rate)
- Ventilation mode
- Data for SOFA scoring and type of organ or system failure



- Blood sampling
- Adverse events
- Concomitant treatments
- Hospitalization ward

**Visit 6 on day 21 ± 2:**

- Vital status
- Physical exam (vital parameters, respiratory rate)
- Ventilation mode
- Data for SOFA scoring and type of organ or system failure
- Blood sampling
- Adverse events
- Concomitant treatments
- Hospitalization ward

**Visit 7 on day 28 ± 2:**

- Vital status
- Physical exam (vital parameters, respiratory rate)
- Ventilation mode
- Data for SOFA scoring and type of organ or system failure
- Blood sampling
- Adverse events
- Concomitant treatments
- Hospitalization ward

**5.3 Last study visit**

The last follow up visit will be performed at month 60 days ± 2 weeks. This visit will include the evaluation of the vital status and the quality of life (EQ-5D-5L questionnaire). This follow-up visit can be done by telephone or during a consultation at the hospital if the patient is hospital discharge.

**5.4 Expected length of participation and description of the chronology and duration of the study.**

The maximal duration of participation of each patient will be 60 days.

|                                                        |           |
|--------------------------------------------------------|-----------|
| Duration of enrolment period                           | 12 months |
| The length of participation for participants, of which | 75 days   |

|                                                  |                     |
|--------------------------------------------------|---------------------|
| - Maximum period between selection and inclusion | NA                  |
| - Treatment period                               | 10 days             |
| - Follow up period                               | 60 days +/- 2 weeks |
| Total study duration                             | 14 ,5months         |

## 5.5 Table or diagram summarising the chronology of the study

| Actions                                                                                                                                                      | Baseline visit                                              | Visit 2      | Visit 3      | Visit 4       | Visit 5        | Visit 6        | Visit 7        | Visit at ICU discharge / hospital discharge | End of research |
|--------------------------------------------------------------------------------------------------------------------------------------------------------------|-------------------------------------------------------------|--------------|--------------|---------------|----------------|----------------|----------------|---------------------------------------------|-----------------|
|                                                                                                                                                              | D1 +/- 1 day                                                | D3 +/- 1 day | D7 +/- 1 day | D10 +/- 1 day | D14 +/- 1 days | D21 +/- 2 days | D28 +/- 2 days |                                             |                 |
| <b>Clinical Data</b>                                                                                                                                         |                                                             |              |              |               |                |                |                |                                             |                 |
| Inclusion and non-inclusion criteria                                                                                                                         | ▲                                                           |              |              |               |                |                |                |                                             |                 |
| Informed consent                                                                                                                                             | ▲                                                           |              |              |               |                |                |                |                                             |                 |
| Informed consent pursuit if necessary                                                                                                                        | ▲                                                           | ▲            | ▲            | ▲             | ▲              | ▲              | ▲              |                                             |                 |
| Demographics & Medical History                                                                                                                               | X                                                           |              |              |               |                |                |                |                                             |                 |
| Complete physical exam, including vital parameters, vital status                                                                                             | <b>Continuously</b>                                         |              |              |               |                |                |                |                                             |                 |
| SOFA Score                                                                                                                                                   | ▲                                                           | ▲            | ▲            | ▲             | ▲              | ▲              | ▲              | ▲                                           |                 |
| Consultation at hospital or Phone questionnaire (EQ-5D-5L questionnaire)                                                                                     |                                                             |              |              |               |                |                |                |                                             | ▲               |
| Adverse events                                                                                                                                               | <b>Continuously</b>                                         |              |              |               |                |                |                |                                             |                 |
| Randomisation : R1                                                                                                                                           | <b>Continuously</b>                                         |              |              |               |                |                |                |                                             |                 |
| <b>Treatment :</b><br>- Experimental group E1: Dexamethasone treatment –<br>- Control group C1: placebo of dexamethasone                                     | ▲                                                           | ▲            | ▲            | ▲             |                |                |                |                                             |                 |
| Randomisation : R2                                                                                                                                           | <b>Continuously</b>                                         |              |              |               |                |                |                |                                             |                 |
| <b>Treatment :</b><br>- Experimental group E2A: HFNO<br>- Experimental group E2B : CPAP<br>- Control group C2: standard oxygen therapy                       | ▲                                                           | ▲            | ▲            | ▲             | ▲              | ▲              | ▲              |                                             |                 |
| <b>Radiological Data</b>                                                                                                                                     |                                                             |              |              |               |                |                |                |                                             |                 |
| Chest X Ray                                                                                                                                                  | <b>At least every 48h during ICU stay, and for Hospital</b> |              |              |               |                |                |                |                                             |                 |
| <b>Biological Data</b>                                                                                                                                       |                                                             |              |              |               |                |                |                |                                             |                 |
| Blood β-HCG test for women of child-bearing age                                                                                                              | X                                                           |              |              |               |                |                |                |                                             |                 |
| Standard biology                                                                                                                                             | X                                                           | X            | X            | X             | X              | X              | X              | X                                           |                 |
| SARS-CoV-2 PCR (preferably subglottic sample i.e. bronchoalveolar lavage plugged telescopic catheter, or tracheal aspiration, otherwise nasopharyngeal swab) | X                                                           |              | X            |               |                |                |                |                                             |                 |
| Blood sampling for Bio collection                                                                                                                            | ▲                                                           | ▲            | ▲            |               | ▲              |                | ▲              | ▲                                           |                 |
| Environment air collection                                                                                                                                   | ▲                                                           |              |              |               |                |                |                |                                             |                 |

▲ : realized for the research

X: realized as part of the care

## 5.6 Distinction between standard care and study

TABLE: "Standard care" vs. "additional interventions" required specifically for the study

| Interventions, procedures and treatments carried out for research purposes | Interventions, procedures and treatments associated with <u>standard care</u>                                                                                                                                                                                       | Interventions, procedures and treatments added for <u>research purposes</u>     |
|----------------------------------------------------------------------------|---------------------------------------------------------------------------------------------------------------------------------------------------------------------------------------------------------------------------------------------------------------------|---------------------------------------------------------------------------------|
| <b>Procedures</b>                                                          | Standard Oxygen Therapy<br>Blood $\beta$ -HCG test for women of child-bearing age                                                                                                                                                                                   | HFNO<br>CPAP                                                                    |
| <b>Treatments</b>                                                          | Dexamethasone, 6 mg, according to the French <i>Haut Conseil de Santé Publique</i> (July, 23, 2020)<br>Drug with an antiviral activity (i.e lopinavir/ritonavir, remdesivir, hydroxychloroquine, Favipiravir or any new drug approved during the time of the study) | Dexamethasone, 14 mg<br>Placebo (Nacl)                                          |
| <b>Blood samples</b>                                                       |                                                                                                                                                                                                                                                                     | Blood sampling for biocollection at baseline, D3, D7, D14, D28 or ICU discharge |
| <b>Respiratory samples</b>                                                 | Respiratory samples as bronchoalveolar lavage, plugged telescopic catheter or tracheal aspiration, or nasopharyngeal swab if others are not feasible                                                                                                                |                                                                                 |
| <b>Environment air collection samples</b>                                  |                                                                                                                                                                                                                                                                     | Environment air samples at D1                                                   |
| <b>Imaging</b>                                                             | Chest X Ray, computed tomography                                                                                                                                                                                                                                    |                                                                                 |

## 5.7 Biological samples collection

Samples (serum and respiratory samples as bronchoalveolar lavage, plugged telescopic catheter, tracheal aspiration, or nasopharyngeal swab) taken as part of the study will be stored in a biological sample collection.

During the study the sample collection(s) will be stored at the Centre de Ressources Biologiques (CRB) de l'Hôpital Bichat-Claude Bernard under the supervision of Dr Sarah Tubiana for duration of 15 years.

SARS-CoV-2 is a new virus responsible of covid-19 disease, and development of a biobank from patients with this condition may be very useful for further research.

The samples may be used with the explicit agreement of the subject on the consent form for further analyses not included in the protocol and which could be beneficial for the pathology based on evolution in scientific knowledge.

The collection will be declared to the ANSM in the context of biomedical research.  
 At the end of the research, the samples will be preserved and will be declared to the minister responsible for research [and to the director of the regional health authority with local jurisdiction] (Article L. 1243-3 of the CSP (French Public Health Code)).

| Type of sample                                   | Quantity | Storage location      | Collection Supervisor | Purpose of the collection                          | Storage duration         |
|--------------------------------------------------|----------|-----------------------|-----------------------|----------------------------------------------------|--------------------------|
| BAL (bronchoalveolar lavage)                     | 2 vials  | CRB Bichat            | Dr Sarah TUBIANA      | To characterize biological endotypes of COVID-19   | Until Exhaustion samples |
| EDTA tube blood                                  | 2 vials  | CRB Bichat            | Dr Sarah TUBIANA      | To characterize biomarkers                         | Until Exhaustion samples |
| Serum Bank                                       | 30 ml    | CRB Bichat            | Dr Sarah TUBIANA      | To characterize biomarkers                         | Until Exhaustion samples |
| Serum Bank For Bichat and Strasbourg patients    | 12 ml    | CRB Bichat            | Dr Sarah TUBIANA      | To characterize biomarkers                         | Until Exhaustion samples |
| Blood samples For Bichat and Strasbourg patients | 78 ml    | Hematology Laboratory | Pr Nadine Ajzenberg   | Ancillary study of thrombo-inflammation parameters | Analysis during study    |

## 6 ELIGIBILITY CRITERIA

### 6.1 Inclusion criteria

Patients fulfilling all the following criteria will be eligible:

1. Age  $\geq$  18 years
2. Admitted to ICU within 48 hours
3. Confirmed or highly suspected COVID-19 infection
4. Acute hypoxemic respiratory failure (PaO<sub>2</sub> <70 mmHg or SpO<sub>2</sub><90% on room air or tachypnea>30/min or labored breathing or respiratory distress; need for oxygen flow  $\geq$ 6L/min)
5. Any treatment intended to treat the SARS-CoV-2 infection if accessible, in the absence of contraindications (either as a compassionate use or in the context of a clinical trial, i.e remdesivir, lopinavir/ritonavir, favipiravir, oseltamivir, hydroxychloroquine and any other new drug with potential activity).

### 6.2 Non-inclusion criteria

Will not be eligible patients meeting one of the following criteria:

1. Moribund status
2. Pregnancy or breastfeeding

3. Long term corticotherapy at a dose of 0.5mg/kg/j or higher
4. Active and untreated bacterial, fungal or parasitic infection
5. Not written informed consent from the patient or a legal representative if appropriate. If absence a legal representative the patient may be included in emergency procedure
6. Hypersensitivity to dexamethasone or to any of the excipients
7. Not Affiliation to the French social security

### 6.3 Recruitment procedure

The current epidemics of SARS-CoV-2 is currently growing. A very high number of COVID-19 cases are currently hospitalized in the intensive care, and keeps increasing. In all centers, over the first week end of March 2020, 20 patients were admitted to the intensive care.

|                                             | Number of participants |
|---------------------------------------------|------------------------|
| Total number of participants to be included | 550                    |
| Number of centres                           | 19                     |
| Enrolment period (months)                   | 12                     |
| Number of participants/centre               | 28,9                   |
| Number of participants/centre/month         | 2,4                    |

### 6.4 Termination rules

#### 6.4.1 Criteria and procedures for prematurely terminating the study treatment

Several situations are possible

- Temporary suspension of treatment: the investigator must document the reason for suspending and resuming the treatment in the participant's source file and the case report form (CRF)
- Premature discontinuation of treatment, but the participant remains enrolled in the study until the end of their participation
- Premature discontinuation of treatment and withdrawal from the study

The investigator must:

- o Document the reason(s)

- Collect the assessment criteria at the time of ending participation in the study, if the participant agrees
- Schedule a follow-up for the participant, particularly in case of a serious adverse event.

In the case of severe adverse events, the investigator must notify the sponsor and follow up the participant for 2 months following the premature discontinuation of treatment. Notification of a serious adverse event must be sent by email (eig-vigilance.drc@aphp.fr) to the sponsor. The serious adverse event will be monitored until it is resolved. If a Data Safety Monitoring Board has been created, the committee can specify and/or validate the follow-up methods.

#### **6.4.2 Criteria and procedure for premature withdrawal of a participant from the study**

- Participants may exit the study at any time and for any reason.
- The investigator can temporarily or permanently withdraw a participant from the study for any safety reason or if it is in the participant's best interests.
- Participant lost to follow-up: the participant cannot be located. The investigator must make every effort to reconnect with the participant (and document his attempts in the source file), at least to determine whether the participant is alive or dead
- If a participant exits the study prematurely or withdraws consent, any data collected prior to the date of premature exit may still be used.
- If a participant exits the study prematurely, and if the participant agrees, state the procedure and schedule for collecting the data required by the protocol (primary endpoint, secondary endpoints, safety assessment) (NB: this must be stated in the information and consent form)
- State how premature exit from the study will affect the participant's ongoing care (state exactly what the participant will be offered).
- In case of serious adverse events, see the corresponding section on vigilance

The case report form must list the various reasons why the participant has discontinued the study:

- Lack of efficacy
- Adverse reaction
- Another medical issue
- Personal reasons of the participant
- Explicit withdrawal of consent
- Lost to follow-up

### **6.4.3 Follow-up of participants following premature withdrawal from the study**

If a participant discontinues the study, this will in no way affect their usual care for their condition.

In the event of serious adverse events following premature discontinuation of treatment and participation of the patient in the study; see section 11.3

### **6.4.4 Full or partial discontinuation of the study**

AP-HP as sponsor or the Competent Authority (ANSM) can prematurely discontinue all or part of the study, temporarily or permanently, further to the recommendations of the Data Safety Monitoring Board in the following situations:

- first of all, if suspected unexpected serious adverse reactions (SUSARs) are observed in one of the treatment arms or if there is a discrepancy in the serious adverse reactions between the treatment arms, requiring a reassessment of the benefit-risk ratio for the study
- if an interim analysis confirms the efficacy of one of the treatment arms or, alternatively, the lack of efficacy

Similarly, AP-HP, as the sponsor, or the Competent Authority (ANSM) may decide to prematurely discontinue the study due to unforeseen issues or new information about the product, in light of which the objectives of the study or clinical programme are unlikely to be achieved.

AP-HP as sponsor reserves the right to permanently suspend enrolment at any time if it appears that the inclusion objectives are not met.

In all cases in which a study is discontinued, the care options must be specified for participants currently enrolled in the study. Notably, it must be specified if the participants included in the study must be monitored until the end of their participation, as set forth in the protocol.

If the study is prematurely discontinued for safety reasons (considered as urgent safety measure (USM)), the decision, justification and taken measures (with recommendations from the Data Safety Monitoring Board if applicable) will be provided without delay by the sponsor (AP-HP) to the Competent Authority (ANSM) and to the CPP (Research Ethics Committee).

The sponsor submits within a period of 15 days a request for substantial modification notifying these USM (for authorization by ANSM and for opinion by the CPP).



## **7 TREATMENT ADMINISTERED TO STUDY PARTICIPANTS**

### **7.1 Description of the investigational medicinal product(s)**

#### **7.1.1 Universal strategy of protection of healthcare workers for caring ICU patients confirmed with SARS-CoV-2 used in R-DXM and R-O2) (adapted from Bouadma L et al Intensive care med 2020)**

Dress precautions before entering the room where suspected or confirmed SARS-CoV-2 infected patients are admitted for oxygen therapy

Place an instruction sheet to staff on how to don and doff PPE without contamination on All staff must wear a designated scrub.

Airborne precautions using a FFP2 mask or equivalent; wear a mobcap to facilitate the removal of FFP2

Contact and droplet precautions in addition to using standard precautions: clean, non-sterile, gown with long –sleeved with fabric reinforcement (arms, front side) and gloves.

Eye protection with reusable goggles or facial protection (face shield) (soaked in bleach for 15 minutes).

Personal items are not allowed into the room.

In case of a sterile procedure the same precautions should be taken however using sterile gown and gloves.

#### **Environment/equipment (no equipment should be shared)**

If possible, patients are placed into negative pressure isolation rooms with anteroom and door closed at all time. Alarm supervision station and at best video camera equipment to monitor the patient

If negative pressure isolation rooms are not available, one may use mobile air decontamination units in the patient's room

Alcohol-based handrub and disinfectants, gloves, gowns, and masks should be readily available

Careful and frequent cleaning of surfaces with disposable clothes and bleach, or effective disinfectant

#### **7.1.2 Investigational medicinal product in study of the effect of corticoids**

*Presentation:*

Pre randomized, labelled, numbered according to the treatment list, Box of 10 DEXAMETHASONE 20 mg or NaCl 0,9%, solution for injection in ampoule of 5mL.

Each allocated box contains complete treatment from D1 to D10 for one patient.

*Storage:*

Treatments have to be stored below 25°C in a secured local.

Posology for clinical trial:

All patients from the experimental group will receive by IV route at the following dose: 14mg daily from day 1 to day 5 then 4mg daily from day 6 to day 10

### **7.1.3 Investigational medicinal product: study of the effect of oxygen support modality**

#### **7.1.3.1 In all groups**

Within the hour after the validation of selection criteria, patients will be assigned to the allocated strategy (conventional oxygen or CPAP or HFNO) after having signed informed consent. In all groups, the oxygen flow will be adjusted to maintain an oxygen saturation level of 92% or more, as measured by means of pulse oximetry (SpO<sub>2</sub>). Nursing staff at the site will administer the respiratory support under the responsibility of the investigator. Any omission of study treatment will be recorded in the Case Report Form (CRF) to monitor treatment compliance.

#### **7.1.3.2 Standard oxygen treatment**

Patients assigned to the standard treatment group will receive oxygen delivered through a nonrebreather face mask until endotracheal intubation, death, or fulfillment of oxygen delivery cessation criteria (an SpO<sub>2</sub> above 92% without oxygen and a respiratory rate below 25 cycles/min).

#### **7.1.3.3 CPAP treatment**

Patients assigned to the CPAP plus oxygen group will receive periods of CPAP in addition to the standard treatment. All study centers will use a Boussignac device (Vygon) connected to an oro-nasal mask composed of a transparent mask and a soft inflatable cushion, with a heat and moisture exchanger exchanger ("Filter Boussignac CPAP"). In order to protect the environment and the medical staff from any contamination from the patient's airway, the principle of the "Filter Boussignac CPAP" is to add a heat and moisture exchanger, which acts as a "microbiological barrier" between the oro-nasal mask and the Boussignac valve. The connection requires a 22M-22F connector (Figure).

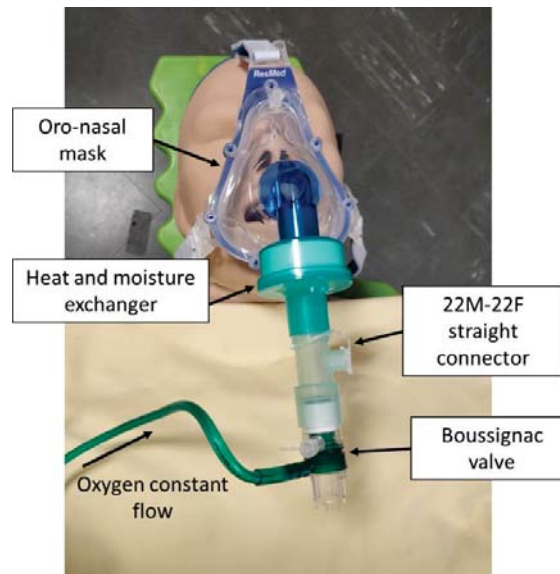

Any NIV mask can be used except for masks equipped with an intentional leak system, which must be proscribed in this situation to avoid contamination of healthcare workers.

The detailed procedure for the use of the Filter Boussignac CPAP is available at: <http://www.reamondor.aphp.fr/covid19>

CPAP will be started at 15L/min oxygen (which correspond to an average pressure of 8 cmH<sub>2</sub>O). The level will be decreased to 10L/min or increased to 20L/min as needed based on the clinical response and tolerance. For at least the first 6 to 12 hours, CPAP will be given continuously and then discontinuously (for at least 6 hours/day) based on patient tolerance (5). CPAP will be continued until endotracheal intubation, death, or fulfillment of the following cessation criteria: SpO<sub>2</sub> above 92% and respiratory rate below 25 cycles/min with FiO<sub>2</sub> of 30% or less and a CPAP level of 5 cmH<sub>2</sub>O. The criteria for oxygen delivery cessation will be the same as in the standard therapy group.

#### 7.1.3.4 HFNO treatment

In the high-flow–nasal cannula group, oxygen will be delivered through a heated humidifier (Airvo-2, Fisher and Paykel Healthcare) and applied continuously through large-bore binasal prongs, with a gas flow rate of 30 liters per minute and adjusted based on the clinical response. FiO<sub>2</sub> will be adjusted for the target SpO<sub>2</sub>. HFNO will be continued until endotracheal intubation, death, or fulfillment of the following cessation criteria: SpO<sub>2</sub> above 92% and respiratory rate below 25 cycles/min with a FiO<sub>2</sub> of 30% or less and a gas flow of 30 liters per minute. The criteria for oxygen delivery cessation will be the same as in the standard therapy group.

## **7.2 Description of Additional medicinal product(s) (treatments required to conduct the study)**

Patients will be allowed to receive non experimental medication required by their medical condition, particularly antiviral therapy.

## **7.3 Description of traceability elements accompanying the investigational medicinal product(s)**

Sponsor will provide local pharmacies with experimental treatments.

Automatic allocation system obligates to store all boxes in a single place. According to local organization, it will be in local pharmacy or in ICU.

## **7.4 Authorised and prohibited treatments (medicinal, additional medicinal, surgical), including rescue medications**

Open label steroids (hydrocortisone as a 50-mg intravenous bolus every 6 hours, and fludrocortisone given as a 50- $\mu$ g tablet through a nasogastric tube once daily, for 7 days, without tapering) will be authorized in case of septic shock defined as follows:

- the presence of a clinically or microbiologically documented infection,
- a Sequential Organ Failure Assessment (SOFA) score of 3 or 4 for at least two organs for at least 6 hours,
- and receipt of vasopressor therapy (norepinephrine, epinephrine, or any other vasopressor at a dose of  $\geq 0.25$   $\mu$ g per kilogram of body weight per minute or  $\geq 1$  mg per hour), increasing for at least 6 hours to maintain a systolic blood pressure of at least 90 mm Hg or a mean blood pressure of at least 65 mm Hg (18).

In both groups, the administration of low-dose dexamethasone (at 6 mg/day) will be part of the standard of care, including the continuation of any administration of dexamethasone to patients who have already been administrated dexamethasone before arriving in ICU.

Such an administration is indeed that recommended by the French *Haut Conseil de Santé Publique* in patients aged less than 70 years.

## **7.5 Methods for monitoring compliance with the treatment**

The compliance to allocated treatment will be evaluated daily in a specific CRF by the investigator in charge of the patient.

Ten removable labels are present on each box to permit traceability of each administration on “administration monitoring form for nurse”.

## **8 EFFICACY ASSESSMENT**

### **8.1 Description of efficacy endpoints assessment parameters**

#### **For the study of the effect of high-dose corticosteroids**

The primary efficacy outcome variable is the time-to-death from all causes at Day 60 after randomization.

Secondary efficacy endpoints include:

1. The cycle threshold for SARS-CoV-2 PCR at baseline, day 7 and end-of therapy in samples of the same origin (preferably subglottic i.e. bronchoalveolar lavage protected telescopic catheter or tracheal aspiration, otherwise nasopharyngeal swab)
2. Proportion of patients with at least one episode of any healthcare-associated infection between randomization and D28
3. Number of days alive without mechanical ventilation between randomization and day 28
4. Changes in SOFA score from day 1 to day 3, day 7, day 10, day 14, day 21, day 28 or discharge-day from ICU as appropriate
5. Number of days alive without renal replacement therapy between randomization and day 28
6. Length of ICU-stay and hospital-stay

#### **For the study of the effect of oxygen support modality**

The primary efficacy outcome variable is the cumulative incidence of mechanical ventilation within 28 days after randomization. We will take into account death as a potential competing risk to mechanical ventilation.

Secondary efficacy endpoints are:

1. Overall mortality at day 28 and day 60
2. Number of days alive without invasive mechanical ventilation between randomization and day 28
3. Proportion of patients with severe hypoxemia, which is defined as an oxygen saturation of less than 80% during the same interval during the interval between induction and 2 minutes after tracheal intubation
4. Proportion of patients with cardiac arrest within 1 hour after intubation

5. Proportion of patients with at least one episode of any healthcare-associated infection between randomization and day 28
6. Lengths of ICU-stay and hospital-stay

## **8.2 Anticipated methods and timetable for measuring, collecting and analysing the efficacy data**

### **For the study of the effect of corticosteroids**

#### **Primary Efficacy Outcome Variable**

Parameter: overall mortality

Method: vital status assessment

Timetable: day 60

#### **Secondary Efficacy Outcome Variables**

1. Parameter: The cycle threshold for SARS-CoV-2 PCR  
Method: SARS-CoV-2 PCR on samples of the same origin (preferably subglottic i.e. bronchoalveolar lavage, plugged telescopic catheter or tracheal aspiration, otherwise nasopharyngeal swab)  
Timetable: at baseline, day 7 and end-of therapy
2. Parameter: Proportion of patients with at least one episode of any healthcare associated infection between randomization and D28  
Method: medical history  
Timetable: registration of the number of patients with at least one episode of any healthcare associated infection between randomization and D28
3. Parameter: Number of days alive without mechanical ventilation between randomization and day 28  
Method: medical history  
Timetable: registration of the number of days on which the patient received invasive or noninvasive mechanical ventilation between randomization and day 28
4. Parameter: Changes in SOFA score  
Method: The SOFA score, a scoring system to determine the extent of 6 organ systems dysfunctions has the advantage to be very sensitive. The scale of the SOFA score ranges from 0 to 24, with higher scores indicating a greater severity of organ failure. Sub-scores of SOFA range from 0 to 4 for each of the 6 organ systems (respiratory, cardiovascular, hepatic, coagulation, renal and neurological), with an aggregate sum score of 0 to 24.  
Timetable: D1, D3, D7, D10, D14, D21, D28 or ICU-discharge day

5. Parameter: Number of days alive without renal replacement therapy between randomization and day 28  
Method: medical history  
Timetable: registration of the number of days on which the patient received renal replacement therapy between randomization and day 28
6. Parameter: Length of ICU-stay and hospital-stay  
Method: medical history  
Timetable: date of ICU and hospital discharge

### **For the study of the effect of oxygen support modality**

#### **Primary Efficacy Outcome Variable**

Parameter: mechanical ventilation  
Method: ventilation mode assessment  
Timetable: daily until day-28 or ICU discharge

#### **Secondary Efficacy Outcome Variables**

1. Parameter: Overall mortality at day 28 and day 60  
Method: vital status (obtained by telephone if the patient is discharged from hospital or lost to follow-up)  
Timetable: day 28, day 60
2. Parameter: Number of days alive without invasive mechanical ventilation between randomization and day 28  
Method: medical history  
Timetable: registration of the number of days on which the patient received invasive or non-invasive mechanical ventilation between randomization and day 28
3. Parameter: Proportion of patients with severe hypoxemia  
Method: medical history  
Timetable: registration of the number of patients with severe hypoxemia, defined as an oxygen saturation of less than 80% during the same interval during the interval between induction and 2 minutes after tracheal intubation
4. Parameter: Proportion of patients with cardiac arrest within 1 hour after intubation  
Method: medical history  
Timetable: registration of the number of patients with cardiac arrest within 1 hour after intubation
5. Parameter: Proportion of patients with at least one episode of any healthcare-associated infection between randomization and day 28  
Method: medical history

Timetable: registration of the number of patients with at least one episode of any healthcare-associated infection between randomization and day 28

6. Parameter: Length of ICU-stay and hospital-stay

Method: medical history

Timetable: date of ICU and hospital discharge

## **9 SPECIFIC STUDY COMMITTEES**

### **9.1 Steering Committee**

The steering committee includes:

The coordinating investigator: Pr Jean-François Timsit

The scientific director: Pr Lila Bouadma

The methodologists: Pr Sylvie Chevret, Dr Charles Burdet,

The representative of the sponsor: Naima Beldjoudi (URC Paris Nord) and Fadila Amerali (DRCI)

The missions of the steering committee are to organize the research, to coordinate the information and to monitor the conduct of research.

The steering committee meets every 6 months.

### **9.2 Scientific Committee**

List the members of scientific committee:

- Pr Jean-François Timsit, Medical Reanimation, AP-HP BICHAT

- Pr Lila Bouadma (ICU, Bichat), Pr Julien Poissy (ICU, CHU Lille), Pr Armand Mekontso Dessap (ICU, Henri Mondor), Pr Ferhat Mezziani (ICU, CHU Strasbourg), Pr Yves Cohen (ICU, Avicenne), Pr Sylvie Chevret (URC Saint-Louis), Dr Benoît Visseaux (Virology Lab, Bichat), Dr Charles Burdet (DEBRC, Bichat).

The missions of the scientific committee are to define the objectives of the research, to propose changes of the protocol during research, to determine the methodology.

The scientific committee decides during the research what to do in unexpected situations.

The scientific committee will meet before first inclusion, at each interim analysis in same time DSMB committee.



## **10 SAFETY ASSESSMENT - RISKS AND BURDEN ADDED BY THE STUDY**

### **10.1 Description of Safety endpoints assessment parameters**

**For both studies (effect of high-dose corticosteroids and effect of oxygen support modality)** the secondary safety outcome variables are:

- Proportion of patients with at least one episode of any healthcare-associated infection between randomization and day 28
- Changes in SOFA score from day 1 to day 3, day 7, day 10, day 14, day 21, day 28 or discharge-day from ICU as appropriate.

The evaluation of tolerance to treatments used in this study is not the main goal of this research project. However, adverse events will be collected in the CRF and the SAE will be reported to the sponsor.

### **10.2 Anticipated methods and timetable for measuring, collecting and analysing the safety endpoints**

**For both studies (effect of high-dose corticosteroids and effect of oxygen support modality)**

1. Parameter: Healthcare associated infection  
Method: clinical history, temperature, chest X-ray, bronchoalveolar lavage, tracheal aspiration, or nasopharyngeal samples  
Timetable: every day in the ICU
2. Parameter: overall mortality  
Method: vital status assessment  
Timetable: day28

In addition to these safety assessments, a data safety monitoring board will be constituted for this research.

3. Parameter: Changes in SOFA score  
Method: The SOFA score, a scoring system to determine the extent of 6 organ systems dysfunctions has the advantage to be very sensitive. The scale of the SOFA score ranges from 0 to 24, with higher scores indicating a greater severity of organ failure. Sub scores of SOFA range from 0 to 4 for each of the 6 organ systems (respiratory, cardiovascular, hepatic, coagulation, renal and neurological), with an aggregate score of 0 to 24.  
Timetable: day 1 to day 3, day 7, day 10, day 14, day 21, day 28 or ICU-discharge day

## 10.3 Recording and reporting adverse events

### 10.3.1 Definitions

According to Article R.1123-46 of the Code de la Santé Publique (French Public Health Code):

- **Adverse event**

Any untoward medical occurrence in a study participant, which does not necessarily have a causal relationship with the study or with the product subject to the study.

- **Adverse reaction**

An adverse event occurring in a study involving human participants when this event is related to the study or to the product being studied.

- **Adverse reaction to an investigational medicinal product**

Any untoward and unwanted reaction to an investigational medication regardless of the dose administered.

- **Serious adverse event or reaction**

Any adverse event or reaction that results in death, threatens the life of the participant enrolled in the study, requires hospitalisation or prolongs existing hospitalisation, causes a severe or long-term disability or handicap, or results in a congenital abnormality or deformity, and in the case of a medication, regardless of the dose administered.

- **Unexpected adverse reaction to an investigational medicinal product**

Any adverse reaction to the product whose nature, severity, frequency or outcome is inconsistent with the standard safety information described in the summary of the product characteristics, or in the investigator's brochure if the product is not authorised.

According to Article R.1123-46 of the Code de la Santé Publique and the guidelines for sponsors of clinical trials (ANSM):

- **Emerging safety issue**

Any new information that may lead to a reassessment of the risk/benefit ratio of the trial or of the product under investigation, modifications in the investigational medicinal product use, the conduct of the clinical trial or the clinical trial documents, or a suspension, interruption or modification of the clinical trial or of similar trials.

For studies involving the first administration of a health product in healthy volunteers: any serious adverse reaction.

Examples:

a) any clinically significant increase in the frequency of an expected serious adverse reaction;

b) suspected unexpected serious adverse reactions in patients who have terminated their participation in the clinical trial which have been notified to by the investigator to the sponsor, as well as potential follow-up reports;

c) any new fact relating to the conduct of the clinical trial or the development of the investigational medicinal product, if the new fact is likely to affect participant safety

Examples:

- a serious adverse event likely to be related to the trial's interventions and diagnostic procedures and which may impact the conduct of the clinical trial,
- a significant risk for the trial participants such as a lack of efficacy of the investigational medicinal product used in the treatment of a life-threatening disease,
- significant safety results from a recently completed study on animal subjects (such as a carcinogenicity study),
- the premature termination, or temporary suspension, of a trial conducted with the same investigational medicinal product in another country, for safety reasons
- an unexpected serious adverse reaction related to a non-investigational medicinal product required to conduct the trial, (e.g.: "challenge agents", rescue treatment)

d) recommendations from the Data Safety Monitoring Board (DSMB), if applicable, if they are relevant to the safety of the participants

e) any unexpected serious adverse reaction reported to the sponsor by another sponsor of a clinical trial carried out in a different country but relating to the same medication

### 10.3.2 The role of the investigator

The investigator must **assess the seriousness of each adverse event** and record all serious and non-serious adverse events in the case report form (eCRF)

The investigator must **document** serious adverse events **as thoroughly as possible** and provide a definitive medical diagnosis, if possible.

The investigator must **assess the intensity** of the adverse events:

- either by using general terms:

- o *Mild: tolerated by the patient, does not interfere with daily activities*
- o *Moderate: sufficiently uncomfortable to affect daily activities*
- o *Severe: prevents daily activities*

- or by using a rating scale for adverse events appended to the protocol : Common Terminology Criteria for Adverse Events(CTCAE) (V5.0 : November 27, 2017) [National Cancer Institute]

The investigator must **assess the causal relationship** between serious adverse events and the investigational medicinal product(s), or interventions/procedures added by the study.

The method used by the investigator is based on the WHO Uppsala Monitoring Centre method and uses the following 4 causality terms:

- Certain
- Probable/likely
- Possible
- Unlikely (not excluded)

Their definition is presented in the following table (excerpt from WHO-UMC causality categories, version dated 17/04/2012).

Table: WHO-UMC causality categories (excerpt)

| Causality term          | Assessment criteria*                                                                                                                                                                                                                                                                                                                                                                                                                                                                                    |
|-------------------------|---------------------------------------------------------------------------------------------------------------------------------------------------------------------------------------------------------------------------------------------------------------------------------------------------------------------------------------------------------------------------------------------------------------------------------------------------------------------------------------------------------|
| <b>Certain to occur</b> | <ul style="list-style-type: none"> <li>· Event or laboratory test abnormality, with plausible time relationship to drug intake**</li> <li>· Cannot be explained by disease or other drugs</li> <li>· Response to withdrawal plausible (pharmacologically, pathologically)</li> <li>· Event definitive pharmacologically or phenomenologically (i.e. an objective and specific medical disorder or a recognised pharmacological phenomenon)</li> <li>· Rechallenge satisfactory, if necessary</li> </ul> |
| <b>Probable/Likely</b>  | <ul style="list-style-type: none"> <li>· Event or laboratory test abnormality, with reasonable time relationship to drug intake**</li> <li>· Unlikely to be attributed to disease or other drugs</li> <li>· Response to withdrawal clinically reasonable</li> <li>· Rechallenge not required</li> </ul>                                                                                                                                                                                                 |
| <b>Possible</b>         | <ul style="list-style-type: none"> <li>· Event or laboratory test abnormality, with reasonable time relationship to drug intake**</li> <li>· Could also be explained by disease or other drugs</li> <li>· Information on drug withdrawal may be lacking or unclear</li> </ul>                                                                                                                                                                                                                           |
| <b>Unlikely</b>         | <ul style="list-style-type: none"> <li>· Event or laboratory test abnormality, with a time to drug intake**</li> <li>· that makes a relationship improbable (but not impossible)</li> <li>· Disease or other drugs provide plausible explanations</li> </ul>                                                                                                                                                                                                                                            |

\*All points should be reasonably complied with

\*\*Or study procedures

### 10.3.2.1 Serious adverse events that require the investigator to notify the sponsor without delay

As per article R.1123-49 of the *Code de la Santé Publique* (French Public Health Code), the investigator notifies the sponsor without delay (and at the latest within 24 hours) on the day the investigator becomes aware of any serious adverse event which occurs during a study that meets the description in line 1° of Article L.1121-1 of the Code de la Santé Publique, with the exception of any event which is listed in the protocol and, if applicable, in the investigator's brochure as not requiring notification.

A serious adverse event is any untoward medical occurrence that:

- 1- results in death
- 2- is life-threatening to the participant enrolled in the study

- 3- requires hospitalisation or prolongation of existing hospitalisation
- 4- results in persistent or significant disability/incapacity
- 5- is a congenital anomaly/birth defect

### **10.3.2.2 Specific features of the protocol**

#### **10.3.2.2.1 Other events that require the investigator to notify without delay the sponsor**

- ***In utero exposure***

The investigator must notify the sponsor without delay (and at the latest within 24 hours) on the day the investigator becomes aware of any pregnancy that occurs during the study, even if it is not associated with an adverse event.

If the investigational medicinal product is genotoxic, every case of maternal or paternal exposure must be notified.

#### **10.3.2.2.2 Serious adverse events that do not require the investigator to notify the sponsor without delay**

These serious adverse events are only recorded in the case report forms.

- *Normal and natural course of the condition:*
  - *Worsening of the respiratory condition under investigation*
  - *Ventilator-acquired bacterial pneumonia*
  - *Documented fungal infections*
  - *HSV/CMV PCR positivity after inclusion*
  - *Bloodstream infections*
  - *Hyperglycemia > 13 mM/ ml not resolving with insulin therapy*
  - *ICU acquired neuropathy*

The severe COVID-19 pneumonia admitted in ICU resulted in mechanical ventilation in 60-80% of the cases. ARDS occurred in more than ¾ of the intubated patients. Acute renal failure occurred in ARDS patients usually 3-5 days after ARDS onset. Hyperbilirubinemia (> 10 N) is common in the severe forms of ARDS with acute renal failure.

Ventilator associated pneumonia occurred in 20-30% of ARDS patients. Data on first patients with ARDS due to COVID-19 found nosocomial infections most of time occurring during the third and fourth week of evolution.

The primary objective of the study is to assess the impact of Dexamethasone on overall mortality at day-60 after randomization in patients admitted in ICU for severe COVID-19 infection.

The interventions added by the study being: injection of Dexamethasone IV, **deaths (only related to disease progression and not to the investigational medicinal product and/or procedures specific to the study) do not need to be notified to the sponsor without delay but will be recorded in the case report forms.**

The retrieval of deaths data will be sent by email to the members of the Data Safety Monitoring Board and to the safety Department (DRCI) at the address [expertisecsi.drc@aphp.fr](mailto:expertisecsi.drc@aphp.fr) by the Clinical Research Unit before any meeting of DSMB and at least every 50 patients included.

It will be the same for nosocomial infections and the need for intubations (with delay between inclusion and intubation).

If there is any discrepancy between the groups or the mortality rate is higher than expected affecting participant safety and which requires the sponsor to take urgent safety measures, the ANSM (French Health Products Safety Agency) will be informed about the emerging safety issue without delay.

- Adverse events potentially related to treatments prescribed as part of the care provided during the study follow-up

The investigator must report these adverse events to the relevant regional pharmacovigilance centre, Centre Régional de Pharmacovigilance (CRPV). This frequently events are:

- *Documented fungal infections*
- *HSV/CMV PCR positivity after inclusion*
- *Bloodstream infections*
- *Hyperglycemia > 13 mM/ ml not resolving with insulin therapy*
- *ICU acquired neuropathy*

### **10.3.2.3 Period during which SAEs must be notified without delay by the investigator to the sponsor**

The investigator must notify the sponsor without delay of any serious adverse events as defined in the corresponding section:

- from the date on which the participant signs the consent form
- throughout the whole follow-up period required for the trial (until D60 ± 2 weeks)
- after the end of the clinical trial if the SAE is likely to be due to the investigational medicinal product (IMP) or to the study interventions (e.g. serious reactions that could appear long after exposure to the medication, such as cancers or congenital

abnormalities). In that case, the investigator does not have to systematically and indefinitely collect all SAEs possibly related to the IMP, but must notify all possible SAEs related to the IMP of which he has knowledge.

#### **10.3.2.4 Procedures and deadlines for notifying the sponsor**

The initial notification of an SAE must be provided in a written report signed by the investigator using a SAE notification form specific to the study and intended for this purpose (in the case report form).

Each item in this form must be completed by the investigator so that the sponsor can carry out the appropriate analysis.

The initial notification to the sponsor of a serious adverse event must be quickly followed by an additional detailed written report (or reports) so that the case outcome may be monitored by the Safety Department or to provide further information.

Whenever possible, the investigator will provide the sponsor with any documents that may be useful (medical reports, laboratory test results, results from additional examinations, etc.). These documents must be non-identifying. In addition, the documents must include the following: study acronym, number and participant's initials.

Any adverse event will be monitored until fully resolved (stabilisation at a level considered acceptable by the investigator, or return to the previous state) even if the participant has left the study.

The initial notification, the SAE follow-up reports and all other documents must be sent to the sponsor's Safety Department **by email ([eig-vigilance.drc@aphp.fr](mailto:eig-vigilance.drc@aphp.fr))**. It should be noted that it is possible to send SAE reports to the Safety Department **by fax to +33 (0)1 44 84 17 99** only in the event of a failed attempt to send the SAE report by email (in order to avoid duplication).

For studies which use e-CRFs

- the investigator completes the SAE notification form in the e-CRF, then validates, prints, and signs the form before sending it by email;
- if it is not possible to connect to the e-CRF, the investigator should complete, sign, and send the SAE notification form to the Safety Department. As soon as the connection is restored, the SAE notification form in the e-CRF must be duly completed.

The investigator must respond to all requests from the sponsor for additional information. For all questions relating to the notification of an adverse event, the Safety Department can be contacted via email: [vigilance.drc@aphp.fr](mailto:vigilance.drc@aphp.fr).

For cases of *in utero* exposure, the investigator will complete the Notification and Follow-up form for a pregnancy occurring during participation in a study".

The investigator must monitor the pregnant woman throughout her pregnancy or until the pregnancy is terminated, and must notify the sponsor of the outcome of the pregnancy using this form.

If the outcome of the pregnancy falls within the definition of a serious adverse event (miscarriage, pregnancy termination, foetal death, congenital abnormality, etc.), the investigator must follow the procedure for reporting SAEs.

The initial pregnancy notification, the SAE follow-up reports, and any other documents will be sent to the sponsor according to the same procedures specified herein.

If it was the father who was exposed, the investigator must obtain the pregnant woman's permission before collecting information about the pregnancy.

### 10.3.3 Role of the sponsor

The sponsor, represented by its Safety Department, shall continuously, throughout the trial, assess the safety of each investigational medicinal product throughout the study.

#### 10.3.3.1 Analysis and declaration of serious adverse events

The sponsor assesses:

- the **seriousness** of all the adverse events reported
- the **causal relationship** between these events and each investigational medicinal product and procedures and any other treatments,

All serious adverse events which the investigator and/or the sponsor reasonably believe may have a causal relationship with the investigational medicinal product are classed as suspected serious adverse reactions.

- the **expected or unexpected nature** of the serious adverse reactions

Any serious adverse reaction whose nature, severity, frequency or outcome is inconsistent with the safety information described in the summary of product characteristics, or in the investigator's brochure if the product is not authorised, is considered unexpected.

The sponsor, represented by its Safety Department, assesses the expected/unexpected nature of a serious adverse reaction based on the information described below.



- ❖ For serious adverse events likely to be related to the investigational medicinal product(s):
  - refer to the SmPC for DEXAMETHASONE specialty enclosed in appendix 19.3 to this protocol
  
- ❖ The serious adverse events potentially related to the procedures or examinations specific to the study are:
  - High-Flow Nasal Oxygen (HFNO) : ulceration of the nostril, nosebleeds and a theoretical risk of gastric distension
  - Continuous Positive Airway Pressure (CPAP) : intolerance to the nasal mask, dry nose and mouth and / or rhinitis and rhinorrhoea
  - Standard oxygen: ulceration of the nostril, nose bleeds, nasal / oral dryness.

The sponsor will report all suspected unexpected serious adverse reactions (SUSARs), within the regulatory time frame, to the ANSM:

- The sponsor must send the initial report without delay upon learning of the unexpected serious adverse reaction if is fatal or life-threatening, or otherwise within 15 days from learning of any other type of unexpected serious adverse reaction;
- All additional, relevant information must be declared by the sponsor in the form of follow-up reports within a period of 8 calendar days starting from when the sponsor had this information.

**Furthermore, ANSM requests that all suspected expected serious adverse reactions if they are fatal or life-threatening will be sent by the sponsor to the ANSM as SUSAR.**

**However, it is expected that the volume of these SARs is high.**

**Then, the sponsor will send weekly to the ANSM a listing of all these SARs.**

Any suspected unexpected serious adverse reaction must also be declared electronically using the Eudravigilance European adverse drug reactions database managed by the European Medicines Agency (EMA).

The sponsor must notify all the investigators involved about any information that could adversely affect the safety of the research participants.

### **10.3.3.2 Analysis and declaration of other safety data**

This means any new information that prompts a reassessment of the risk/benefit ratio of the trial or of the product under investigation, or which could be sufficient to consider changes to the use of the product, the trial procedures or trial documentation, or the suspension, cancellation or amendment of the research trial or of other similar trials.

The sponsor will inform the competent authority and the Research Ethics Committee without delay upon knowledge of any emerging safety issue and, if applicable, describe what measures have been taken.

Following the initial declaration of any emerging safety issue, the sponsor will address to competent authorities any additional relevant information about the emerging safety issue in the form of a follow-up report, which must be sent no later than 8 days after learning of the information.

### **10.3.3.3 Annual safety report**

Not applicable as total research duration (6 months) less than 1 year.

### **10.3.4 Data Safety Monitoring Board (DSMB)**

A DSMB will be established for this trial. Safety oversight will be conducted by a DSMB that is an independent group of experts that monitors subject safety and sponsor. The DSMB members will be separate and independent of study personnel participating in this trial.

The DSMB will consist of independent members with appropriate expertise to contribute to the interpretation of the data from this trial. The DSMB will review SAEs on a regular basis and ad hoc during this trial. The interim trial results will be monitored by the DSMB, and if at any stage evidence emerges that any one treatment arm is definitely inferior then it will be centrally decided that that arm will be discontinued. The study will not stop enrolment awaiting these DSMB reviews, though the DSMB may recommend temporary or permanent cessation of enrolment based on their safety reviews. Additional data may be requested by the DSMB, and interim statistical reports may be generated as deemed necessary and appropriate. The DSMB may receive data in aggregate and presented by treatment arm. The DSMB will review grouped data in the closed session only. As an outcome of each review/meeting, the DSMB will make a recommendation as to the advisability to continue, modify, or terminate this trial.

The DSMB must hold its first meeting before the first participant is enrolled and ideally before the protocol is submitted to the competent authority and the CPP (Research Ethics Committee).

All missions as well as the specific operating procedures of the DSMB are described in the study's DSMB charter.

The DSMB members are:

- List the members of the DSMB:

- Pr CARIOU Alain, Medical Reanimation, AP-HP Cochin
- Pr BOYER Alexandre, Medical Reanimation, CHU Bordeaux
- Dr Patricia PAVESE, Infectiology, CHU Grenoble
- Pr Bruno GIRAUDEAU, Clinical Investigation Center, CHRU Tours

The DSMB will operate in accordance with the sponsor's procedures. The DSMB works in an advisory capacity only and the sponsor retains all decision-making authority.

## **11 DATA MANAGEMENT**

### **11.1 Data collection procedures**

### **11.2 Identification of data recorded directly in the CRFs which will be considered as source data**

For the data collection in electronic format, the statistical software CleanWeb for data entry will be used. The software will fulfil the regulatory requirements and security norms.

### **11.3 Right to access data and source documents**

#### **11.3.1 Data access**

In accordance with GCPs:

- the sponsor is responsible for ensuring all parties involved in the study agree to guarantee direct access to all locations where the study will be carried out, the source data, the source documents and the reports, for the purposes of the sponsor's quality control and audit procedures or inspections by the competent authority
- the investigators will ensure the persons in charge of monitoring, quality control and auditing or inspecting the interventional study involving human participants have access to the documents and personal data strictly necessary for these tasks, in accordance with the statutory and regulatory provisions in force (Articles L.1121-3 and R.5121-13 of the French Public Health Code)

### 11.3.2 Source documents

Source documents are defined as any original document or item that can prove the existence or accuracy of a data or a fact recorded during the study. These documents will be kept in accordance with the regulations in force by the investigator or by the hospital in the case of a hospital medical file.

During this research, the Social Security Number (NIR) is collected.

The social security number is collected in order to enable subsequent matching with health insurance data (via the DCIR, inter-regime consumption datamart), hospital data (via the PMSI) and causes of death (via the CEPIDC).

The DCIR database contains all the individualised health care claims reimbursed by the French health insurance. These claims data include, in particular, drugs dispensed coded according to the Anatomical Therapeutic Chemical (ATC) classification, ambulatory medical acts coded according to the French medical classification of clinical acts (CCAM) and biological acts coded according to the French classification of biological acts (NABM).

The PMSI database provides detailed medical information on all admissions to public and private hospitals in France, including ICD-10 codes for discharge diagnoses, medical acts coded according to the French medical classification for clinical acts.

### 11.3.3 Data confidentiality

The persons responsible for the quality control of clinical studies (Article L.1121-3 of the *Code de la Santé Publique* [French Public Health Code]) will take all necessary precautions to ensure the confidentiality of information relating to the investigational medicinal products, the study, the study participants and in particular their identity and the results obtained.

These persons, as well as the investigators themselves, are bound by professional secrecy (in accordance with the conditions set out in Articles 226-13 and 226-14 of the *Code Pénal* [French Criminal Code]).

During and after the research involving human participants, all data collected concerning the participants and sent to the sponsor by the investigators (or any other specialised collaborators) will be rendered non-identifying.

Under no circumstances shall the names and addresses of the participants involved be shown.

Only the participant's initials will be recorded, accompanied by an encoded number specific to the study indicating the order of enrolment.

The sponsor will ensure that each participant has given written permission for any personal information about him or her which is strictly necessary for the quality control of the study to be accessed.

#### **11.4 Data processing and storage of research documents and data**

##### **11.4.1 Identification of the data processing manager and location(s)**

The bioinformatician will program the data entry software, as well as the consistency checks of the data (delay, limit values, conditional elements, and score calculations).

The proposed software will be validated by the Principal investigator as well as by the study team (methodologist, project manager, statistician, and data manager). The validated application will be available online and could be used for data entry.

The research team members could use the software functionalities for validation and consistency checks of data

The data manager, under the supervision of the reference statistician, will produce a document, the Data Validation Plan (DVP). There, validation rules for the consistencies checks of the data complementary to those initially programmed by the bioinformatician will be described.

By means of one of the statistical software, the data manager will program the controls, and will request clarification of the entries (queries) to the research team (ARCs).

When validation of the data circuit between ARC and data manager will finish, the later will write a Data-management report (controls done, new variables added, unsolved problems). At the end of this stage, a Database Freeze form will be validated and signed by the Principal investigator. The data manager will transfer the data to the statistician for analyses. In exceptional cases, it might be necessary to be back to the database. A « refrozen process » will be done identical to the one described before for the Database Freeze.

Statistical analysis will be performed under the responsibility of Pr Sylvie Chevret.

The data retention period in active database and in archiving will be 2 years after the publication of the research, as indicated in the information notice. This represents, according to the project, a total conservation of the data for 2 years until 2024. The details of this period:

- 14 months and 2 weeks for the study duration: 12 months of inclusion period and 2 months and 2 weeks of follow-up per patient

- 6 months of processing of the database (data-management and statistics) for preparation of the publication of the research. This duration is also justified by several types of complex biological analysis to be carried out at the end of the study.

- 24 months of storage after publication

#### **11.4.2 Data entry**

Data will be entered electronically via a web browser.

The research team will list individuals with software rights and their specific profiles. A profile assigns the software rights and specific roles to users. The data entry will be ensured by persons with specific profiles (data entry, data writing, data consistency checks...).

#### **11.5 Data ownership**

AP-HP is the owner of the data. The data cannot be used or disclosed to a third party without its prior permission.

## **12 STATISTICAL ASPECTS**

### **12.1 General considerations**

Flow-charts will describe the flow of patients during the study, from inclusion until final participation, by randomization arms.

All analyses will be performed under the intention-to-treat (ITT principle), irrespective of the actual treatment of each enrolled patient who will be each analyzed in the group that has been attributed by randomization.

Summary statistics will be used, either frequencies and percentages for categorical variables, or median and interquartile range (IQR) for continuous or discrete variables. Number of missing values will be reported. No statistical tests will be performed between randomization groups in terms of base line characteristics.

Estimation of high-dose dexamethasone effect will be based on the direct comparison of the two randomization arms in the intention-to-treat (ITT) population. We will estimate the effect of high-dose dexamethasone, whatever the dose (20 mg), in comparison to the standard of care+Placebo arm (6 mg). We will secondly assess the treatment by period interaction (using the amendment date of September, 2020, as the threshold for protocol modification related to the standard of care).

Secondly, the estimated effect of the dose of actually administered dose of dexamethasone (either 0, 6, or 20 mg) will be based on the “as-treated” population, using the instrumental variable approach, as detailed below.

Estimation of the effect of the oxygenation, support systems, will be considered separately: HFNO versus standard oxygen, CPAP versus standard oxygen, with control for multiple comparisons based on Bonferroni adjustment (see sample size computation below). Exploratory analyses of the comparative benefit of CPAP versus HFNO will use Bayesian inference (see below), given it allows to quantify the distribution of the difference in outcomes across the two groups, conditionally on the recorded data in the trial.

Interim analyses of efficacy and safety data will use Bayesian monitoring in order to avoid inflation of type I error (see section 12.2.4 for details).

All statistical analyses will be performed using R software (R Foundation for Statistical Computing, Vienna, Austria. <http://www.r-project.org/>) v. 3.6 or later, or SAS software v 9.1.

## **12.2 Planned statistical methods, including the timetable for any planned interim analyses**

### **12.2.1 Analysis of the primary endpoints**

The primary endpoints of the study are time-to-failure endpoints, that will be analyzed using survival methods assuming noninformative right-censoring of the data; this is obviously true for the cumulative incidence of all deaths, whatever the cause, used in the evaluation of corticosteroids; this is also assumed to be true in non-mechanically ventilated patients, due to the fact that no death prior to criteria for MV will be expected. In both cases, no lost to follow up that could be related to the disease will be expected within the first 28 or 60 days after study enrollment. Thus, only administrative censoring at the time of analysis (see below interim analyses) or at day 28 or day 60 (for patients still alive free of failure at that time) will be expected.

Under such assumptions, survival curves will be estimated in each randomization arm according to the Kaplan-Meier method, then compared by the Log-Rank test. Cox models stratified on the patient severity at inclusion (MV or not) will quantify the effect size by hazard ratio with 95% confidence intervals. Subset by treatment interactions will be tested by the Gail and Simon interaction statistics.

Beside the ITT analyses, analysis of the corticosteroids effect, will use an instrumental variable (IV) method in the “as-treated population<sup>1</sup>. The IV approach will be used to assess the magnitude of the as-received treatment effect in contrast to the ITT approach, which focuses on the as-assigned treatment effect, whatever the administered treatment. The use of two models under the IV approach, one relating treatment received to outcome (the AT model), and the other relating randomized intervention assignment to the treatment received, has led many researchers to refer to the IV method as a two-stage estimation procedure. The most common IV in medicine is randomization within a randomized controlled trial that has treatment contamination<sup>2</sup>: IV analysis can bridge the gap between the more policy focused question posed by intention to treat analyses and the patient focused question of biological efficacy. This is particularly well-suited to our setting, where “contamination” refers to the administration of dexamethasone, possibly considering the dose actually administered. Note that the use of predictive covariates in the model relating the randomized intervention to treatment received will increase the precision of the predicted treatment probability that replaces observed treatment received in the IV model for the outcome. Including predictors of outcome in the model for outcome of course reduces the residual error.

### 12.2.2 Analysis of the secondary endpoints

In accordance to the secondary criteria for Dexamethasone versus standard of care,

1. The evolution of the viral load in the respiratory tract will modelled and compared by linear mixed models.
2. The proportions of healthcare-associated infection at day-28 and day-60 will be compared between groups by an exact Fisher test.
3. The number of days alive without mechanical ventilation will be compared between groups by a Wilcoxon rank sum test.
4. The evolution of SOFA-score will modelled and compared by linear mixed models.
5. The number of days alive without renal replacement therapy will be compared between groups by a Wilcoxon rank sum test.
6. The length of ICU and hospital-stay will be compared between groups by a Wilcoxon rank sum test.

---

<sup>1</sup> Sommer A, Zeger S. On estimating efficacy from clinical trials. *Statistics in Medicine* 1991;10:45– 52. [PubMed: 2006355]

<sup>2</sup> Sussman JB. An IV for the RCT: using instrumental variables to adjust for treatment contamination in randomised controlled trials. *BMJ*. 2010; 340: c2073.



Secondary analyses comparing (i) HFNO and standard oxygen therapy and (ii) CPAP and standard oxygen therapy

1. The number of days alive without mechanical ventilation will be compared by a Wilcoxon rank sum test.
2. The proportion of healthcare-associated infection at day-28 and day-60 will be compared by an exact Fisher test.
7. The length of ICU and hospital-stay will be compared by a Wilcoxon rank sum test

### **12.2.3 Calculation hypotheses for the number of participants required and the result**

**Computation of sample sizes has been done for each intervention, independently. Based on those computation, it was computed that the trial needs to recruit 550 subjects including 330 patients who were not mechanically-ventilated at inclusion.**

#### **1) Effect of high-dose dexamethasone**

According to the literature, the reported cumulative incidence of death at Day-60 is about 60%.

A two-sided log-rank test with an **overall sample size of 550 subjects** (275 in each group) achieves 80.1% power at a 0.050 significance level to detect a hazard ratio of 0.75 when the proportion surviving in the control group is 0.40 (that is, the survival rate in the Dexamethasone group is expected to be 0.50). The study lasts for 150 days of which subject accrual (entry) occurs in the first 90 days. The accrual pattern across time periods is uniform (all periods equal). No subjects drop out of the control group. No subjects drop out of the treatment group. No patient is assumed to switch from the control group to the other group.

#### **2) In the population of non-severe non-mechanically-ventilated Covid-19 infected patients**

Based on data from the literature, the cumulative incidence of intubation at day 28 is estimated to be 80% in the standard of care group.

Computation was done for each of the two comparisons, using an adjusted type I error rate of 0.025 given the multiple comparisons.

A two-sided log-rank test with an overall sample size of 220 subjects (110 in the control group and 110 in the treatment group) achieves 80.0% power at a 0.025 significance level to detect a hazard ratio of 0.65 when the proportion surviving in the control group is 0.20 (that is, a 28-day cumulative incidence of need for VM of 80% in the control arm versus 65% in the experimental arm). The study lasts for 120 days of which subject accrual (entry) occurs in the first 60 days. The accrual pattern across time periods is uniform (all periods equal). No

subjects drop out of the control group. No subjects drop out of the treatment group. No switches are expected.

Therefore, a total of 110 patients in each of the 3 arms will be required, that is a total of 330 non mechanically ventilated patients at randomization to be included in the trial.

#### **12.2.4 Interim Analyses**

For ethical reasons, clinical trial data will be analyzed repeatedly at any time prior to the formal completion of the trial, as recommended for decades (19), with results presented to the data monitoring committee of the trial. Moreover, when comparing multiple commercially available and perhaps U.S. Food and Drug Administration (FDA)- or European Medicines Agency (EMA)-approved products or treatment strategies against one another via comparative effectiveness research (CER) trial, Bayesian analyses appear particularly well suited (20–22). Indeed, Bayesian approaches to the monitoring of group sequential designs have two main advantages compared with classical group sequential designs (23,24): first, they facilitate the implementation of interim success and futility criteria that are tailored to the subsequent decision making based on explicit probabilistic statements (that may offer strong benefit for their ability to calculate the probability that each treatment is the best or worst) (25), and second, they allow inclusion of prior information on the treatment differences and on the control group, actualized over the trial.

Interim monitoring for success will begin after 50 patients have been enrolled and will be repeated after every additional 50 patients are enrolled. Interim analyses will be stratified on the patient base line severity group, based on the primary outcome measure and main secondary endpoints of each stratum:

- Severe group: survival time, SOFA score
- Moderate group: time to MV criterion, survival

The analyses will therefore rely on computing the posterior distribution of the hazard ratio (main endpoints) or between the experimental and control arms for time-to-event co-primary outcomes and the posterior distributions of event rates in each arm for binary co-primary outcomes. From the latter, the posterior distribution of the difference in event rate will be derived. These posterior distributions will be graphically displayed, and summarized by their medians and 95% credibility intervals (the Bayesian counterparts of confidence intervals).

Noninformative priors will be used, that is the prior distribution for the log hazard ratio will be a Gaussian distribution with mean 0 and variance  $10^6$ . Following Harrel and Lindsell, posterior probabilities will be reported as follows<sup>3</sup>:

|                                         |                                         |
|-----------------------------------------|-----------------------------------------|
| $P1=P(HR < 1 \mid \text{data})$         | Any benefit                             |
| $P2=P(HR < 0.75 \mid \text{data})$      | High-dose DXM benefit                   |
| $P3=P(HR < 0.65 \mid \text{data})$      | Oxygen support benefit                  |
| $P4=P(HR > 1.05 \mid \text{data})$      | More than trivial harm                  |
| $P5=P(0.8 < HR < 1.2 \mid \text{data})$ | Similarity between oxygenation supports |

For this study, action triggers will be:

Stop with evidence for efficacy if  $P1 > 0.95$

Stop with evidence for moderate or greater efficacy if  $P2$  or  $P3 > 0.8$

Stop with evidence for inefficacy if  $P4 > 0.8$

Stop with evidence for harm if  $P5 > 0.75$

Last, once at least 100 patients have been enrolled, and thereafter after every additional 50 patients, we will also assess the presence of any period-by-treatment interaction, by estimating the ratio of the estimated effect in both periods, in a Bayesian setting<sup>4</sup>. Posterior probabilities of such a ratio will be estimated using Markov chain Monte Carlo (MCMC) methods.

The DSMB could be asked to recommend early termination based on results of the safety/efficacy interim analyses.

### 12.2.5 Anticipated level of statistical significance

Final anticipated level of statistical significance is of 0.05.

### 12.2.6 Method for taking into account missing, unused or invalid data

Missing data for the primary endpoint (vital status or ventilation mode), and other endpoints related to the ICU stay are not expected. Indeed, the complete follow up of each enrolled patient is assured by the study's design since the observation period is defined from day 1

<sup>3</sup> <https://hbiostat.org/proj/covid19/bayesplan.html>

<sup>4</sup> Millen BA, Dmitrienko A, Song G. Bayesian assessment of the influence and interaction conditions in multipopulation tailoring clinical trials. J Biopharm Stat. 2014;24(1):94-109.

(randomization) until day 28, ICU discharge, or death, whichever occurs first. For the other endpoints, missing data will be handled by multiple imputation techniques

Missing data will be described on the overall population and by treatment group, and method of handling them according to their frequencies and nature will be used. Sensitivity analysis will confirm reliability of conclusions upon various hypotheses on missing values.

### **12.2.7 Management of modifications made to the analysis plan for the initial strategy**

All major modifications to the planned analysis will be submitted to approval of the scientific committee.

### **12.2.8 Choice of individuals to be included in the analyses**

All primary analyses will follow the Intention-to-treat method. All randomized patients will be analyzed in their allocated group, irrespective of intervention eventually received or lost to follow-up. Deviations from the protocol will be registered as well as the raisons for deviation.

Estimation of administered corticosteroid effect will use the as-treated population, where each patient will be considered in the group (either 0, 6, or 20, mg) of administered dexamethasone.

## **12.3 Metanalysis of individual data of the patients enrolled in the 3 phrc flash**

According to the DGOS suggestion, we planned a meta-analysis of individual data according to the proposal abstracted below:

### **Steroids in ICU Adults with COVID19**

#### **An Individual Patient Data Meta-Analysis**

**COVIDICUS : Pr Jean-François Timsit, Service de Réanimation, Hôpital Bichat, Université de Paris, Paris 75018, France**

**REMAP-CAP COVID-19 : Pr Djillali Annane, Service de Réanimation, Hôpital Raymond Poincaré, Université Versailles Saint Quentin, Garches, 92380, France**

**CAPE-COVID19 : Pr Pierre-François Dequin, Service de Réanimation, Centre Hospitalier Universitaire de Tours, 37 044 Tours, France**

### **Statisticians**

Pr Sylvie Chevret, Service de Biostatistique et Informatique Médicale, Hôpital St Louis, Université Paris Diderot, ECSTRRA Team, CRESS UMR 1153 Paris, 75010, France

Pr Bruno Giraudeau, Service de Biostatistique, Centre Hospitalier Universitaire de Tours, 37 044 Tours, France

### 12.3.1 Introduction

Three clinical trials at the time are scheduled to be performed in ICU patients with COVID19, aiming at evaluating the benefit of corticosteroids in those patients [1,2,3].

The primary objective of this study is to estimate with maximal precision the effects of corticosteroids on 28-day mortality in ICU patients with COVID19, by leveraging (i) the possibility of combining individual patient data from different trials and (ii) the availability of informative baseline data on trial patients. Therefore, we will conduct a study using individual patient data (IPD) from the three trials on low-dose corticosteroids for ICU patients with COVID 19 syndrome. In addition, in order to better personalize the treatment, the second objective of this study is to assess treatment effects according to the drug used, either dexamethasone or hydrocortisone, to modalities of drug administration (bolus versus continuous infusion for hydrocortisone; fixed 7-day treatment duration versus variable duration), to disease severity (ARDS only versus multiple organ dysfunction), and age (< versus > 60-year-old)

### 12.3.2 Methods

#### 12.3.2.1 Study Design

The present study is an individual participant data (IPD) meta-analysis of randomised controlled trials designed to test the hypothesis that short term association of corticosteroids reduces mortality in ICU adults with COVID19. The present meta-analysis will be performed according to the PRISMA-IPD statements (26).

The intention to treat population will be used for all analyses, **including all patients according** to randomised treatment arm regardless of actual treatment.

#### 12.3.2.2 Population

We considered ICU adults with acute hypoxemic respiratory failure (AHRF) COVID19 as defined in individual trials. A summary of the inclusion and exclusion criteria for each individual trial is provided in Table 1.

Table 1: Comparison of eligibility criteria of the trials

|                         | <b>REMAP-CAP COVID-19</b>                                                                                                                                                                                                                                                                                                                                                                                                                                                                                                                                                                                                                    | <b>COVIDICUS</b>                                                                                                                                                                                                                                                                                                                                                                                                                                                                                                                                                                                        | <b>CAPE-COVID19</b>                                                                                                                                                                                                                                                                                                                                                                                                                                                                                                                                                                                                                                                                                                                                                                                                                              |
|-------------------------|----------------------------------------------------------------------------------------------------------------------------------------------------------------------------------------------------------------------------------------------------------------------------------------------------------------------------------------------------------------------------------------------------------------------------------------------------------------------------------------------------------------------------------------------------------------------------------------------------------------------------------------------|---------------------------------------------------------------------------------------------------------------------------------------------------------------------------------------------------------------------------------------------------------------------------------------------------------------------------------------------------------------------------------------------------------------------------------------------------------------------------------------------------------------------------------------------------------------------------------------------------------|--------------------------------------------------------------------------------------------------------------------------------------------------------------------------------------------------------------------------------------------------------------------------------------------------------------------------------------------------------------------------------------------------------------------------------------------------------------------------------------------------------------------------------------------------------------------------------------------------------------------------------------------------------------------------------------------------------------------------------------------------------------------------------------------------------------------------------------------------|
| Main inclusion criteria | <ol style="list-style-type: none"> <li>1. Adult patient admitted to an ICU for acute severe CAP within 48 hours of hospital admission</li> <li>2. symptoms or signs or both that are consistent with lower respiratory tract infection</li> <li>3. AND</li> <li>4. Radiological evidence of new onset infiltrate of infective origin</li> <li>5. Up to 48 hours after ICU admission, receiving organ support with one or more of: <ul style="list-style-type: none"> <li>• Non-invasive or invasive ventilatory support;</li> <li>• vasopressor or inotropes or both</li> </ul> </li> <li>6. Proven/ suspected COVID-19 infection</li> </ol> | <ol style="list-style-type: none"> <li>1. Age <math>\geq</math> 18 years</li> <li>2. Admitted to ICU within 48 hours</li> <li>3. Confirmed or highly suspected COVID-19 infection</li> <li>4. Acute hypoxemic respiratory failure (PaO<sub>2</sub> &lt;70 mmHg or SpO<sub>2</sub>&lt;90% on room air or tachypnea&gt;30/min or labored breathing or respiratory distress; need for oxygen flow <math>\geq</math>6L/min)</li> <li>5. Any treatment intended to treat the SARS-CoV-2 infection.</li> <li>6. Written informed consent from the patient or a legal representative if appropriate</li> </ol> | <ol style="list-style-type: none"> <li>1. <math>\geq</math> 18 years</li> <li>2. Admission to the ICU</li> <li>3. Lab confirmation of SARS-CoV-2 infection</li> <li>4. Focal shadowing/infiltrate on chest X-ray or CT-scan</li> <li>5. At least one of the following: <ul style="list-style-type: none"> <li>• Mechanical ventilation (PEEP <math>\geq</math> 5 cm H<sub>2</sub>O)</li> <li>• High-flow oxygen therapy with a FiO<sub>2</sub> <math>\geq</math> 50% and a P/F &lt; 300</li> <li>• Non--rebreathing mask oxygen therapy with an estimated P/F ratio &lt; 300 (tables)</li> <li>• Pneumonia Severity Index (PSI) &gt; 130</li> </ul> </li> <li>6. Study drug infusion initiated no longer than 24 hours post first severity criterion</li> <li>7. Patient receiving an anti-viral therapy</li> <li>8. Informed consent</li> </ol> |
|                         |                                                                                                                                                                                                                                                                                                                                                                                                                                                                                                                                                                                                                                              | <ol style="list-style-type: none"> <li>1. Moribund status</li> <li>2. Pregnancy or breastfeeding</li> <li>3. Long term corticotherapy at a dose of 0.5mg/kg/j or higher</li> <li>4. Active and untreated bacterial, fungal or parasitic infection</li> </ol>                                                                                                                                                                                                                                                                                                                                            | <ol style="list-style-type: none"> <li>1. Cystic fibrosis</li> <li>2. Co-infection with flu (rapid PCR-test)</li> <li>3. Active tuberculosis or fungal infection</li> <li>4. Active viral hepatitis or active infection with herpes viruses</li> <li>5. Patient needing anti-inflammatory corticosteroids or substitutive hydrocortisone for any reason.</li> <li>6. Patient already enrolled in another trial with ventilator-free days as endpoint</li> <li>7. Pregnant or breastfeeding woman</li> <li>8. Patient on judicial protection</li> </ol>                                                                                                                                                                                                                                                                                           |

### **12.3.2.3 Interventions**

The experimental interventions considered for this analysis corticosteroids, with three possible drug regimens: (a) Dexamethasone IV (14mg D1-D5 then 4mg D6-D10), (b) low dose hydrocortisone (200mg of intravenous (bolus q6 or continuous infusion) hydrocortisone daily for 7 days or variable duration ), or (c) placebo or usual care.

### **12.3.2.4 Outcomes**

We considered 28-day mortality as the primary outcome. The secondary outcomes will be mortality at 90 days and at discharge, cumulative incidence of a SOFA score <8, of vasopressor, of organ free days (vasopressor free days, mechanical ventilation free days, renal replacement free days et ICU free days), and of mechanical ventilation withdrawal, as well as length of stay in ICU and in hospital. We also analysed the rate of superinfection, as defined by any new infection occurring  $\geq 48$  hours after randomization, acquired ICU muscle weakness.

### **12.3.2.5 Statistical Analysis**

Common variables from all three datasets will be gathered and combined to conduct the analysis. All analyses will be performed on an intent-to-treat basis. Baseline patient characteristics will be presented by study and treatment group. For continuous variables, mean and standard deviation (SD) or median and interquartile range (IQR) will be reported as descriptors of central tendency, as appropriate. For categorical variables, the number of observations in each category and corresponding proportions are reported. Patient characteristics across groups will be contrasted using nonparametric Kruskal-Wallis tests for continuous variables and chi-square or Fisher exact tests for categorical variables.

We will consider of primary interest the comparison between either hydrocortisone or dexamethasone and either standard of care or placebo. Pre-specified secondary analyses included all possible pairwise comparisons, namely hydrocortisone versus control, dexamethasone versus control, and hydrocortisone versus dexamethasone.

For direct comparisons, we will conduct a conventional meta-analysis to synthesize the results, using random-effects models and fixed-effects models as sensitivity analyses. We will estimate the average treatment effect adjusting for study, age, baseline CRP, Simplified Acute Physiology Score (SAPS2) and SOFA score at baseline, and initial need for mechanical ventilation. Many of these covariates are highly associated with mortality, rendering substantial the potential for increased efficiency. For each outcome of interest, the

average treatment effect will be described using a hazard ratio (HR) estimate along with a corresponding 95% CI and p-value. The presence of qualitative interactions between treatment effect and baseline characteristics will be investigated using the Gail and Simon interaction test.

Secondly, we will combine direct and indirect comparisons via a network meta-analysis using the hierarchical model of Lu and Ades (27) with a Bayesian approach. In a Bayesian framework, estimates are based on the posterior distribution of the endpoint and are called credible intervals (Cis). Usually, the 95% CI corresponding to the interval that has a posterior probability of 95% that the endpoint lies within it. Unlike the frequentist approach, the Bayesian approach does not allow the calculation of the p value. Conclusions are drawn from whether or not 1 (which corresponds to a no-difference relative risk) or 0 (which corresponds to no mean differences) belongs to the credible interval. We will use Markov Chain Monte Carlo to implement the model.

All tests will be two-sided and conducted at significance level 0.05. All analyses will be performed in the R statistical environment running on a Mac OS X platform.

#### **12.3.2.6 References**

1. REMAP-CAP COVID-19 (NCT02735707)
2. CAPE-COVID19
3. COVIDICUS
4. Annane D, Bellissant E, Bollaert PE, et al. Corticosteroids for treating sepsis. Cochrane Database Syst Rev 2015;:CD002243. doi:10.1002/14651858.CD002243.pub3

## **13 QUALITY CONTROL AND ASSURANCE**

Every research project involving human participants managed by AP-HP is ranked according to the projected risk incurred by study participants using the classification system specific to AP-HP sponsored interventional research involving human participants.

### **13.1 General organisation**

The sponsor must ensure the safety and respect of individuals who have agreed to participate in the study. The sponsor must implement a quality assurance system to best monitor the implementation of the study in the investigation centres.



For this purpose, the sponsor shall assign Clinical Research Associates (CRA) whose primary role is to carry out regular follow-up visits at the study locations, after having carried out the initial visits.

The purpose of monitoring the study, as defined in Good Clinical Practices (GCP section 5.18.1), is to verify that:

- the rights, safety and protection of the research participants are met
- the data reported are exact, complete and consistent with the source documents
- the study is carried out in accordance with the protocol in force, the GCPs and the statutory and regulatory provisions in force

### **13.1.1 Strategy for centre opening**

The strategy for opening the centres established for this study is determined using the appropriate monitoring plan.

### **13.1.2 Scope of centre monitoring**

In the case of this D risk study the appropriate monitoring level has been determined based on the complexity, the impact and the budget for the study. Therefore, in agreement with the coordinating investigator, the sponsor has determined the logistical score and impact, resulting in a study monitoring level to be implemented: **HIGH** level.

## **13.2 Quality control**

A Clinical Research Associate (CRA) appointed by the sponsor will be responsible for the good completion of the study, for collecting, documenting, recording and reporting all handwritten data, in accordance with the Standard Operating Procedures applied within the DRCI (Clinical Research and Innovation Department) and in accordance with Good Clinical Practices as well as the statutory and regulatory requirements.

The investigator and the members of the investigator's team agree to make themselves available during regular Quality Control visits carried out by the Clinical Research Associate. During these visits, the following elements will be reviewed depending on the monitoring level:

- written consent
- compliance with the study protocol and with the procedures defined therein
- quality of the data collected in the case report form: accuracy, missing data, consistency of the data with the "source" documents (medical files, appointment books, original copies of laboratory results, etc.)
- management of the treatments used

### **13.3 Case report forms**

All information required by the protocol must be entered in the case report forms. The data must be collected as and when they are obtained, and clearly recorded in these case report forms. Any missing data must be coded.

Every site will have access to the electronic case report forms via a web-based data collection system. Investigators will be given a document offering guidance on using this tool. When the investigators complete the case report form via the Internet, the CRA can view the data quickly and remotely. The investigator is responsible for the accuracy, quality and relevance of all the data entered. In addition, the data are immediately verified as they are entered, thanks to consistency checks. To this end, the investigator must validate any changes to the values in the case report form. An audit trail will be kept of all changes. A justification can be added when applicable, as a comment.

A print-out, authenticated (signed and dated) by the investigator, will be requested at the end of the study. The investigator must archive a copy of the authenticated document that was issued to the sponsor.

### **13.4 Management of non-compliances**

Any events that occur as a result of non-compliance – by the investigator or any other individual involved in running the study – with the protocol, standard operating procedures, good clinical practices or statutory and regulatory requirements must be recorded in a declaration of non-compliance and sent to the sponsor.

These non-compliances will be managed in accordance with the sponsor's procedures.

### **13.5 Audits/inspections**

The investigators agree to consent to the quality assurance audits carried out by the sponsor as well as the inspections carried out by the competent authorities. All data, documents and reports may be subject to regulatory audits and inspections. These audits and inspections cannot be refused on the grounds of medical secrecy.

An audit can be carried out at any time by individuals appointed by the sponsor and independent of those responsible for the research. The aim of the audits is to ensure the quality of the study, the validity of the results and compliance with the legislation and regulations in force.

The persons who manage and monitor the study agree to comply with the sponsor's requirements and with the competent authority regarding study audits or inspections.

The audit may encompass all stages of the study, from the development of the protocol to the publication of the results, including the storage of the data used or produced as part of the study.

### **13.6 Principal Investigator's commitment to assume responsibility**

Before starting the study, each investigator will give the sponsor's representative a copy of his/her updated personal *curriculum vitae*, signed and dated less than one year, with his/her RPPS number (*Répertoire Partagé des Professionnels de Santé*, Collective Database of Health Professionals). The CV must include any previous involvement in clinical research and related training.

Each investigator will commit to comply with legislation and to conduct the study in line with GCP, in accordance with the Declaration of Helsinki.

The Principal Investigator at each participating site will sign a commitment of responsibility (standard DRCI document) which will be sent to the sponsor's representative.

The investigators and their staff will sign a delegation of duties form specifying each person's role and will provide their CVs.

## **14 ETHICAL AND LEGAL CONSIDERATIONS**

### **14.1 Methods for informing research participants and obtaining their consent**

In accordance with Article L1122-1-1 of the Code de la Santé Publique (French Public Health Code), no interventional research involving human participants can be carried out on a person without his/her freely given and informed consent, obtained in writing after the person has been given the information specified in Article L.1122-1 of the aforementioned Code.

The person's freely-given, written, informed consent will be obtained by the principal investigator or a physician representing the investigator before the person is enrolled in the study. The consent is obtained when the patient arrive in ICU before the randomisation.

A copy of the information note and consent form, signed and dated by the research participant and by the principal investigator or the physician representing the investigator will be given to the individual prior to their participation in the study. The principal investigator or the physician representing him/her will keep a copy.

At the end of the study, one copy will be placed in a tamper-proof sealed envelope containing all the consent forms. This envelope will be archived by the sponsor.

In addition, the investigator will specify in the person's medical file the person's participation in the research, the procedures for obtaining his/her consent or consent from any other person in the cases set forth by Articles L. 1122-1-1 to L. 1122-2 of the Code de la Santé Publique (French Public Health Code) as well as the methods used for providing information for the purpose of collecting it. The investigator will retain one copy of the signed and dated consent form.

For patients who are unable to give consent and patients under guardianship/legal protection, in accordance with Article L.1122-2 CSP, the consent of a relative or support person will be required, if they are present.

But if the relative or support person is not present or no existing, the emergency inclusions will be allowed in accordance to the French Public Health Code, article L1122-1-3, because, in this research protocol, the condition of the patient upon arrival in the ICU requires the protocol's treatment strategy.

And the relative or support person will be informed as soon as possible and a new consent will be required for the pursuit of this research. The relative or support person and the concerned person may also oppose to the use of his data in the research.

And the concerned person will be informed as soon as possible and a new consent will be required for the pursuit of this research. The patient may also oppose to the use of his data in the research

Special circumstances: If the person is physically unable to give his or her written consent, consent may be witnessed, in descending order of priority, from a trustworthy person, a family member or a close relative. These persons must be fully independent of the investigator and of the sponsor.

#### ***14.2 Prohibition from participating in another clinical study or exclusion period set after the study***

The participant may not enrol in another interventional study protocol involving human participants for the duration of his or her participation without consulting with the physician monitoring him or her in the context of the study. They will be allowed to participate to non-interventional research (cat 3) at any time during the trial.

### **14.3 Authorisation for the research location**

The study will be carried out in treatment units on individuals presenting a clinical condition for which the units are specialised and who require interventions that are routinely performed at those units. Therefore, the research location does not require specific authorisation.

### **14.4 Legal obligations**

#### **14.4.1 Role of the sponsor**

Assistance Publique - Hôpitaux de Paris (AP-HP) is the sponsor of this study and, by delegation, the DRCI (Clinical Research and Innovation Department) carries out the study's missions in accordance with Article L.1121-1 of the *Code de la Santé Publique* (French Public Health Code). Assistance Publique - Hôpitaux de Paris reserves the right to halt the study at any time for medical or administrative reasons. In this case, notification will be sent to the investigator.

#### **14.4.2 Request for approval from the CPP (Research Ethics Committee)**

Prior to starting the study, AP-HP, as sponsor, must obtain for this interventional study involving human participants concerning a medicinal product for human use, approval from the appropriate CPP (Research Ethics Committee), within the scope of its authority and in accordance with in force legislation and regulatory requirements.

#### **14.4.3 Request for authorisation from ANSM**

Prior to starting the study, AP-HP, as sponsor, must obtain authorisation from the ANSM (French Health Products Safety Agency) for the interventional study involving human participants concerning a medicinal products for human use, within the scope of the ANSM's authority and in accordance with in force legislation and regulatory requirements.

#### **14.4.4 Procedures relating to data protection regulations**

The computer file used for this research is implemented in accordance with French (amended "Informatique et Libertés" law governing data protection) and European (General Data Protection Regulation – GDPR) regulations.

- Request for authorisation by the CNIL (French Data Protection Agency)

This research is not governed by the CNIL "Reference Method" (MR-001) because inclusion due to an emergency situation without collection of consent at the time of inclusion and collect of social security numbers/NIRs.

The sponsor must obtain the authorisation of the CNIL (French Data Protection Agency) before implementing any data processing involving the data required to conduct the research.

An informed consent is given to patients before their inclusion in the study, which details the procedures taken by the sponsor about the regulation GDPR.

The processing of data collected in this study is in accordance with the patients' rights conferred by this law. (See informed consent)

#### **14.4.5 Amendments to the research**

Any substantial modification to the protocol by the coordinating investigator must be sent to the sponsor for approval. After approval is given, the sponsor must obtain, approval from the CPP (Research Ethics Committee) and authorisation from the ANSM within the scope of their respective authorities, before the amendment can be implemented.

The information note and the consent form can be revised if necessary, in particular in case of a substantial amendment to the study or if adverse reactions occur.

#### **14.4.6 Final study report**

The final report for the research involving human participants referred to in Article R1123-67 of the *Code de la Santé Publique* (French Public Health Code) is written and signed by the sponsor and the investigator. A report summary drafted according to the reference plan of the competent authority must be sent to the competent authority within a period of one year following the end of the study, i.e., the end of the participation of the last participant in the study.

#### **14.4.7 Archiving**

Specific documents for an interventional study involving human participants concerning a medicinal product for human use will be archived by the investigator and the sponsor for 15 years after the end of the research.

This indexed archiving includes, in particular:

- A sealed envelope for the investigator containing a copy of all the information notes and consent forms signed by all individuals at the centre who participated in the study;
- A sealed envelope for the sponsor, containing a copy of all the information notes and consent forms signed by all individuals at the centre who participated in the study;
- "Study" binders for the Investigator and the sponsor, including (non-exhaustive list) :

- the successive versions of the protocol (identified by the version number and its date), and any appendices
  - the ANSM authorisations and CPP (Research Ethics Committee) decisions
  - any correspondence
  - the enrolment list or register
  - the appendices specific to the research
  - final study report
- The data collection documents

## **15 FUNDING AND INSURANCE**

### **15.1 Funding sources**

The research was funded by a grant from Programme Hospitalier de Recherche Clinique - PHRC 2020 (Ministère de la Santé)

### **15.2 Insurance**

For the duration of the study, the Sponsor will take out an insurance policy covering the sponsor's own public liability, as well as the public liability for all the physicians involved in the study. The sponsor will also provide full compensation for any damages caused by the study to the participant enrolled and their beneficiaries, unless the sponsor can prove that the harm is not the fault of the sponsor or any collaborator. Compensation cannot be refused on the grounds of a third-party act or the voluntary withdrawal of the person who initially consented to participate in the study.

Assistance Publique-Hôpitaux de Paris (AP-HP) has taken out insurance with HDI-GLOBAL SE through the insurance broker BIOMEDIC-INSURE for the full study period, which covers its own public liability and that of any collaborator (physician or research staff), in accordance with Article L.1121-10 of the *Code de la Santé Publique* (French Public Health Code).

## **16 PUBLICATION RULES**

### ***16.1 Mention of AP-HP affiliation for projects sponsored by AP-HP***

The following terms will be used for any publication relative to this research:

**AP-HP, hospital, department, city, postcode, France**

### **16.2 Mention of the sponsor AP-HP (DRCI) in the acknowledgements of the text**

The following sentence will be used for any publication relative to this research in the acknowledgments:

"The sponsor was *Assistance Publique – Hôpitaux de Paris* (Clinical Research and Innovation Delegation)"

### **16.3 Mention of the financial backer in the acknowledgements of the text**

The following sentence will be used for any publication relative to this research in the financial acknowledgement: The research was funded by a grant from Programme Hospitalier de Recherche Clinique - PHRC 2020 (Ministère de la Santé)

**This study has been registered on the website <http://clinicaltrials.gov/> under number NCT 04344730**

## **17 BIBLIOGRAPHY**

1. Pham TMT, O'Malley L, Mayfield S, Martin S, Schibler A. The effect of high flow nasal cannula therapy on the work of breathing in infants with bronchiolitis: The effect of HFNC on WOB in Bronchiolitis. *Pediatr Pulmonol*. juill 2015;50(7):713-20.
2. Cuquemelle E, Pham T, Papon J, Louis B, Danin P, Brochard L. Heated and humidified high-flow oxygen therapy reduces discomfort during hypoxemic respiratory failure. *Respir Care*. 2012;57:1571-7.
3. Frat J, Thille A, Mercat A, Girault C, Ragot S, Perbet S, et al. High-flow oxygen through nasal cannula in acute hypoxemic respiratory failure. *N Engl J Med*. 2015;372:2185-96.
4. Katz JA, Marks JD. Inspiratory work with and without continuous positive airway pressure in patients with acute respiratory failure. *Anesthesiology*. déc 1985;63(6):598-607.
5. Delclaux C, L'Her E, Alberti C, Mancebo J, Abroug F, Conti G, et al. Treatment of acute hypoxemic nonhypercapnic respiratory insufficiency with continuous positive airway pressure delivered by a face mask: A randomized controlled trial. *JAMA*. 2000;284:2352-60.
6. COVID-19 et soins critiques [Internet]. FUN-MOOC. [cité 22 mars 2020]. Disponible sur: [//www.fun-mooc.fr/courses/course-v1:UPEC+169003+cv\\_01/about](http://www.fun-mooc.fr/courses/course-v1:UPEC+169003+cv_01/about)
7. Carreaux G, Millán-Guilarte T, De Prost N, Razazi K, Abid S, Thille A, et al. Failure of Noninvasive Ventilation for De Novo Acute Hypoxemic Respiratory Failure: Role of Tidal Volume. *Crit Care Med*. 2015;
8. Brochard L, Slutsky A, Pesenti A. Mechanical Ventilation to Minimize Progression of Lung Injury in Acute Respiratory Failure. *Am J Respir Crit Care Med*. 15 févr 2017;195(4):438-42.



9. Rochwerg B, Brochard L, Elliott MW, Hess D, Hill NS, Nava S, et al. Official ERS/ATS clinical practice guidelines: noninvasive ventilation for acute respiratory failure. *Eur Respir J*. août 2017;50(2):1602426.
10. Lescure F-X, Bouadma L, Nguyen D, Parisey M, Wicky P-H, Behillil S, et al. Clinical and virological data of the first cases of COVID-19 in Europe: a case series. *Lancet Infect Dis* [Internet]. mars 2020 [cité 1 avr 2020]; Disponible sur: <https://linkinghub.elsevier.com/retrieve/pii/S1473309920302000>
11. Joynt GM, Wu WK. Understanding COVID-19: what does viral RNA load really mean? *Lancet Infect Dis* [Internet]. mars 2020 [cité 1 avr 2020]; Disponible sur: <https://linkinghub.elsevier.com/retrieve/pii/S1473309920302371>
12. Wu C, Chen X, Cai Y, Xia J, Zhou X, Xu S, et al. Risk Factors Associated With Acute Respiratory Distress Syndrome and Death in Patients With Coronavirus Disease 2019 Pneumonia in Wuhan, China. *JAMA Intern Med* [Internet]. 13 mars 2020 [cité 26 mars 2020]; Disponible sur: <https://jamanetwork.com/journals/jamainternalmedicine/fullarticle/2763184>
13. Villar J, Ferrando C, Martínez D, Ambrós A, Muñoz T, Soler JA, et al. Dexamethasone treatment for the acute respiratory distress syndrome: a multicentre, randomised controlled trial. *Lancet Respir Med*. mars 2020;8(3):267-76.
14. Fung S-Y, Yuen K-S, Ye Z-W, Chan C-P, Jin D-Y. A tug-of-war between severe acute respiratory syndrome coronavirus 2 and host antiviral defence: lessons from other pathogenic viruses. *Emerg Microbes Infect*. 1 janv 2020;9(1):558-70.
15. Liu T, Zhang, Yang. The potential role of IL-6 in monitoring severe case of coronavirus disease 2019. Disponible sur: <https://www.medrxiv.org/content/10.1101/2020.03.01.20029769v2>
16. Azoulay E, Lemiale V, Mokart D, Nseir S, Argaud L, Pène F, et al. Effect of High-Flow Nasal Oxygen vs Standard Oxygen on 28-Day Mortality in Immunocompromised Patients With Acute Respiratory Failure: The HIGH Randomized Clinical Trial. *JAMA*. 27 nov 2018;320(20):2099.
17. Bouadma L, Lescure F-X, Lucet J-C, Yazdanpanah Y, Timsit J-F. Severe SARS-CoV-2 infections: practical considerations and management strategy for intensivists. *Intensive Care Med*. avr 2020;46(4):579-82.
18. Annane D, Renault A, Brun-Buisson C, Megarbane B, Quenot J-P, Siami S, et al. Hydrocortisone plus Fludrocortisone for Adults with Septic Shock. *N Engl J Med*. mars 2018;378(9):809-18.
19. Jennison C, Turnbull BW. Statistical Approaches to Interim Monitoring of Medical Trials: A Review and Commentary. *Stat Sci*. août 1990;5(3):299-317.
20. Connor JT, Elm JJ, Broglio KR. Bayesian adaptive trials offer advantages in comparative effectiveness trials: an example in status epilepticus. *J Clin Epidemiol*. août 2013;66(8):S130-7.
21. Gsponer T, Gerber F, Bornkamp B, Ohlssen D, Vandemeulebroecke M, Schmidli H. A practical guide to Bayesian group sequential designs. *Pharm Stat*. janv 2014;13(1):71-80.
22. Ryan EG, Bruce J, Metcalfe AJ, Stallard N, Lamb SE, Viele K, et al. Using Bayesian adaptive designs to improve phase III trials: a respiratory care example. *BMC Med Res*

Methodol [Internet]. déc 2019 [cité 1 avr 2020];19(1). Disponible sur: <https://bmcmmedresmethodol.biomedcentral.com/articles/10.1186/s12874-019-0739-3>

23. Berry SM, Berry DA. Accounting for Multiplicities in Assessing Drug Safety: A Three-Level Hierarchical Mixture Model. *Biometrics*. juin 2004;60(2):418-26.
24. Spiegelhalter DJ, Freedman LS, Parmar MKB. Bayesian Approaches to Randomized Trials. *J R Stat Soc Ser A Stat Soc*. 1994;157(3):357.
25. Jacob L, Uvarova M, Boulet S, Begaj I, Chevret S. Evaluation of a multi-arm multi-stage Bayesian design for phase II drug selection trials – an example in hemato-oncology. *BMC Med Res Methodol* [Internet]. déc 2016 [cité 1 avr 2020];16(1). Disponible sur: <http://bmcmmedresmethodol.biomedcentral.com/articles/10.1186/s12874-016-0166-7>
26. Moher D, Liberati A, Tetzlaff J, Altman DG, The PRISMA Group. Preferred Reporting Items for Systematic Reviews and Meta-Analyses: The PRISMA Statement. *PLoS Med*. 21 juill 2009;6(7):e1000097.
27. Lu G, Ades AE. Combination of direct and indirect evidence in mixed treatment comparisons. *Stat Med*. 30 oct 2004;23(20):3105-24.

Berry DA. Bayesian statistics and the efficiency and ethics of clinical trials. *Stat Sci*. 2004;19:175–87.

Berry SM, Carlin BP, Lee JJ, Muller P. Bayesian adaptive methods for clinical trials. Chapter 5. Boca Raton: CRC Press; 2011

Connor JT, Elm JJ, Broglio KR, and for the ESETT and ADAPT-IT Investigators. Bayesian adaptive trials offer advantages in comparative effectiveness trials: an example in status epilepticus. *Journal of Clinical Epidemiology*. 2013;66:S130-S137.

Gsponer T, Gerber F, Bornkamp B, Ohlssen D, Vandemeulebroecke M, Schmidli H. A practical guide to Bayesian group sequential designs. *Pharmaceut. Stat*. 2014;13:71-80.

Jacob L, Uvarova M, Boulet S, Bega I, Chevret S. Evaluation of a multi-arm multi-stage Bayesian design for phase II drug selection trials – an example in hemato-oncology. *BMC Medical Research Methodology*. 2016;16:67.

Jennison C, Turnbull BW. Statistical approaches to interim monitoring of medical trials: a review and commentary. *Stat Sci*. 1990;5:299-317.

Kopp-Schneider A, Wiesenfarth M, Witt R, Edelmann D, Witt O, Abel U. Monitoring futility and efficacy in phase II trials with Bayesian posterior distributions—A calibration approach. *Biometrical Journal*. 2019;61:488–502.

Lakatos, Edward. Sample Sizes Based on the Log-Rank Statistic in Complex Clinical Trials. *Biometrics*, 1988; 44: 229-241.

Lakatos, Edward. Designing Complex Group Sequential Survival Trials', *Statistics in Medicine*. 2002; 21: 1969-1989.

PASS 15 Power Analysis and Sample Size Software (2017). NCSS, LLC. Kaysville, Utah, USA, [ncss.com/software/pass](http://ncss.com/software/pass).

Ryan EG, Bruce J, Metcalfe AJ, et al. Using Bayesian adaptive designs to improve phase III trials: a respiratory care example. *BMC Medical Research Methodology*. 2019;(1).

Spiegelhalter DJ, Freedman LS, Parmar MKB. Bayesian approaches to randomized trials (with discussion). *J R Stat Soc, Ser A*. 1994;157:357–416.

Annane D, Renault A, Brun-Buisson C, Megarbane B, Quenot J-P, Siami S, et al. Hydrocortisone plus Fludrocortisone for Adults with Septic Shock. *N Engl J Med*. mars 2018;378(9):809-18

# 18 LIST OF ADDENDA

## 18.1 Serious Adverse Events notification form

|                                                                                                                                                      |                                                                                                                                                                                          |                                                                                                |
|------------------------------------------------------------------------------------------------------------------------------------------------------|------------------------------------------------------------------------------------------------------------------------------------------------------------------------------------------|------------------------------------------------------------------------------------------------|
| Direction de l'Organisation Médicale et des relations avec les Universités (DOMU)<br><br>Délégation à la Recherche Clinique et à l'Innovation (DRCI) |                                                                                                         | PARTIE RESERVEE AU PROMOTEUR<br><br>REFERENCE VIGILANCE :<br><br>Référence GED : REC-DTYP-0192 |
|                                                                                                                                                      | <b>Formulaire de notification d'un Evènement Indésirable Grave (EIG) survenant au cours d'une recherche impliquant la personne humaine portant sur un Médicament ou produit assimilé</b> |                                                                                                |

Dès la prise de connaissance de l'EIG par l'investigateur, ce formulaire doit être dûment complété (3 pages), signé et retourné **sans délai** au secteur Vigilance de la DRCI par mail ([eig-vigilance.drc@aphp.fr](mailto:eig-vigilance.drc@aphp.fr))

Il est possible de transmettre les formulaires de notification d'EIG au secteur Vigilance par **télécopie** au **+33 (0)1 44 84 17 99** **uniquement** en cas de tentative infructueuse d'envoi par mail afin d'éviter les doublons.

Notification initiale  Suivi d'EIG  N° du suivi |\_|\_|

|                                                                                                                                 |                                                                                                          |
|---------------------------------------------------------------------------------------------------------------------------------|----------------------------------------------------------------------------------------------------------|
| <b>1. Identification de la recherche</b>                                                                                        |                                                                                                          |
| Acronyme : <b>COVIDICUS</b>                                                                                                     | Date de notification :  _ _ _ _ _ _ _ _2_ _0_ _ _ _ <br>jj mm aaaa                                       |
|  Recherche prioritaire sur COVID-19            | Date de prise de connaissance de l'EIG par l'investigateur :  _ _ _ _ _ _ _ _2_ _0_ _ _ _ <br>jj mm aaaa |
| Code de la Recherche : <b>APHP 200388</b>                                                                                       |                                                                                                          |
| Risque : <b>D</b>                                                                                                               |                                                                                                          |
| Titre complet de la recherche :<br><b>"Dexamethasone and oxygen support strategies in ICU patients with Covid-19 pneumonia"</b> |                                                                                                          |

|                                                  |                                    |
|--------------------------------------------------|------------------------------------|
| <b>2. Identification du centre investigateur</b> |                                    |
| Nom de l'établissement : .....                   | Investigateur (nom/prénom) : ..... |
| Ville et code postal : .....                     | Tél : ..... Fax : .....            |
| Service : .....                                  |                                    |

|                                                                                                                                                              |                                                                                                                                                                                                                                                                                                                                                                                                                                                                                                     |                                                      |
|--------------------------------------------------------------------------------------------------------------------------------------------------------------|-----------------------------------------------------------------------------------------------------------------------------------------------------------------------------------------------------------------------------------------------------------------------------------------------------------------------------------------------------------------------------------------------------------------------------------------------------------------------------------------------------|------------------------------------------------------|
| <b>3. Identification et antécédents de la personne se prêtant à la recherche</b>                                                                             |                                                                                                                                                                                                                                                                                                                                                                                                                                                                                                     |                                                      |
| Référence de la personne :  _ _ _ _  -  _ _ _ _ _ _  -  _ _  -  _ _ <br><small>n°centre - n° ordre de sélection - initiale - initiale<br/>nom prénom</small> | Antécédents médicaux-chirurgicaux/familiaux pertinents pour l'évaluation du cas (joindre un CRH anonymisé le cas échéant) :<br>.....<br>.....<br>.....<br>.....                                                                                                                                                                                                                                                                                                                                     |                                                      |
| Sexe : <input type="checkbox"/> M <input type="checkbox"/> F                                                                                                 |                                                                                                                                                                                                                                                                                                                                                                                                                                                                                                     | Date de naissance :  _ _ _ _ _ _ _ _ _ _ <br>mm aaaa |
| Poids :  _ _ _ _  kg                                                                                                                                         |                                                                                                                                                                                                                                                                                                                                                                                                                                                                                                     | Age :  _ _ _ _  ans                                  |
| Taille :  _ _ _ _  cm                                                                                                                                        |                                                                                                                                                                                                                                                                                                                                                                                                                                                                                                     |                                                      |
| Date de signature du consentement :  _ _ _ _ _ _ _ _ _ _ <br>jj mm aaaa                                                                                      |                                                                                                                                                                                                                                                                                                                                                                                                                                                                                                     |                                                      |
| Date de randomisation :  _ _ _ _ _ _ _ _ _ _ <br>jj mm aaaa                                                                                                  | Pour les patients non-ventilés :<br><input type="checkbox"/> Groupe DXM-O2 <input type="checkbox"/> Groupe DXM-CPAP <input type="checkbox"/> Groupe DXM-HFNO<br><input type="checkbox"/> Groupe Placebo-O2 <input type="checkbox"/> Groupe Placebo -CPAP <input type="checkbox"/> Groupe Placebo -HFNO<br>Pour les patients déjà ventilés :<br><input type="checkbox"/> Groupe DXM <input type="checkbox"/> Groupe Placebo<br>N° randomisation (si nécessaire) :    N° traitement (si nécessaire) : |                                                      |

|                                                                                                                                                                            |
|----------------------------------------------------------------------------------------------------------------------------------------------------------------------------|
| <b>4. Médicament(s) expérimental(aux) (ME) ou produit(s) assimilé(s) [préciser le(s)quel(s)] avant la survenue de l'EIG</b><br>(barrer l'encadré si traitement non débuté) |
|----------------------------------------------------------------------------------------------------------------------------------------------------------------------------|

**PARTIE RESERVEE AU PROMOTEUR**  
**REFERENCE VIGILANCE :**

Référence GED : REC-DTYP-0185

| Nom commercial (de préférence) ou Dénomination Commune Internationale | Voie <sup>(1)</sup> | Posologie (préciser l'unité ex : mg/j) | Date de début (jj/mm/aaaa) | En cours <sup>(2)</sup>  | Date de fin (jj/mm/aaaa) |
|-----------------------------------------------------------------------|---------------------|----------------------------------------|----------------------------|--------------------------|--------------------------|
| Administration de la DEXAMETHASONE de J1 à J5                         | ...IV...            | 14 mg/j                                | _ _ _ _ _ _2_ _0_ _ _      | <input type="checkbox"/> | _ _ _ _ _ _2_ _0_ _ _    |
| Administration de la DEXAMETHASONE de J6 à J10                        | ...IV...            | 4 mg/j                                 | _ _ _ _ _ _2_ _0_ _ _      | <input type="checkbox"/> | _ _ _ _ _ _2_ _0_ _ _    |
| Administration du Placebo : NaCl 0,9% .....                           | ...IV...            | .....                                  | _ _ _ _ _ _2_ _0_ _ _      | <input type="checkbox"/> | _ _ _ _ _ _2_ _0_ _ _    |

| 5. Procédures et actes ajoutés par la recherche (ex. : biopsies, IRM ...)<br>(barre l'encadré si procédures et actes non réalisés) | Date de réalisation (jj/mm/aaaa) | Chronologie                |                            |
|------------------------------------------------------------------------------------------------------------------------------------|----------------------------------|----------------------------|----------------------------|
|                                                                                                                                    |                                  | Avant la survenue de l'EIG | Après la survenue de l'EIG |
| Mise en place du système d'oxygénation : HFNO, CPAP, Oxygénation conventionnelle.                                                  | _ _ _ _ _ _2_ _0_ _ _            | <input type="checkbox"/>   | <input type="checkbox"/>   |
| .....                                                                                                                              | _ _ _ _ _ _2_ _0_ _ _            | <input type="checkbox"/>   | <input type="checkbox"/>   |

**COVIDICUS** Erreur ! Source du renvoi introuvable.

Référence de la personne se prêtant à la recherche : |\_|\_|\_|\_| - |\_|\_|\_|\_| - |\_| - |\_|

n°centre - n° ordre de sélection - initiale - initiale  
 nom prénom

**6. Médicament(s) concomitant(s) au moment de l'EIG, à l'exclusion de ceux utilisés pour traiter l'événement indésirable**  
 (compléter le tableau ci-après et si nécessaire l'annexe relative aux médicaments concomitants ou barrer l'encadré si non applicable)

⇒ Annexe jointe au présent formulaire :  Oui  Non

| Nom commercial (de préférence) ou Dénomination Commune Internationale | Voie <sup>(1)</sup> | Posologie (préciser l'unité ex : mg/j) | Dates d'administration (du jj/mm/aa au jj/mm/aa) | En cours <sup>(2)</sup>  | Indication | Action prise<br>0 : poursuite sans modification de la posologie<br>1 : arrêt<br>2 : diminution de la posologie<br>3 : augmentation de la posologie<br>4 : ne sais pas | Causalité de l'EIG<br>0 : non lié au médicament<br>1 : lié au médicament<br>2 : ne sais pas |
|-----------------------------------------------------------------------|---------------------|----------------------------------------|--------------------------------------------------|--------------------------|------------|-----------------------------------------------------------------------------------------------------------------------------------------------------------------------|---------------------------------------------------------------------------------------------|
|                                                                       |                     |                                        | du  _ _ _ _ _ _ _ _ <br>au  _ _ _ _ _ _ _ _      | <input type="checkbox"/> |            |                                                                                                                                                                       |                                                                                             |
|                                                                       |                     |                                        | du  _ _ _ _ _ _ _ _ <br>au  _ _ _ _ _ _ _ _      | <input type="checkbox"/> |            |                                                                                                                                                                       |                                                                                             |

(1) Voie d'administration : VO=voie orale ; IM=Intramusculaire ; IV=intraveineuse ; SC=sous-cutanée ou autre (à préciser) (2) En cours au moment de la survenue de l'EIG

**7. Evènement indésirable grave [EIG]**

|                                                                                                                                                                     |                                                                                                                                                                                                            |                                                                                                                                 |
|---------------------------------------------------------------------------------------------------------------------------------------------------------------------|------------------------------------------------------------------------------------------------------------------------------------------------------------------------------------------------------------|---------------------------------------------------------------------------------------------------------------------------------|
| <b>Diagnostic :</b> <input type="checkbox"/> Définitif <input type="checkbox"/> Provisoire<br>.....<br>.....<br>.....                                               |                                                                                                                                                                                                            | <b>Organe(s) concerné(s) :</b><br>.....<br>.....<br>.....                                                                       |
| <b>Date de survenue des premiers symptômes :</b>  _ _ _ _ _ _2_ _0_ _ _ <br>Préciser lesquels :<br>.....                                                            |                                                                                                                                                                                                            | <b>Critères de gravité :</b><br><input type="checkbox"/> Nécessite ou prolonge l'hospitalisation :<br>du  _ _ _ _ _ _2_ _0_ _ _ |
| <b>Date d'apparition de l'EIG :</b><br> _ _ _ _ _ _2_ _0_ _ _ <br>jj mm aaaa<br>Heure de survenue :  _ _  hh  _ _  min<br><input type="checkbox"/> donnée manquante | <b>Délai</b> entre la date de la dernière administration du ME/produit assimilé ou la date de procédure/acte ajouté par la recherche et la date de survenue de l'EIG :<br> _ _  /  _ _ _ _ _ <br>jj hh min |                                                                                                                                 |

**L'évènement a-t-il conduit à :**

- aucune mesure prise concernant le ME
- diminution de la posologie du ME     augmentation de la posologie du ME
- arrêt définitif du ME
- arrêt transitoire du ME, date de reprise : |\_|\_| |\_|\_| |\_|\_2\_|\_0\_|\_|\_|\_|
- ne sais pas

Récidive de l'EIG après ré-administration :  Non  Oui Date : |\_|\_| |\_|\_| |\_|\_2\_|\_0\_|\_|\_|\_|

Non applicable

**Des mesures symptomatiques ont-elles été prises ?**

Non     Oui Date : |\_|\_| |\_|\_| |\_|\_2\_|\_0\_|\_|\_|\_| Préciser : .....

**L'évènement a-t-il conduit à une levée d'insu ?**

Non     Oui Date : |\_|\_| |\_|\_| |\_|\_2\_|\_0\_|\_|\_|\_|     Non applicable

**L'évènement fait-il suite à :**

- une erreur médicamenteuse ?     Non     Oui Date : |\_|\_| |\_|\_| |\_|\_2\_|\_0\_|\_|\_|\_|
- un surdosage ?     Non     Oui Date : |\_|\_| |\_|\_| |\_|\_2\_|\_0\_|\_|\_|\_|
- un mésusage ?     Non     Oui Date : |\_|\_| |\_|\_| |\_|\_2\_|\_0\_|\_|\_|\_|
- autre (préciser) : .....     Non     Oui Date : |\_|\_| |\_|\_| |\_|\_2\_|\_0\_|\_|\_|\_|

au |\_|\_| |\_|\_| |\_|\_2\_|\_0\_|\_|\_|\_|  en cours

- Décès
- Mise en jeu du pronostic vital
- Incapacité ou handicap important ou durable
- Anomalie ou malformation congénitale
- Autre(s) critère(s) médicalement significatif(s), préciser :  
.....  
.....

**Degré de sévérité**

:  
 Léger     Modéré     Sévère

**COVIDICUS** Erreur ! Source du renvoi introuvable.

Référence de la personne se prêtant à la recherche : |\_|\_|\_| - |\_|\_|\_|\_| - |\_| - |\_|  
n°centre - n° ordre de sélection - initiale - initiale

nom prénom

| Evolution de l'événement                                                                                                                        |                                                                                                   |                                                                                                                                                                                 |
|-------------------------------------------------------------------------------------------------------------------------------------------------|---------------------------------------------------------------------------------------------------|---------------------------------------------------------------------------------------------------------------------------------------------------------------------------------|
| <input type="checkbox"/> <b>Décès</b><br><input type="radio"/> sans relation avec l'EIG<br><input type="radio"/> en relation avec l'EIG         | Date :  _ _ _ _ _2_ _0_ _ _ _ <br><small>jj mm aaaa</small>                                       | <input type="checkbox"/> <b>Sujet non encore rétabli</b> , préciser :<br><input type="radio"/> Etat stable <input type="radio"/> Amélioration <input type="radio"/> Aggravation |
| <input type="checkbox"/> <b>Résolu :</b><br><input type="radio"/> sans séquelles<br><input type="radio"/> avec séquelles, préciser lesquelles : | Date :  _ _ _ _ _2_ _0_ _ _ _ <br><small>jj mm aaaa</small><br> _ _ _ _ <br><small>hh min</small> | <input type="checkbox"/> <b>Evolution inconnue</b>                                                                                                                              |

| 8. Autre(s) étiologie(s) envisagée(s)                                                                |
|------------------------------------------------------------------------------------------------------|
| <input type="checkbox"/> Non <input type="checkbox"/> Oui Si oui, préciser : .....<br>.....<br>..... |

| 9. Examen(s) complémentaire(s) réalisé(s)                                                                                                                     |
|---------------------------------------------------------------------------------------------------------------------------------------------------------------|
| <input type="checkbox"/> Non <input type="checkbox"/> Oui Si oui, préciser date, nature et résultats : [joindre les bilans anonymisés].....<br>.....<br>..... |

| 10. Selon l'investigateur, l'événement indésirable grave est (plusieurs cases possibles)                                                                                                                                                                                                                                                                                                                                                                                                                                                                                                                                                                                                                                                                                                                                                                                                                                                                                                                                                                                                                                                                                                                                                                                                                                                                                                                                                                                                                                                                                                                                                                          |
|-------------------------------------------------------------------------------------------------------------------------------------------------------------------------------------------------------------------------------------------------------------------------------------------------------------------------------------------------------------------------------------------------------------------------------------------------------------------------------------------------------------------------------------------------------------------------------------------------------------------------------------------------------------------------------------------------------------------------------------------------------------------------------------------------------------------------------------------------------------------------------------------------------------------------------------------------------------------------------------------------------------------------------------------------------------------------------------------------------------------------------------------------------------------------------------------------------------------------------------------------------------------------------------------------------------------------------------------------------------------------------------------------------------------------------------------------------------------------------------------------------------------------------------------------------------------------------------------------------------------------------------------------------------------|
| <b>Lié à la recherche :</b><br><br><input type="checkbox"/> <b>Oui :</b> <input type="checkbox"/> au(x) médicament(s)/produit(s) assimilé(s) de la recherche : le(s)quel(s) ?<br><b>Lequel : ...DEXAMETHASONE / PLACEBO</b> <input type="checkbox"/> Relation certaine <input type="checkbox"/> Relation probable <input type="checkbox"/> Relation possible <input type="checkbox"/> Relation improbable (non exclue)<br><br><input type="checkbox"/> à la (aux) procédure(s)/acte(s) de la recherche : la/le(s)quel(les) ?<br><b>La/lequel(le) : .....HFNO.....</b> <input type="checkbox"/> Relation certaine <input type="checkbox"/> Relation probable <input type="checkbox"/> Relation possible <input type="checkbox"/> Relation improbable (non exclue)<br><b>La/lequel(le) : .....CPAP.....</b> <input type="checkbox"/> Relation certaine <input type="checkbox"/> Relation probable <input type="checkbox"/> Relation possible <input type="checkbox"/> Relation improbable (non exclue)<br><b>La/lequel(le) : Oxygénation conventionnelle.</b> <input type="checkbox"/> Relation certaine <input type="checkbox"/> Relation probable <input type="checkbox"/> Relation possible <input type="checkbox"/> Relation improbable (non exclue)<br><br><input type="checkbox"/> <b>Non :</b> <input type="checkbox"/> à la progression de la maladie faisant l'objet de la recherche : Infection à COVID-19<br><input type="checkbox"/> à un (ou plusieurs) médicament(s) concomitant(s) administré(s), le(s)quel(s) : .....<br><input type="checkbox"/> à une maladie intercurrente, laquelle : .....<br><input type="checkbox"/> autre, préciser : ..... |

| Notificateur                   | Investigateur      | Tampon du service : |
|--------------------------------|--------------------|---------------------|
| Nom et fonction :<br>Signature | Nom :<br>Signature |                     |

## 18.2 Pregnancy notification form

|                                                                                   |                                                                                                                             |                                                                                                     |
|-----------------------------------------------------------------------------------|-----------------------------------------------------------------------------------------------------------------------------|-----------------------------------------------------------------------------------------------------|
| Direction de l'Organisation Médicale et des relations avec les Universités (DOMU) |                                            | <b>PARTIE RESERVEE AU PROMOTEUR</b><br><br>REFERENCE INTERNE :<br><br>Référence GED : REC-DTYP-0185 |
| Délégation à la Recherche Clinique et à l'Innovation (DRCI)                       | <b>Notification et suivi d'une grossesse apparue au cours d'une recherche portant sur un Médicament ou produit assimilé</b> |                                                                                                     |

Ce formulaire doit être dûment complété (2 pages), signé et retourné sans délai au secteur Vigilance de la DRCI par télécopie au +33 (0)1 44 84 17 99

|                                                                                                                                                                                                                                                                         |                                                                                                |                                                                                                                                                      |                                                |                    |
|-------------------------------------------------------------------------------------------------------------------------------------------------------------------------------------------------------------------------------------------------------------------------|------------------------------------------------------------------------------------------------|------------------------------------------------------------------------------------------------------------------------------------------------------|------------------------------------------------|--------------------|
| <b>1. Identification de la recherche</b>                                                                                                                                                                                                                                |                                                                                                | Notification initiale <input type="checkbox"/>                                                                                                       | Suivi de notification <input type="checkbox"/> | N° du suivi  __ __ |
| Acronyme : COVIDICUS                                                                                                                                                                                                                                                    |                                                                                                | Date de notification :  _ _ _ _ _ _2_ _0_ _ _ _ <br>jj mm aaaa                                                                                       |                                                |                    |
|  <b>Recherche prioritaire sur COVID-19</b><br>Code de la recherche : APHP 200388                                                                                                       |                                                                                                | Date de prise de connaissance de la grossesse  _ _ _ _ _ _2_ _0_ _ _ _ <br>jj mm aaaa                                                                |                                                |                    |
|                                                                                                                                                                                                                                                                         |                                                                                                | l'investigateur :                                                                                                                                    |                                                |                    |
| Titre complet de la Recherche :                                                                                                                                                                                                                                         |                                                                                                |                                                                                                                                                      |                                                |                    |
| <b>“Dexamethasone and oxygen support strategies in ICU patients with Covid-19 pneumonia”</b>                                                                                                                                                                            |                                                                                                |                                                                                                                                                      |                                                |                    |
| <b>2. Identification du centre investigateur</b>                                                                                                                                                                                                                        |                                                                                                |                                                                                                                                                      |                                                |                    |
| Nom de l'établissement : .....                                                                                                                                                                                                                                          |                                                                                                | Investigateur (nom/prénom) : .....                                                                                                                   |                                                |                    |
| Ville et code postal : .....                                                                                                                                                                                                                                            |                                                                                                | Tél : .....                                                                                                                                          |                                                | Fax : .....        |
| Service : .....                                                                                                                                                                                                                                                         |                                                                                                |                                                                                                                                                      |                                                |                    |
| <b>3. Identification de la personne présentant une grossesse</b>                                                                                                                                                                                                        |                                                                                                |                                                                                                                                                      |                                                |                    |
| Référence de la personne :  _ _ _ _  -  _ _ _ _  -  _  -  _ <br><small>n°centre - n° ordre de sélection - initiale - initiale<br/>nom prénom</small>                                                                                                                    |                                                                                                | <b>Cas particulier d'une exposition paternelle :</b> <input type="checkbox"/> Oui <input type="checkbox"/> Non                                       |                                                |                    |
| Date de naissance :  _ _ _ _ _ _ _ _ _ _                                                                                                                                                                                                                                |                                                                                                | Référence de la personne :  _ _ _ _  -  _ _ _ _  -  _  -  _ <br><small>n°centre - n° ordre de sélection - initiale - initiale<br/>nom prénom</small> |                                                |                    |
| Date d'inclusion :  _ _ _ _ _ _ _2_ _0_ _ _ _                                                                                                                                                                                                                           |                                                                                                | Date de naissance :  _ _ _ _ _ _ _ _ _ _                                                                                                             |                                                |                    |
| Date de randomisation :  _ _ _ _ _ _ _2_ _0_ _ _ _                                                                                                                                                                                                                      |                                                                                                | Date d'inclusion :  _ _ _ _ _ _ _2_ _0_ _ _ _                                                                                                        |                                                |                    |
| Groupe de randomisation :                                                                                                                                                                                                                                               |                                                                                                | Date de randomisation :  _ _ _ _ _ _ _2_ _0_ _ _ _                                                                                                   |                                                |                    |
| Pour les patients déjà ventilés :                                                                                                                                                                                                                                       |                                                                                                | Groupe de randomisation :                                                                                                                            |                                                |                    |
| <input type="checkbox"/> Groupe DXM <input type="checkbox"/> Groupe Placebo                                                                                                                                                                                             |                                                                                                | Pour les patients déjà ventilés :                                                                                                                    |                                                |                    |
| Pour les patients non-ventilés :                                                                                                                                                                                                                                        |                                                                                                | <input type="checkbox"/> Groupe DXM <input type="checkbox"/> Groupe Placebo                                                                          |                                                |                    |
| <input type="checkbox"/> Groupe DXM-O2 <input type="checkbox"/> Groupe DXM-CPAP <input type="checkbox"/> Groupe DXM-HFNO                                                                                                                                                |                                                                                                | Pour les patients non-ventilés :                                                                                                                     |                                                |                    |
| <input type="checkbox"/> Groupe Placebo-O2 <input type="checkbox"/> Groupe Placebo -CPAP <input type="checkbox"/> Groupe Placebo -HFNO                                                                                                                                  |                                                                                                | <input type="checkbox"/> Groupe DXM-O2 <input type="checkbox"/> Groupe DXM-CPAP <input type="checkbox"/> Groupe DXM-HFNO                             |                                                |                    |
| Date des dernières règles :  _ _ _ _ _ _ _2_ _0_ _ _ _                                                                                                                                                                                                                  |                                                                                                | <input type="checkbox"/> Groupe Placebo-O2 <input type="checkbox"/> Groupe Placebo -CPAP <input type="checkbox"/> Groupe Placebo -HFNO               |                                                |                    |
| Et/ou date début de grossesse :  _ _ _ _ _ _ _2_ _0_ _ _ _                                                                                                                                                                                                              |                                                                                                |                                                                                                                                                      |                                                |                    |
| <b>Expositions au cours de la grossesse :</b>                                                                                                                                                                                                                           |                                                                                                |                                                                                                                                                      |                                                |                    |
| Tabac :                                                                                                                                                                                                                                                                 | <input type="checkbox"/> non <input type="checkbox"/> Oui (préciser nombre de paquets/année) : | <input type="checkbox"/> arrêt (préciser date) :                                                                                                     | <input type="checkbox"/> poursuite             |                    |
| Alcool :                                                                                                                                                                                                                                                                | <input type="checkbox"/> non <input type="checkbox"/> oui (préciser unités OH) :               | <input type="checkbox"/> arrêt (préciser date) :                                                                                                     | <input type="checkbox"/> poursuite             |                    |
| Drogue :                                                                                                                                                                                                                                                                | <input type="checkbox"/> non <input type="checkbox"/> oui (préciser substance) :               | <input type="checkbox"/> arrêt (préciser date) :                                                                                                     | <input type="checkbox"/> poursuite             |                    |
| Autre (préciser) :                                                                                                                                                                                                                                                      |                                                                                                |                                                                                                                                                      |                                                |                    |
| <b>4. Antécédents maternels</b>                                                                                                                                                                                                                                         |                                                                                                |                                                                                                                                                      |                                                |                    |
| <b>Médicaux :</b>                                                                                                                                                                                                                                                       |                                                                                                | <b>Chirurgicaux :</b>                                                                                                                                |                                                |                    |
| <b>Obstétricaux :</b>  _ _ _ _  geste  _ _ _ _  pare                                                                                                                                                                                                                    |                                                                                                |                                                                                                                                                      |                                                |                    |
| Préciser si fausse couche, grossesse extra-utérine, interruption de grossesse (médicale ou volontaire), mort <i>in utero</i> , malformation congénitale, pathologie congénitale/néonatale non malformative, ... ( <i>nombre, date et nature/raison si applicable</i> ). |                                                                                                |                                                                                                                                                      |                                                |                    |
| <b>5. Médicament(s) expérimental (aux) administré(s) ou non pendant la grossesse ou s'il s'agit une exposition paternelle</b>                                                                                                                                           |                                                                                                |                                                                                                                                                      |                                                |                    |
| Nom commercial (de préférence)                                                                                                                                                                                                                                          | Date de première administration                                                                | Date de dernière administration                                                                                                                      | Voie                                           | Posologie / 24h    |



| ou Dénomination Commune Internationale         | Ou non administré                                                         | Ou en cours                                                         | d'administration <sup>(1)</sup> |                |
|------------------------------------------------|---------------------------------------------------------------------------|---------------------------------------------------------------------|---------------------------------|----------------|
| Administration de la DEXAMETHASONE de J1 à J5  | _ _ _ _ _ _ _ _2_ _0_ _ _ _ _ <br><input type="checkbox"/> Non administré | _ _ _ _ _ _ _ _2_ _0_ _ _ _ _ <br><input type="checkbox"/> En cours | <b>IV</b>                       | <b>14 mg/j</b> |
| Administration de la DEXAMETHASONE de J6 à J10 | _ _ _ _ _ _ _ _2_ _0_ _ _ _ _ <br><input type="checkbox"/> Non administré | _ _ _ _ _ _ _ _2_ _0_ _ _ _ _ <br><input type="checkbox"/> En cours | <b>IV</b>                       | <b>4 mg/j</b>  |
| Administration du Placebo : NaCl 0,9%          | _ _ _ _ _ _ _ _2_ _0_ _ _ _ _ <br><input type="checkbox"/> Non administré | _ _ _ _ _ _ _ _2_ _0_ _ _ _ _ <br><input type="checkbox"/> En cours | <b>IV</b>                       |                |

(1) Voie d'administration : VO=voie orale ; IM=Intramusculaire ; IV=intraveineuse ; SC=sous-cutanée ou autre (à préciser)

| 6. Procédures et actes ajoutés par la recherche (Barrez l'encadré si procédures et actes non réalisés) | Date de réalisation (jj/mm/aaaa) | Chronologie        |                          |
|--------------------------------------------------------------------------------------------------------|----------------------------------|--------------------|--------------------------|
|                                                                                                        |                                  | Avant la grossesse | Au cours de la grossesse |
| Mise en place du système d'oxygénation : HFNO, CPAP, Oxygénation conventionnelle                       | _ _ _ _ _ _ _ _2_ _0_ _ _ _ _    |                    |                          |

Acronyme : Erreur ! Source du renvoi introuvable. Erreur ! Source du renvoi introuvable. COVIDICUS

Référence de la personne : |\_|\_|\_|\_| - |\_|\_|\_|\_|\_| - |\_| - |\_|  
n°centre - n° ordre de sélection - initiale - initiale  
nom prénom

**PARTIE RESERVEE AU PROMOTEUR**

**REFERENCE INTERNE :**

REC-DTVP-0185

**7. Médicament(s) concomitants administré(s) dans le cadre du soin**  
(Cf. annexe « Liste relative aux médicaments concomitants » complétée :  Oui  Non applicable)

| Nom commercial (de préférence) ou Dénomination Commune Internationale | Date de première administration                                     | Date de dernière administration Ou en cours                         | Voie d'administration <sup>(1)</sup> | Posologie / 24h |
|-----------------------------------------------------------------------|---------------------------------------------------------------------|---------------------------------------------------------------------|--------------------------------------|-----------------|
|                                                                       | _ _ _ _ _ _ _ _2_ _0_ _ _ _ _ <br><input type="checkbox"/> En cours | _ _ _ _ _ _ _ _2_ _0_ _ _ _ _ <br><input type="checkbox"/> En cours |                                      |                 |
|                                                                       | _ _ _ _ _ _ _ _2_ _0_ _ _ _ _ <br><input type="checkbox"/> En cours | _ _ _ _ _ _ _ _2_ _0_ _ _ _ _ <br><input type="checkbox"/> En cours |                                      |                 |
|                                                                       | _ _ _ _ _ _ _ _2_ _0_ _ _ _ _ <br><input type="checkbox"/> En cours | _ _ _ _ _ _ _ _2_ _0_ _ _ _ _ <br><input type="checkbox"/> En cours |                                      |                 |

(1) Voie d'administration : VO=voie orale ; IM=Intramusculaire ; IV=intraveineuse ; SC=sous-cutanée ou autre (à préciser)

**8. Suivi de la grossesse**

Echographiques. Date(s) et résultats à préciser (joindre les CR anonymisés) :

Autres examens. Date(s) et résultats à préciser (joindre les CR anonymisés) :

**9. Grossesse en cours**  (faxer un nouveau formulaire complété à l'issue de la grossesse pour le suivi de la notification initiale)  
**ou issue de la grossesse**  (compléter ci-dessous)

Date : |\_|\_|\_|\_|\_|\_|\_|\_|\_2\_|\_0\_|\_|\_|\_|\_| Terme : |\_|\_| SA |\_|\_| J

Fausse couche  
→ Examen anatomo-pathologique disponible :  Non  Oui, précisez le résultat :

Grossesse extra-utérine  
→ Examen anatomo-pathologique disponible :  Non  Oui, précisez le résultat :

Interruption de grossesse → Raison :  
→ Examen anatomo-pathologique disponible :  Non  Oui, précisez le résultat :

Accouchement :  Spontané  Provoqué  Voie basse  Césarienne

Naissance multiple :  Non  Oui, précisez le nombre :

Souffrance fœtale :  Non  Oui, précisez :

Mort-né :  Non  Oui, précisez :

Placenta normal :  Oui  Non, précisez :

Liquide amniotique :  Clair  Autre, précisez :

|                                                                                                                                                                                      |                       |                                  |
|--------------------------------------------------------------------------------------------------------------------------------------------------------------------------------------|-----------------------|----------------------------------|
| Anesthésie : <input type="checkbox"/> Générale <input type="checkbox"/> Péridurale <input type="checkbox"/> Rachianesthésie <input type="checkbox"/> Aucune                          |                       |                                  |
| <b>10. Nouveau-né (Si naissance multiple, compléter les parties 1, 2, 3, 9 et 10 d'un nouveau formulaire et le faxer)</b>                                                            |                       |                                  |
| Sexe : <input type="checkbox"/> Masculin <input type="checkbox"/> Féminin                                                                                                            |                       |                                  |
| Poids :  _ _ _ _  grammes                                                                                                                                                            | Taille :  _ _ _ _  cm | Périmètre crânien :  _ _ _ _  cm |
| APGAR : 1 minute : _____ 5 minutes : _____ 10 minutes : _____                                                                                                                        |                       |                                  |
| Malformation(s) congénitale(s) : <input type="checkbox"/> Non <input type="checkbox"/> Oui, précisez :                                                                               |                       |                                  |
| Pathologie(s) congénitale(s)/néonatale(s) non malformative(s) : <input type="checkbox"/> Non <input type="checkbox"/> Oui, précisez :                                                |                       |                                  |
| Le nouveau-né a-t-il bénéficié d'un suivi particulier à la naissance : <input type="checkbox"/> Non <input type="checkbox"/> Oui, précisez : <input type="checkbox"/> Non applicable |                       |                                  |
| <b>Notificateur</b>                                                                                                                                                                  | <b>Investigateur</b>  | <b>Tampon du service :</b>       |
| Nom et fonction :<br>Signature :                                                                                                                                                     | Nom :<br>Signature :  |                                  |

### 18.3 SmPC or Investigator's Brochure

Refer to the SmPC for the Dexamethasone should be consulted:

<http://document-rcp.vidal.fr/2c/48fb7289565b43f5a03d5377dfd13d2c.pdf>

### 18.4 EQ-5D-5L questionnaire

## EQ-5D-5L Questionnaire sur la santé Version française pour la France (French version for France)

Pour chaque rubrique, veuillez cocher UNE case, celle qui décrit le mieux votre santé AUJOURD'HUI.

#### MOBILITÉ

- Je n'ai aucun problème pour me déplacer à pied
- J'ai des problèmes légers pour me déplacer à pied
- J'ai des problèmes modérés pour me déplacer à pied
- J'ai des problèmes sévères pour me déplacer à pied
- Je suis incapable de me déplacer à pied

#### AUTONOMIE DE LA PERSONNE

- Je n'ai aucun problème pour me laver ou m'habiller tout(e) seul(e)
- J'ai des problèmes légers pour me laver ou m'habiller tout(e) seul(e)
- J'ai des problèmes modérés pour me laver ou m'habiller tout(e) seul(e)
- J'ai des problèmes sévères pour me laver ou m'habiller tout(e) seul(e)
- Je suis incapable de me laver ou de m'habiller tout(e) seul(e)

#### ACTIVITES COURANTES (*exemples: travail, études, travaux domestiques, activités familiales ou loisirs*)

- Je n'ai aucun problème pour accomplir mes activités courantes
- J'ai des problèmes légers pour accomplir mes activités courantes
- J'ai des problèmes modérés pour accomplir mes activités courantes
- J'ai des problèmes sévères pour accomplir mes activités courantes
- Je suis incapable d'accomplir mes activités courantes

#### DOULEURS / GÊNE

- Je n'ai ni douleur ni gêne
- J'ai des douleurs ou une gêne légère(s)
- J'ai des douleurs ou une gêne modérée(s)
- J'ai des douleurs ou une gêne sévère(s)

J'ai des douleurs ou une gêne extrême(s)

### **ANXIÉTÉ / DÉPRESSION**

Je ne suis ni anxieux(se), ni déprimé(e)

Je suis légèrement anxieux(se) ou déprimé(e)

Je suis modérément anxieux(se) ou déprimé(e)

Je suis sévèrement anxieux(se) ou déprimé(e)

Je suis extrêmement anxieux(se) ou déprimé(e)

### 18.5 MRC Score

#### Score neuromusculaire MRC (*Medical Research Council*)

| Fonctions évaluées<br>(6 à droite et 6 à gauche) | Score attribué à chaque groupe musculaire              |
|--------------------------------------------------|--------------------------------------------------------|
| Abduction du bras                                | 0 = absence de contraction visible                     |
| Flexion de l'avant-bras                          | 1 = contraction visible sans mouvement du membre       |
| Extension du poignet                             | 2 = mouvement insuffisant pour vaincre la pesanteur    |
| Flexion de cuisse                                | 3 = mouvement permettant de vaincre la pesanteur       |
| Extension de la jambe                            | 4 = mouvement contre la pesanteur et contre résistance |
| Flexion dorsale du pied                          | 5 = force musculaire normale                           |

Chaque membre est coté de 0 à 15. Le score total va de 0 (tétraplégie complète) à 60 (force musculaire normale).

1

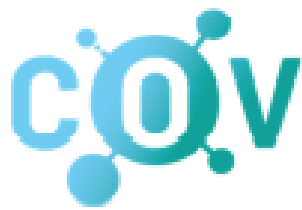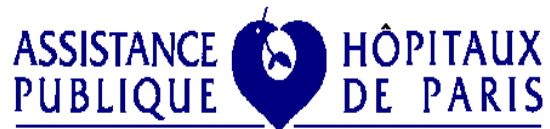

2

3

4

5

6

## Statistical Analysis Plan

|                          |                                                                                     |
|--------------------------|-------------------------------------------------------------------------------------|
| TRIAL FULL TITLE         | Dexamethasone and oxygen support strategies in ICU patients with Covid-19 pneumonia |
| EUDRACT NUMBER           | 2020-001457-43                                                                      |
| SAP VERSION              | 1                                                                                   |
| ISRCTN NUMBER            |                                                                                     |
| SAP VERSION DATE         | August, 2021                                                                        |
| TRIAL STATISTICIAN       | Pr Sylvie Chevret                                                                   |
| TRIAL CHIEF INVESTIGATOR | Pr Jean-François TIMSIT                                                             |
| SAP AUTHOR               | Pr Sylvie Chevret                                                                   |

7

8

9

10

11

12

13

14

15 **SAP Signatures**

16

17 **Chief Investigator**

18 Name:

19 Signature: \_\_\_\_\_

20

21 Date: \_\_\_\_\_

22 **Statistician**

23 Name: Chevret

24 Signature: \_\_\_\_\_  \_\_\_\_\_

25

26 Date: August, 2021

27

28

29

30

|    |                                                                                   |    |
|----|-----------------------------------------------------------------------------------|----|
| 31 | <b>Table of Contents</b>                                                          |    |
| 32 | SAP Signatures .....                                                              | 2  |
| 33 | 1 Abbreviations and Definitions.....                                              | 5  |
| 34 | 2 Introduction .....                                                              | 6  |
| 35 | 2.1 Summary.....                                                                  | 6  |
| 36 | 2.2 Purpose of the analyses.....                                                  | 6  |
| 37 | 3 Study Objectives and Endpoints.....                                             | 6  |
| 38 | 3.1 Study Objectives.....                                                         | 6  |
| 39 | 3.1.1 Primary objective .....                                                     | 6  |
| 40 | 3.1.2 Secondary objectives .....                                                  | 6  |
| 41 | 3.2 Endpoints.....                                                                | 7  |
| 42 | 3.2.1 Primary endpoint .....                                                      | 7  |
| 43 | 3.2.2 Secondary endpoints .....                                                   | 7  |
| 44 | 4 Study Methods .....                                                             | 8  |
| 45 | 4.1 General Study Design and Plan .....                                           | 8  |
| 46 | 4.2 Inclusion–Exclusion Criteria and General Study Population.....                | 10 |
| 47 | 4.2.1 Inclusion criteria.....                                                     | 10 |
| 48 | 4.2.2 Exclusion criteria .....                                                    | 10 |
| 49 | 4.3 Randomisation and Blinding .....                                              | 11 |
| 50 | 4.4 Study Variables.....                                                          | 11 |
| 51 | 5 Sample Size.....                                                                | 13 |
| 52 | 5.1 Effect of high–dose dexamethasone .....                                       | 13 |
| 53 | 5.2 In the population of non–severe non–mechanically–ventilated Covid–19 infected |    |
| 54 | patients .....                                                                    | 13 |
| 55 | 6 General Considerations .....                                                    | 13 |
| 56 | 6.1 Timing of Analyses .....                                                      | 13 |
| 57 | 6.2 Analysis Populations.....                                                     | 14 |
| 58 | 6.2.1 Full Analysis Population .....                                              | 14 |
| 59 | 6.2.2 As Treated Population.....                                                  | 14 |
| 60 | 6.2.3 Safety Population .....                                                     | 14 |
| 61 | 6.3 Covariates and Subgroups .....                                                | 14 |
| 62 | 6.4 Missing Data .....                                                            | 14 |
| 63 | 6.5 Interim Analyses and Data Monitoring .....                                    | 14 |
| 64 | 6.5.1 Purpose of Interim Analyses.....                                            | 14 |
| 65 | 6.5.2 Planned Schedule of Interim Analyses .....                                  | 15 |
| 66 | 6.5.3 Scope of Adaptations .....                                                  | 15 |
| 67 | 6.5.4 Stopping Rules .....                                                        | 15 |
| 68 | 6.5.5 Analysis Methods to Minimise Bias.....                                      | 16 |
| 69 | 6.5.6 Adjustment of Confidence Intervals and p–values .....                       | 16 |
| 70 | 6.5.7 Practical Measures to Minimise Bias .....                                   | 16 |
| 71 | 6.5.8 Documentation of Interim Analyses .....                                     | 18 |
| 72 | 6.6 Multi–centre Studies .....                                                    | 18 |
| 73 | 6.7 Multiple Testing .....                                                        | 18 |
| 74 | 7 Summary of Study Data .....                                                     | 18 |
| 75 | 7.1 Subject Disposition.....                                                      | 18 |



|    |     |                                                   |    |
|----|-----|---------------------------------------------------|----|
| 76 | 1.1 | Enrollment .....                                  | 18 |
| 77 | 1.2 | Allocation.....                                   | 18 |
| 78 | 1.3 | Follow-Up .....                                   | 18 |
| 79 | 1.4 | Analysis .....                                    | 18 |
| 80 | 7.2 | Protocol Deviations.....                          | 19 |
| 81 | 7.3 | Demographic and Baseline Variables.....           | 19 |
| 82 | 7.4 | Concurrent Illnesses and Medical Conditions ..... | 19 |
| 83 | 8   | Efficacy Analyses .....                           | 19 |
| 84 | 8.1 | Primary Efficacy Analysis .....                   | 19 |
| 85 | 8.2 | Secondary Efficacy Analyses .....                 | 20 |
| 86 | 9   | Safety Analyses .....                             | 21 |
| 87 | 9.1 | Adverse Events .....                              | 21 |
| 88 | 9.2 | Clinical Laboratory Evaluations .....             | 21 |
| 89 | 10  | Figures .....                                     | 21 |
| 90 | 11  | Reporting Conventions.....                        | 21 |
| 91 | 12  | Technical Details.....                            | 22 |
| 92 | 13  | Summary of Changes to the Protocol.....           | 22 |
| 93 | 14  | References .....                                  | 22 |
| 94 |     |                                                   |    |
| 95 |     |                                                   |    |

96 **1 Abbreviations and Definitions**

97 The list of the abbreviations and acronyms used in the Statistical Analysis Plan (SAP)  
 98 with definitions is reported below. All terms appear in alphabetical order.

99

|                  |                                         |
|------------------|-----------------------------------------|
| AE               | Adverse Event                           |
| AHRF             | Acute hypoxemic respiratory failure     |
| ARDS             | Acute respiratory distress syndrome     |
| CER              | comparative effectiveness research      |
| CPAP             | Continuous Positive Airway Pressure     |
| CRF              | Case Report Form                        |
| DNR              | Do not resuscitate orders               |
| DXM              | Dexamethasone                           |
| FiO <sub>2</sub> | Inspired oxygen fraction                |
| HFNO             | High-Flow Nasal Oxygen                  |
| ICU              | Intensive Care Unit                     |
| IQR              | Inter Quartile Range                    |
| IMP              | Investigational Medical Product         |
| MCMC             | Markov chain Monte Carlo                |
| MV               | Mechanical ventilation                  |
| NIV              | Non Invasive ventilation                |
| paO <sub>2</sub> | Partial oxygen pressure                 |
| SAP              | Statistical Analysis Plan               |
| SoC              | Standard of Care                        |
| SOFA             | Sepsis-related Organ Failure Assessment |
| SpO <sub>2</sub> | Oxygen saturation of hemoglobin         |
| URC              | Unit of Clinical Research               |
| VAP              | ventilation-acquired pneumonia          |

100

101

## 102 2 Introduction

### 103 2.1 Summary

104 The main manifestation of COVID-19 is acute hypoxemic respiratory failure (AHRF). In  
105 patients with AHRF, the need for invasive mechanical ventilation (MV) is associated with  
106 high mortality. The place of steroids is of paramount importance in patients suffering  
107 from viral pneumonia related to COVID-19. The lung damage at this phase could be  
108 related to immunopathological lesions, resulting from an overexuberant pro-  
109 inflammatory host response, rather than uncontrolled viral replication, as suggested by  
110 the description of Huang and al., suggesting that a cytokine proinflammatory storm was  
111 associated with disease severity.

112 Our hypotheses were that the use of High-Flow Nasal Oxygen (HFNO) or Continuous  
113 Positive Airway Pressure (CPAP) might reduce the need for mechanical ventilation and  
114 that steroids can reduce mortality of severe COVID-19 patients. We used  
115 dexamethasone as successfully used in acute respiratory distress syndrome (ARDS).

116 Two hypotheses were thus specifically tested in this study.

117 The first hypothesis was the benefit of high dose corticosteroid therapy on severe  
118 COVID-19 infection admitted in ICU in terms of survival.

119 The second hypothesis was that, in the subset of patients free of mechanical ventilation  
120 at admission, either CPAP or HFNO allows to reduce intubation rate safely during  
121 COVID-19 related acute hypoxemic respiratory failure.

122

### 123 2.2 Purpose of the analyses

124 The analyses will assess the efficacy and safety of high dose dexamethasone in  
125 comparison with the standard of care (scheduled to receive low dose of  
126 dexamethasone) and will be included in the clinical study report

127

## 128 3 Study Objectives and Endpoints

### 129 3.1 Study Objectives

#### 130 3.1.1 Primary objective

131 For the study of the effect of corticosteroids: To assess the impact of high-dose  
132 dexamethasone on overall mortality at day-60 after randomization in patients admitted  
133 in Intensive Care Unit (ICU) for severe COVID-19 infection.

134 For the study of the effect of oxygen support modality: To assess whether oxygen  
135 support based on either HFNO or CPAP modality in COVID-19 related acute hypoxemic  
136 respiratory failure reduces the need for MV at day-28.

#### 137 3.1.2 Secondary objectives

138 For the study of the effect of high-dose corticosteroids, secondary objectives included:

- 139 1. To compare the evolution of the viral load in the respiratory tract
- 140 2. To compare the occurrence of healthcare-associated infections
- 141 3. To compare the exposition to mechanical ventilation
- 142 4. To compare the evolution of SOFA score
- 143 5. To compare the exposition to renal replacement therapy
- 144 6. To compare the lengths of ICU and hospital-stay

145 For the study of the effect of oxygen support modalities, secondary objectives were, to  
146 compare each of oxygen support group to the control group in terms of:

- 147 1. To compare the overall survival
- 148 2. To compare the exposition to mechanical ventilation
- 149 3. To compare occurrence of severe hypoxemia during tracheal intubation
- 150 4. To compare occurrence of cardiac arrest following tracheal intubation
- 151 5. To compare the occurrence of healthcare-associated infections
- 152 6. To compare the length of ICU and hospital-stay

153

## 154 **3.2 Endpoints**

### 155 **3.2.1 Primary endpoint**

156 For the study of the effect of high-dose corticosteroids, the primary endpoint is the  
157 time-to-death from all causes within the first 60 days after randomization.

158 For the study of the effect of oxygen support modalities, the primary endpoint is the  
159 time to need for MV, as defined by any of the 3 criteria for intubation defined below,  
160 within the first 28 days after randomization. The use of those criteria rather than actual  
161 mechanical ventilation was justified to decrease information bias due to (i) the open  
162 design, (ii) possibility of delayed MV due to logistic constrains, and (ii) do not  
163 resuscitate orders (DNR).

164

165 The **pre-specified criteria for intubation** have been used previously (3):

- 166 1) signs of persisting or worsening respiratory failure, defined by at least two of the  
167 following criteria: a respiratory rate above 35 cycles/min, lack of improvement of signs  
168 of respiratory-muscle fatigue, development of copious tracheal secretions, acidosis with  
169 a pH below 7.35, SpO<sub>2</sub> below 90% despite FiO<sub>2</sub> ≥80% for more than 5 min without  
170 technical dysfunction, or intolerance to non-invasive ventilation (NIV); or one of the  
171 following
- 172 2) hemodynamic instability defined by a systolic blood pressure below 90 mmHg, mean  
173 blood pressure below 65 mmHg or requirement for vasopressor,
- 174 3) deterioration of neurologic status with a Glasgow coma scale below 12 points.

175

### 176 **3.2.2 Secondary endpoints**

177 For the study of the effect of high-dose corticosteroids, secondary endpoints include:

- 178 1. Cycle threshold for SARS-CoV-2 PCR at baseline, day 7+/-1 and day 10+/-1 in  
179 samples of the same origin (preferably subglottic i.e. bronchoalveolar lavage or  
180 tracheal aspiration, otherwise nasopharyngeal swab)
- 181 2. Proportion of patients with at least one episode of any healthcare-associated  
182 infection between randomization and D28
- 183 3. Number of days alive without mechanical ventilation at day 28
- 184 4. Changes in SOFA score from day 1 to day 3, day 7, day 10, day 21, day 28 or  
185 discharge-day from ICU as appropriate
- 186 5. Number of days alive without renal replacement therapy at day 28
- 187 6. Lengths of ICU-stay and hospital-stay

188 For the study of the effect of oxygen support modality, secondary endpoints are:

- 189 1. Overall survival within 60 days after randomization
- 190 2. Number of days alive without invasive mechanical ventilation at day 28
- 191 3. Proportion of patients with severe hypoxemia, which is defined as an oxygen
- 192 saturation of less than 80% during the same interval during the interval between
- 193 induction and 2 minutes after tracheal intubation
- 194 4. Proportion of patients with cardiac arrest within 1 hour after intubation
- 195 5. Proportion of patients with at least one episode of any healthcare-associated
- 196 infection between randomization and day 28
- 197 6. Lengths of ICU-stay and hospital-stay

198

199 **4 Study Methods**

200 **4.1 General Study Design and Plan**

201 • **Study configuration and experimental design**

202 This is a multicentre randomized controlled trial stratified on the patient severity at  
 203 inclusion (Figure 1). All consecutive patients with COVID-19 infection admitted in ICU,  
 204 receiving the best standard of care including low-dose dexamethasone (see below) and  
 205 any therapy for the treatment of their COVID-19 infection (either as a compassionate  
 206 use or in the context of a clinical trial, i.e., remdesivir, lopinavir/ritonavir, favipiravir,  
 207 hydroxychloroquine and any other new drug with potential activity) and who met the  
 208 eligibility criteria could participate.

209

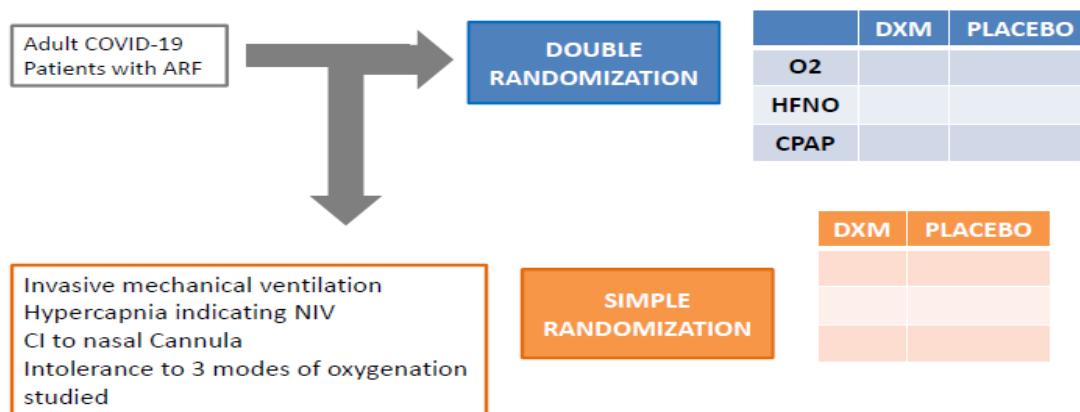

210

211 *Figure 1: Design of the protocol: Stratification of the randomization according to patient*  
 212 *severity; DXM: dexamethasone*

213

214 The design was stratified on patient severity;

215

- 216 - In patients without (i) invasive mechanical ventilation, (ii) anatomical factors
- 217 precluding the use of nasal cannula, (iii) hypercapnia indicating NIV (paCO<sub>2</sub> ≥ 50
- 218 mmHg) OR (iv) intolerance to one of the 3 modes one of oxygenation studied at
- 219 admission, a 2x2 factorial design was used to assess the two interventions,
- 220 separately.

221

222 This resulted in 6 treatment arms

223 1- Standard oxygen and placebo of high-dose dexamethasone

224 2- Standard oxygen, and high-dose dexamethasone

225 3- CPAP and placebo of high-dose dexamethasone

226 4- CPAP, and high-dose dexamethasone

227 5- HFNO and placebo of high-dose dexamethasone

228 6- HFNO and high-dose dexamethasone

229

230 - **In patients with (i) invasive mechanical ventilation, (ii) anatomical factors**  
231 **precluding the use of nasal cannula, (iii) hypercapnia indicating NIV (paCO<sub>2</sub> ≥ 50**  
232 **mmHg) OR (iv) intolerance to one of the 3 modes one of oxygenation studied at**  
233 **admission, only 2 randomized groups were constituted:**

234 1- Placebo of high-dose dexamethasone

235 2- high-dose dexamethasone

236

237 • **Type of control**

238 All patients received the best standard of care available at the time. Based on the Haut  
239 Conseil de Santé Publique (July, 23, 2020), dexamethasone was administered at a daily  
240 dosage of 6 mg for a maximum of 10 days, after evaluation of the individual  
241 benefit/risk ratio in patients under 70 years of age requiring oxygen and resuscitation.  
242 This resulted in a pragmatic trial comparing dexamethasone 6mg+14mg of vs  
243 dexamethasone 6mg + placebo. Thus, the trial focused on the effect of high-dose  
244 dexamethasone compared to low-dose.

245

246 • **Level and method of blinding**

247 The conception of a placebo was not possible due to the emergency to begin the trial  
248 for Dexamethasone, or due to the nature of intervention for the oxygen support  
249 modalities. Pre randomized boxes containing masked vials dexamethasone or normal  
250 saline were available in each centre. These precautions and the use of primary  
251 endpoints (mortality within day 60, or specific criteria for MV) minimized the risk of  
252 biases due to the open nature of the study.

253 Statistical analyses will be conducted blinded to treatment assignment, with treatment  
254 arms denoted by letters instead of explicit labelling; note that the control arm of  
255 oxygenation support will be identified for analysis purposes (given only comparison of  
256 each intervention to that control arm is to be performed).

257 All investigators were unaware of aggregate outcomes during the study.

258

259 • **Method of treatment assignment**

260 Randomized clinical trial (see below, section 4.3.) A centralized 24/24, password-  
261 protected Internet service (CleanWeb® solution) expressly designed for the study and  
262 developed under the responsibility of the URC Paris Nord, was used. Information was  
263 recorded in the electronic system in order to prevent the investigator and medical team  
264 from predicting the group allocated to patients. To include and randomize a patient in

265 the study, investigators accessed the website using an individual password, and filled  
 266 out a short medical record form. After each randomization, a treatment number was  
 267 allocated to the patient and a confirmation email of randomization sent automatically to  
 268 the investigator concerned and the URC Paris Nord.

269

270 • **At what point in time subjects are randomised relative to treatments**

271 After signing the informed consent (or according to the emergency inclusion), and  
 272 checking the eligibility criteria, including the severity strata, patients were randomized  
 273 across the arms.

274

275 • **Sequence and duration of all study periods**

276 The maximal duration of participation of each patient will be 60 days.

|                                                        |                     |
|--------------------------------------------------------|---------------------|
| Duration of enrolment period                           | 12 months           |
| The length of participation for participants, of which | 75 days             |
| - Maximum period between selection and inclusion       | none                |
| - Treatment period                                     | 10 days             |
| - Follow up period                                     | 60 days +/- 2 weeks |
| Total study duration                                   | 14 ,5months         |

277

278 **4.2 Inclusion–Exclusion Criteria and General Study Population**

279 **4.2.1 Inclusion criteria**

- 280 1. Age  $\geq$  18 years
- 281 2. Admitted to ICU within 48 hours
- 282 3. Confirmed or highly suspected COVID–19 infection
- 283 4. Acute hypoxemic respiratory failure (PaO<sub>2</sub> <70 mmHg or SpO<sub>2</sub> <90% on room air  
 284 or tachypnea >30/min or labored breathing or respiratory distress; need for  
 285 oxygen flow  $\geq$  6L/min)
- 286 5. Any treatment intended to treat the SARS–CoV–2 infection if accessible, in the  
 287 absence of contraindications (either as a compassionate use or in the context of  
 288 a clinical trial, i.e remdesivir, lopinavir/ritonavir, favipiravir, oseltamivir,  
 289 hydroxychloroquine and any other new drug with potential activity).

290 **4.2.2 Exclusion criteria**

- 291 1. Moribund status
- 292 2. Pregnancy or breastfeeding
- 293 3. Long term corticotherapy at a dose of 0.5mg/kg/j or higher
- 294 4. Active and untreated bacterial, fungal or parasitic infection
- 295 5. Not written informed consent from the patient or a legal representative if  
 296 appropriate. If absence a legal representative the patient may be included in  
 297 emergency procedure
- 298 6. Hypersensitivity to dexamethasone or to any of the excipients
- 299 7. Not Affiliation to the French social security

300

**301 4.3 Randomisation and Blinding**

302 Randomization was balanced (1:1:1 in non-MV patients, 1:1 in MV patients),  
303 centralized, and stratified on centre.

304 Computer-generated randomization lists were generated, using permutation blocks of  
305 varying sizes that were kept confidential to the investigators. The randomization lists  
306 were generated by a statistician from Saint Louis hospital. All these points insured the  
307 allocation concealment of the randomization process.

308

**309 4.4 Study Variables**

310



| Actions                                                                                                                                                      | Baseline visit                                             | Visit 2  | Visit 3  | Visit 4 | Visit 5 | Visit 6 | Visit 7   | Visit at ICU discharge / hospital discharge | End of research |
|--------------------------------------------------------------------------------------------------------------------------------------------------------------|------------------------------------------------------------|----------|----------|---------|---------|---------|-----------|---------------------------------------------|-----------------|
|                                                                                                                                                              | D1 +/- 1                                                   | D3 +/- 1 | D7 +/- 1 | D10+/-1 | D14+/-1 | D21+/-2 | D28 +/- 2 |                                             | D60 +/-2wks     |
| <b>Clinical Data</b>                                                                                                                                         |                                                            |          |          |         |         |         |           |                                             |                 |
| Inclusion and non-inclusion criteria                                                                                                                         | ▲                                                          |          |          |         |         |         |           |                                             |                 |
| Informed consent                                                                                                                                             | ▲                                                          |          |          |         |         |         |           |                                             |                 |
| Informed consent pursuit if necessary                                                                                                                        | ▲                                                          | ▲        | ▲        | ▲       | ▲       | ▲       | ▲         |                                             |                 |
| Demographics & Medical History                                                                                                                               | X                                                          |          |          |         |         |         |           |                                             |                 |
| Complete physical exam, including vital parameters, vital status                                                                                             | <b>Continuously</b>                                        |          |          |         |         |         |           |                                             |                 |
| SOFA Score                                                                                                                                                   | ▲                                                          | ▲        | ▲        | ▲       | ▲       | ▲       | ▲         | ▲                                           |                 |
| Consultation at hospital or Phone questionnaire (EQ-5D-5L questionnaire)                                                                                     |                                                            |          |          |         |         |         |           |                                             | ▲               |
| Adverse events                                                                                                                                               | <b>Continuously</b>                                        |          |          |         |         |         |           |                                             |                 |
| <b>Randomisation : R1</b>                                                                                                                                    |                                                            |          |          |         |         |         |           |                                             |                 |
| <b>Treatment :</b><br>- Experimental group E1: Dexamethasone treatment –<br>- Control group C1: placebo of dexamethasone                                     | ▲                                                          | ▲        | ▲        | ▲       |         |         |           |                                             |                 |
| <b>Randomisation : R2</b>                                                                                                                                    |                                                            |          |          |         |         |         |           |                                             |                 |
| <b>Treatment :</b><br>- Experimental group E2A: HFNO<br>- Experimental group E2B : CPAP<br>- Control group C2: standard oxygen therapy                       | ▲                                                          | ▲        | ▲        | ▲       | ▲       | ▲       | ▲         |                                             |                 |
| <b>Radiological Data</b>                                                                                                                                     |                                                            |          |          |         |         |         |           |                                             |                 |
| Chest X Ray                                                                                                                                                  | <b>At least every 48h during ICU stay, and forHospital</b> |          |          |         |         |         |           |                                             |                 |
| <b>Biological Data</b>                                                                                                                                       |                                                            |          |          |         |         |         |           |                                             |                 |
| Blood β-HCG test for women of child-bearing age                                                                                                              | X                                                          |          |          |         |         |         |           |                                             |                 |
| Standard biology                                                                                                                                             | X                                                          | X        | X        | X       | X       | X       | X         | X                                           |                 |
| SARS-CoV-2 PCR (preferably subglottic sample i.e. bronchoalveolar lavage plugged telescopic catheter, or tracheal aspiration, otherwise nasopharyngeal swab) | X                                                          |          | X        |         |         |         |           |                                             |                 |
| Blood sampling for Bio collection                                                                                                                            | ▲                                                          | ▲        | ▲        |         | ▲       |         | ▲         | ▲                                           |                 |
| Environment air collection                                                                                                                                   | ▲                                                          |          |          |         |         |         |           |                                             |                 |

▲ : realized for the research

X: realized as part of the care

311  
312

## 313 5 Sample Size

314 Computation of sample sizes has been done for each intervention, independently.  
315 Based on those computation, it was computed that the trial needs to recruit 550  
316 subjects including 330 patients who were not mechanically-ventilated at inclusion.

317

### 318 5.1 Effect of high-dose dexamethasone

319 According to the literature, the reported cumulative incidence of death at Day-60 was  
320 about 60%. A two-sided log-rank test with an overall sample size of 550 subjects (275  
321 in each group) achieves 80.1% power at a 0.050 significance level to detect a hazard  
322 ratio of 0.75 when the proportion surviving in the control group is 0.40 (that is, the  
323 survival rate in the Dexamethasone group is expected to be 0.50). The study lasts for  
324 150 days of which subject accrual (entry) occurs in the first 90 days. The accrual pattern  
325 across time periods is uniform (all periods equal). No subjects drop out of the control  
326 group. No subjects drop out of the treatment group. No patient is assumed to switch  
327 from the control group to the other group.

328

### 329 5.2 In the population of non-severe non-mechanically-ventilated Covid-19 infected 330 patients

331 Based on data from the literature, the cumulative incidence of intubation at day 28 is  
332 estimated to be 80% in the standard of care group. Computation was done for each of  
333 the two comparisons, using an adjusted type I error rate of 0.025 given the multiple  
334 comparisons (i.e., Bonferonni adjustments of the nominal significance level). A two-  
335 sided log-rank test with an overall sample size of 220 subjects (110 in the control  
336 group and 233 in the treatment group) achieves 80.0% power at a 0.025 significance  
337 level to detect a hazard ratio of 0.65 when the proportion surviving in the control group  
338 is 0.20 (that is, a 28-day cumulative incidence of need for VM of 80% in the control arm  
339 versus 65% in the experimental arm). The study lasts for 120 days of which subject  
340 accrual (entry) occurs in the first 60 days. The accrual pattern across time periods is  
341 uniform (all periods equal). No subjects drop out of the control group. No subjects drop  
342 out of the treatment group. No switches are expected.

343 Therefore, a total of 110 patients in each of the 3 arms will be required, that is a total  
344 of 330 non-MV patients at randomization to be included in the trial.

345

## 346 6 General Considerations

### 347 6.1 Timing of Analyses

- 348 • Interim monitoring for success will begin after 50 patients have been enrolled  
349 and will be repeated after every additional 50 patients are enrolled
- 350 • The final analysis will be performed 60 days after the inclusion of the last patient  
351 unless the data monitoring is not closed
- 352 • The final analysis will be performed on data transferred from CleanWeb®, having  
353 been documented as meeting the cleaning and approval requirements of SOP  
354 and after the finalisation and approval of this SAP document.

355

## 356 **6.2 Analysis Populations**

357

### 358 **6.2.1 Full Analysis Population**

359 All primary analyses will follow the Intention-to-treat method. All randomized patients  
360 will be analyzed in their allocated group, irrespective of intervention eventually received  
361 or lost to follow-up. Deviations from the protocol will be registered as well as the  
362 reasons for deviation.

### 363 **6.2.2 As Treated Population**

364 Estimation of administered corticosteroid effect will use the as-treated population,  
365 where each patient will be considered in the group (either 0, 6, or 20, mg) of  
366 administered dexamethasone.

### 367 **6.2.3 Safety Population**

368 Safety population was defined as the intention-to-treat population, whatever the  
369 treatment actually received.

370

## 371 **6.3 Covariates and Subgroups**

372 Randomization was stratified on centre, but it will be omitted in the analysis because it  
373 introduces too many categories.

374 Analysis will be stratified on patient stratum (either mechanically ventilated or not).

375 No a priori hypothesis of subgroup differences was assumed. Therefore, all subgroup  
376 analyses are post-hoc and exploratory.

377 Subgroup analyses should focus on the evidence for a difference in treatment effects:  
378 the interaction effect, using subgroup-specific summary statistics displayed on a forest  
379 plot.

380

## 381 **6.4 Missing Data**

382 Missing data for the primary endpoint (vital status or ventilation mode), and other  
383 endpoints related to the ICU stay are not expected. Indeed, the complete follow up of  
384 each enrolled patient is assured by the study's design since the observation period is  
385 defined from day 1 (randomization) until day 28, ICU discharge, or death, whichever  
386 occurs first. For the other endpoints, missing data will be handled by multiple  
387 imputation techniques

388 Missing data will be described on the overall population and by treatment group, and  
389 method of handling them according to their frequencies and nature will be used.  
390 Sensitivity analysis will confirm reliability of conclusions upon various hypotheses on  
391 missing values.

392

## 393 **6.5 Interim Analyses and Data Monitoring**

### 394 **6.5.1 Purpose of Interim Analyses**

395 For ethical reasons, clinical trial data will be analyzed repeatedly at any time prior to the  
396 formal completion of the trial, as recommended for decades (Jennison 1990), with  
397 results presented to the data monitoring committee of the trial. Moreover, when  
398 comparing multiple commercially available and perhaps U.S. Food and Drug

399 Administration (FDA)– or European Medicines Agency (EMA)–approved products or  
 400 treatment strategies against one another via comparative effectiveness research (CER)  
 401 trial, Bayesian analyses appear particularly well suited (Connor 2013; Gasponer 2014;  
 402 Ryan 2019). Indeed, Bayesian approaches to the monitoring of group sequential designs  
 403 have two main advantages compared with classical group sequential designs (Berry  
 404 2004; Spiegelhalter 1994): first, they facilitate the implementation of interim success  
 405 and futility criteria that are tailored to the subsequent decision making based on  
 406 explicit probabilistic statements (that may offer strong benefit for their ability to  
 407 calculate the probability that each treatment is the best or worst) (Jacob 2016), and  
 408 second, they allow inclusion of prior information on the treatment differences and on  
 409 the control group, actualized over the trial.

410

### 411 6.5.2 Planned Schedule of Interim Analyses

412 Interim monitoring for success will begin after 50 patients have been enrolled and will  
 413 be repeated after every additional 50 patients are enrolled. Interim analyses will be  
 414 stratified on the patient base line severity group, based on the primary outcome  
 415 measure and main secondary endpoints of each stratum:

- 416 – Severe group: survival time, SOFA score
- 417 – Moderate group: time to MV criterion, survival

418

### 419 6.5.3 Scope of Adaptations

420 The analyses will therefore rely on computing the posterior distribution of the hazard  
 421 ratio (main endpoints) or between the experimental and control arms for time-to-event  
 422 co-primary outcomes and the posterior distributions of event rates in each arm for  
 423 binary co-primary outcomes. From the latter, the posterior distribution of the difference  
 424 in event rate will be derived. These posterior distributions will be graphically displayed,  
 425 and summarized by their medians and 95% credibility intervals (the Bayesian  
 426 counterparts of confidence intervals). Noninformative priors will be used, that is the  
 427 prior distribution for the log hazard ratio will be a Gaussian distribution with mean 0  
 428 and variance  $10^6$ . Following Harrel and Lindsay, posterior probabilities will be  
 429 reported as follows (<https://hbiostat.org/proj/covid19/bayesplan.html>)

|                             |                                         |
|-----------------------------|-----------------------------------------|
| P1=P(HR < 1   data)         | Any benefit                             |
| P2=P(HR < 0.75   data)      | High-dose DXM benefit                   |
| P3=P(HR < 0.65   data)      | Oxygen support benefit                  |
| P4=P(HR > 1.05   data)      | More than trivial harm                  |
| P5=P(0.8 < HR < 1.2   data) | Similarity between oxygenation supports |

430

### 431 6.5.4 Stopping Rules

432 For this study, action triggers will be:

- 433 • Stop with evidence for efficacy if  $P1 > 0.95$
- 434 • Stop with evidence for moderate or greater efficacy if  $P2$  or  $P3 > 0.8$

- 435 • Stop with evidence for inefficacy if  $P_4 > 0.8$
- 436 • Stop with evidence for harm if  $P_5 > 0.75$

437 Last, once at least 100 patients have been enrolled, and thereafter after every additional  
438 50 patients, we will also assess the presence of any period-by-treatment interaction, by  
439 estimating the ratio of the estimated effect in both periods, in a Bayesian setting (Millen  
440 2014). Posterior probabilities of such a ratio will be estimated using Markov chain  
441 Monte Carlo (MCMC) methods.

442 The DSMB could be asked to recommend early termination based on results of the  
443 safety/efficacy interim analyses.

444

#### 445 **6.5.5 Analysis Methods to Minimise Bias**

446 The most effective design technique for avoiding selection bias and allowing causal  
447 inference is randomization, centrally performed to ensure allocation concealment.  
448 Moreover, to ensure such concealment, the size of the permutation blocks used in the  
449 generation of lists was varying.

450 To ensure the absence of attrition bias, the primary analysis will be made according to  
451 the intention-to-treat principle.

452 To ensure non-informative right censoring, a reference date for the analysis that  
453 achieved so-called administrative censoring will be used for the analysis of time-to-  
454 failure data for all outcomes that could not be fixed like 60-day mortality.

455 To avoid inflating the type I error rate, baseline characteristics (at randomization) of the  
456 randomized groups will be compared roughly, without formal statistical testing (Pocock  
457 2002).

458

#### 459 **6.5.6 Adjustment of Confidence Intervals and p-values**

460 Final level of statistical significance is of 0.05.

461

#### 462 **6.5.7 Practical Measures to Minimise Bias**

463 Interim analyses were performed by the statistician blindly to the allocation groups that  
464 were displayed by letters (A, B, C, etc).

465 Reporting of interim analyses had to only be sent to the members of the DSMB.

466 S Chevret will perform any interim analysis

467 Members of the DSMB will see any data or analyses at the interim and make decisions

468 No information will be publically available following an interim analysis except that  
469 communicated by the members of the DSMB

470 No interim information will be provided to the sponsor and investigators

471 No one will be unblinded at any point in the trial unless the members of the DSMB  
472 asked for

473 S Chevret will perform any final analyses and remain blinded until decision of  
474 unblindness for the final report by the members of the DSMB.

475

476

477

478



480 **6.5.8 Documentation of Interim Analyses**

481 Snapshots of the data at each interim analysis were preserved, as all documentation of  
 482 analysis plans, programming code and reporting provided at each interim.

483  
 484 **6.6 Multi-centre Studies**

485 Post-hoc test for qualitative or quantitative treatment-by-centre interactions were  
 486 performed on the primary outcomes based on Gail and Simon’s statistics (1985).

487  
 488 **6.7 Multiple Testing**

489 In non-mechanically ventilated patients, Bonferroni adjustments of the nominal  
 490 significance level, was considered in the sample size computation.

491  
 492 **7 Summary of Study Data**

493 All continuous variables will be summarized using the following descriptive statistics: n  
 494 (non-missing sample size), median, interquartile range (IQR). The frequency and  
 495 percentages (based on the non-missing sample size) of observed levels will be reported  
 496 for all categorical measures. In general, all data will be listed, sorted by treatment. All  
 497 summary tables will be structured with a column for each treatment in the order  
 498 (Control, Experimental) and will be annotated with the total population size relevant to  
 499 that table/treatment, including any missing observations.

500  
 501 **7.1 Subject Disposition**

502 A skeleton CONSORT diagram will be provided as follows.

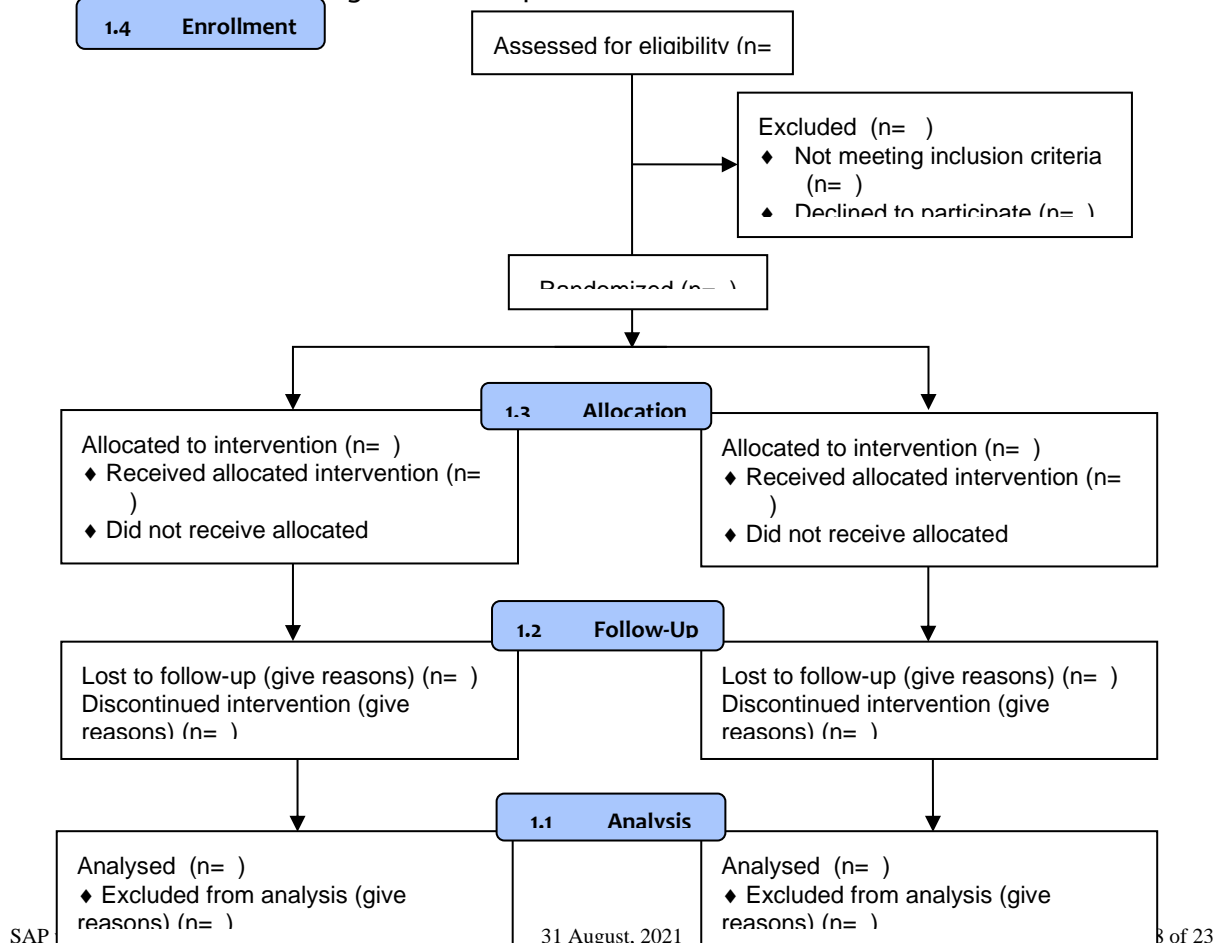

## 506 7.2 Protocol Deviations

507 No protocol deviation will be considered in the analysis.

508

## 509 7.3 Demographic and Baseline Variables

510 Age, Sex, weight, body mass index (BMI), segregated into normal (BMI, ), overweight

511 (xx–xx), moderate obese (xx–xx) and severe obese (>xx), were summarized,

512 Patient status at inclusion was recorded, including body temperature (°Celsius),

513 consciousness, neurological deficit, and use of vasopressors and ventilation support.

514 Blood gazes as well as respiratory rate were also summarized, together with the SOFA

515 score and sub-scores.

516 Viral data, including PCR and type of samples, were also reported as well as biological

517 data (blood cells counts, glycemia, creatinine, prothrombin time, CP, D-Dimers, ferritin,

518 PCT and troponin).

519

## 520 7.4 Concurrent Illnesses and Medical Conditions

521 Comorbidities were described, namely diabetes, high blood pressure, cardiac failure,

522 chronic obstructive pulmonary disease, tobacco use, asthma, renal failure, cirrhosis,

523 neurological failure, malignancy, hemopathy, transplantation, auto-immunity.

524 Prior and Concurrent Medications including base line COVID-19 treatments, were

525 summarized.

526

## 527 8 Efficacy Analyses

528 Data will be summarized by treatment group. N, Median, and hazard ratios (HR) with 95

529 percent confidence intervals will summarize right-censored efficacy variables, whereas

530 number and percent will summarize binary or categorical efficacy variables. All analyses

531 of the continuous efficacy variables (e.g., number of days free of mechanical ventilation)

532 will be performed based on nonparametric Wilcoxon rank sum test. Treatment groups

533 will be tested at the 2-sided 5% significance level.

534 Right-censored endpoints will be summarized by survival functions estimated from the

535 Kaplan-Meier estimator, while treatment effect based on hazard ratio (Cox, 1972). In

536 case of competing risks, estimation of cumulative incidence will be reported in each

537 randomized group, then compared by the Gray test (1988).

538 All assumptions for Cox regression models will be assessed. All analyses of categorical

539 efficacy measures will be performed using logistic regression with treatment group and

540 adjustments for study center.

541

### 542 8.1 Primary Efficacy Analysis

543 The primary endpoints of the study are time-to-failure endpoints, that will be analyzed

544 using survival methods assuming noninformative right-censoring of the data; this is

545 obviously true for the cumulative incidence of all deaths, whatever the cause, used in

546 the evaluation of corticosteroids; this is also assumed to be true in non-mechanically

547 ventilated patients, due to the fact that no death prior to criteria for MV will be

548 expected. In both cases, no lost to follow up that could be related to the disease will be



549 expected within the first 28 or 60 days after study enrollment. Thus, only administrative  
550 censoring at the time of analysis (see below interim analyses) or at day 28 or day 60 (for  
551 patients still alive free of failure at that time) will be expected.

552 Under such assumptions, survival curves will be estimated in each randomization arm  
553 according to the Kaplan–Meier method, then compared by the Log–Rank test. Cox  
554 models stratified on the patient severity at inclusion (MV or not) will quantify the effect  
555 size by hazard ratio with 95% confidence intervals. Subset by treatment interactions will  
556 be tested by the Gail and Simon (1985) interaction statistics.

557

558 Beside the ITT analyses, analysis of the corticosteroids effect, will use an instrumental  
559 variable (IV) method in the “as–treated population (Sommer 1991). The IV approach will  
560 be used to assess the magnitude of the as–received treatment effect in contrast to the  
561 ITT approach, which focuses on the as–assigned treatment effect, whatever the  
562 administered treatment. The use of two models under the IV approach, one relating  
563 treatment received to outcome (the AT model), and the other relating randomized  
564 intervention assignment to the treatment received, has led many researchers to refer to  
565 the IV method as a two–stage estimation procedure. The most common IV in medicine  
566 is randomization within a randomized controlled trial that has treatment contamination  
567 (Sussman 2010): IV analysis can bridge the gap between the more policy focused  
568 question posed by intention to treat analyses and the patient focused question of  
569 biological efficacy.

570 This is particularly well–suited to our setting, where “contamination” refers to the  
571 administration of dexamethasone, possibly considering the dose actually administered.

572 Note that the use of predictive covariates in the model relating the randomized  
573 intervention to treatment received will increase the precision of the predicted treatment  
574 probability that replaces observed treatment received in the IV model for the outcome.  
575 Including predictors of outcome in the model for outcome of course reduces the  
576 residual error.

577

## 578 **8.2 Secondary Efficacy Analyses**

579 In accordance to the secondary criteria for Dexamethasone versus standard of care,

- 580 1. The evolution of the viral load in the respiratory tract will modelled and  
581 compared by linear mixed models.
- 582 2. The proportions of healthcare–associated infection at day–28 and day–60 will be  
583 compared between groups by an exact Fisher test.
- 584 3. The number of days alive without mechanical ventilation will be compared  
585 between groups by a Wilcoxon rank sum test.
- 586 4. The evolution of SOFA–score will modelled and compared by linear mixed  
587 models.
- 588 5. The number of days alive without renal replacement therapy will be compared  
589 between groups by a Wilcoxon rank sum test.
- 590 6. The length of ICU and hospital–stay will be compared between groups by a  
591 Wilcoxon rank sum test.

592

593 Secondary analyses comparing (i) HFNO and standard oxygen therapy and (ii) CPAP and  
594 standard oxygen therapy

595 1. The number of days alive without mechanical ventilation will be compared by a  
596 Wilcoxon rank sum test.

597 2. The proportion of healthcare-associated infection at day-28 and day-60 will be  
598 compared by an exact Fisher test.

599 3. The length of ICU and hospital-stay will be compared by a Wilcoxon rank sum  
600 test

601

## 602 **9 Safety Analyses**

603 All safety analyses will be based on the intention-to-treat population.

604 Complications, namely ventilation-acquired pneumonia (VAP) was estimated through  
605 cumulative incidence function, taking into account death free of VAP as competing-  
606 risks outcomes. We similarly estimated the cumulative incidence of bacteremia, and  
607 neuropathy.

608

### 609 **9.1 Adverse Events**

610 The proportion of patients who experience at least one serious adverse event will be  
611 analyzed as a categorical variable (with patients classified as either having experienced  
612 at least one serious adverse event, or not) using a  $\chi$ -squared or Fisher's exact test (as  
613 appropriate). If appropriate, a more complex model of serious adverse event  
614 occurrences will be constructed utilizing adverse events as count variables. Possible  
615 models for this analysis include Poisson regression and negative binomial regression.  
616 An analysis of subgroups of serious adverse events will be performed separately, but in  
617 an identical manner to the overall adverse events analyses.

618

### 619 **9.2 Clinical Laboratory Evaluations**

620 Laboratory tests will be summarized using spaghetti plots, that is, scatter plot of the  
621 baseline value on the horizontal axis versus the subsequent values, as considered  
622 above, with different plotting symbols used to distinguish different treatment groups.

623

## 624 **10 Figures**

625 Where possible, all figures and tables relating to a given outcome should be grouped  
626 together.

627

## 628 **11 Reporting Conventions**

629 P-values  $\geq 0.001$  will be reported to 3 decimal places unless  $\geq 0.01$  when reported with  
630 2 decimal places instead; p-values less than 0.0001 will be reported as " $<0.0001$ ".

631 The mean, standard deviation, and any other statistics other than quantiles, will be  
632 reported to one decimal place greater than the original data. Quantiles, such as median,  
633 or minimum and maximum will use the same number of decimal places as the original  
634 data.

635 Estimated parameters, not on the same scale as raw observations (e.g., regression  
636 coefficients) will be reported to 4 significant figures.

## 637 **12 Technical Details**

638 All reports will report software package or packages used, including the version number  
639 of the software; the operating system of the computer (e.g. Macintosh, Windows etc.).

640 The population to be used in a table or figure will be explicitly set at the start of a block  
641 of code that computes the output, ideally by looking up the population from the table  
642 of tables

643 Any outputs will have

- 644 • The date and time included
- 645 • The name of the code file that produced the analysis

646 At the start of any code file there will be a set of comments that give

- 647 • the date and time of writing
- 648 • references to inputs and outputs
- 649 • reference to any parent code file that runs the child code file

650

## 651 **13 Summary of Changes to the Protocol**

652 If the statistical analysis plan proposes changes to the statistical approach described in  
653 the protocol then summarize those changes in this section. Analyses are usually faithful  
654 to those specified in the protocol, but occasionally different, or supplemental, analyses  
655 are needed. Explain the reason for such changes. You may choose to identify those  
656 analyses that are not from the protocol in the relevant sections above. However,  
657 documenting the changes here greatly aids clarity.

658 Other important, non–statistical changes to the protocol should also be noted in this  
659 section, for example the introduction of an additional treatment group.

660

## 661 **14 References**

- 662 • Berry SM, Berry DA. Accounting for Multiplicities in Assessing Drug Safety: A  
663 Three–Level Hierarchical Mixture Model. *Biometrics*. 2004;60(2):418-26.
- 664 • Connor JT, Elm JJ, Broglio KR. Bayesian adaptive trials offer advantages in  
665 comparative effectiveness trials: an example in status epilepticus. *J Clin*  
666 *Epidemiol*. 2013;66(8):S130-7.
- 667 • Cox DR. Regression models and life–tables (with discussion). *J R Stat Soc Ser B*  
668 1972;34:187–220.
- 669 • Gail M, Simon R. Testing for qualitative interactions between treatment effects  
670 and  
671 • patient subsets. *Biometrics* 1985;41:361–72.
- 672 • Gasponer T, Gerber F, Bornkamp B, Ohlssen D, Vandemeulebroecke M, Schmidli  
673 H. A practical guide to Bayesian group sequential designs. *Pharm Stat*. janv  
674 2014;13(1):71-80.
- 675 • Gray RJ. A class of k–sample tests for comparing the cumulative incidence of a  
676 competing risk. *Ann Stat* 1988;16:1141–54.

- 677
- 678
- 679
- 680
- 681
- 682
- 683
- 684
- 685
- 686
- 687
- 688
- 689
- 690
- 691
- 692
- 693
- 694
- 695
- 696
- 697
- 698
- Jacob L, Uvarova M, Boulet S, Begaj I, Chevret S. Evaluation of a multi-arm multi-stage Bayesian design for phase II drug selection trials – an example in hemato-oncology. *BMC Med Res Methodol.* 2016;16(1).
  - Jennison C, Turnbull BW. Statistical Approaches to Interim Monitoring of Medical Trials: A Review and Commentary. *Stat Sci.* août 1990;5(3):299-317.
  - Millen BA, Dmitrienko A, Song G. Bayesian assessment of the influence and interaction conditions in multipopulation tailoring clinical trials. *J Biopharm Stat.* 2014;24(1):94–109.
  - Sommer A, Zeger S. On estimating efficacy from clinical trials. *Statistics in Medicine* 1991;10:45– 52. [PubMed: 2006355]
  - Pocock SJ, Assmann SE, Enos LE, Kastan LE. Subgroup analysis, covariate adjustment and baseline comparisons in clinical trial reporting: Current practice and problems. *Statistics in Medicine* 2002;21:2197–2930.
  - Ryan EG, Bruce J, Metcalfe AJ, Stallard N, Lamb SE, Viele K, et al. Using Bayesian adaptive designs to improve phase III trials: a respiratory care example. *BMC Med Res Methodol* [Internet]. déc 2019 [cité 1 avr 2020];19(1). Disponible sur: <https://bmcmedresmethodol.biomedcentral.com/articles/10.1186/s12874-019-0739-3>
  - Spiegelhalter DJ, Freedman LS, Parmar MKB. Bayesian Approaches to Randomized Trials. *J R Stat Soc Ser A Stat Soc.* 1994;157(3):357.
  - Sussman JB. An IV for the RCT: using instrumental variables to adjust for treatment contamination in randomised controlled trials. *BMJ.* 2010; 340: c2073.

# CPP Ile de France XI

## Comité de Protection des Personnes

---

St-Germain-en-Laye, le 11 novembre 2020

**APHP**  
**Mme Fadila AMERALI**  
**Carré Historique de l'Hôpital Saint-Louis**  
**Secteur Gris - Porte 23**  
**1 avenue Claude Vellefaux**  
**75475 PARIS**

|                           |                                                                                                                             |
|---------------------------|-----------------------------------------------------------------------------------------------------------------------------|
| <b>Titre de l'essai :</b> | <b>Dexamethasone et stratégies d'oxygénation des patients hospitalisés en réanimation atteints de pneumonies à Covid-19</b> |
| <b>Promoteur :</b>        | <b>APHP</b>                                                                                                                 |
| <b>Investigateur :</b>    | <b>Pr Jean-François TIMSIT</b>                                                                                              |
| <b>Réf. Promoteur :</b>   | <b>APHP 200388-COVIDICUS</b>                                                                                                |
| <b>N° IDRCB :</b>         | <b>2020-001457-43</b>                                                                                                       |
| <b>Réf. CPP :</b>         | <b>20037-25957</b>                                                                                                          |

|                                                                                                                                                                 |          |
|-----------------------------------------------------------------------------------------------------------------------------------------------------------------|----------|
| <b>Demande d'avis valant autorisation sur une recherche de catégorie 1</b>                                                                                      | <b>X</b> |
| Demande d'avis valant autorisation sur une recherche de catégorie 2                                                                                             |          |
| Demande d'avis valant autorisation sur une recherche de catégorie 3                                                                                             |          |
| Demande d'avis consultatif sur un changement substantiel de finalité dans l'utilisation d'une collection d'éléments biologiques humains (art. L. 1211-2 du CSP) |          |
| Demande d'avis consultatif sur un projet de déclaration de constitution d'une collection d'échantillons biologiques humains (art. L. 1243-3 du CSP)             |          |

| <b>Modification Substantielle N°3</b> |                         |
|---------------------------------------|-------------------------|
| <b>Documents examinés</b>             |                         |
| <b>Numéro et date de version</b>      |                         |
| Courrier de demande d'avis            | 22/10/2020              |
| Tableau comparatif des modifications  | Joint                   |
| Protocole                             | Version 5 du 08/10/2020 |
| CV des nouveaux investigateurs        | Joint                   |
| La liste des investigateurs           | Version 4 du 22/10/2020 |

**Le CPP Ile de France XI a examiné dans sa séance du 5 NOVEMBRE 2020, la modification substantielle n°3 au projet de recherche référencé ci-dessus.**

Ont participé à la délibération :

**I – PREMIER COLLEGE**

Caty BITOUN  
Gérard LOEB  
Axel LEVIER  
Kolia MILOJEVIC  
Sabine de la PORTE

Médecin  
Médecin  
Ingénieur  
Biostatisticien  
Chercheur

---

**Sabine de la PORTE**, Présidente – **Léon LOISEAU**, Vice-président – **Michèle CATZ**, Secrétaire générale

**Kolia MILOJEVIC**, Vice-secrétaire Général

**Anne-Elisabeth DECARIS**, Assistante

Pavillon Jacques Courtois – 2<sup>ème</sup> étage, 20, rue Armagis 78105 Saint Germain en Laye Cedex

Tél : 01.39.27.42.58 - Fax : 01.39.27.49.01

E.mail : cpidf11.chips@ght-yvelinesnord.fr

# CPP Ile de France XI

## Comité de Protection des Personnes

|                  |                       |
|------------------|-----------------------|
| Réf. Promoteur : | APHP 200388-COVIDICUS |
| N° IDRCB :       | 2020-001457-43        |
| Réf. CPP :       | 20037-25957           |

Ariane QUEFFELEC  
Delphine REGNAULT

Médecin  
Biostatisticienne

### II - DEUXIEME COLLEGE

Michèle CATZ  
Christine GHESTEM  
Odile LACHAUD  
Jean-François LAIGNEAU  
Olivier LANTRES  
Léon LOISEAU  
Nicole TAVERNY

Psychologue  
Association des familles du Vésinet  
Représentant UDAF 78  
Avocat  
Avocat  
Philosophe  
Association des familles du Vésinet

*Aucun membre délibérant du comité n'est affecté par un conflit d'intérêt.*

### **Pour le 1<sup>er</sup> point de cette modification substantielle, le CPP a décidé d'un AVIS DEFAVORABLE**

#### **Cette modification substantielle porte sur le changement du critère d'inclusion.**

**Justification** : l'inclusion dans le protocole les personnes qui ne sont pas affiliées à un régime de sécurité sociale n'est pas acceptable au regard de la loi.

**Pour rappel** : Pour les RIPH 1°(ou 2°), la dérogation accordée par le CPP doit se fonder au moins sur l'une des conditions suivantes :

- 1°l'importance du bénéfice escompté pour les personnes est de nature à justifier le risque prévisible encouru ;
- 2°les recherches se justifient au regard du bénéfice escompté pour d'autres personnes se trouvant dans la même situation juridique. Dans ce cas, le risque prévisible et les contraintes que comporte la recherche doivent présenter un caractère minime.

Aucune des conditions n'est remplie. En particulier la double randomisation et la nature de l'essai ne permettent pas de garantir un bénéfice.

De plus, dans un avis daté du 2 novembre, le Haut Conseil de la Santé Publique (HCSP) détaille ses recommandations concernant les indications et modalités d'utilisation des corticoïdes chez les patients hospitalisés pour infection Covid-19. Ces recommandations sont de nature à faciliter l'accès au traitement de ces personnes.

#### **L'autre point reçoit un AVIS FAVORABLE : actualisation de la liste des investigateurs.**

L'attestation de BPC pour les docteurs GERI et DUPUIS a été reçue par mail le 4 11 2020.

**Sabine de la PORTE, Présidente de séance**



---

Sabine de la PORTE, Présidente – Léon LOISEAU, Vice-président – Michèle CATZ, Secrétaire générale  
Kolia MILOJEVIC, Vice-secrétaire Général  
Anne-Elisabeth DECARIS, Assistante  
Pavillon Jacques Courtois – 2<sup>ème</sup> étage, 20, rue Armagis 78105 Saint Germain en Laye Cedex  
Tél : 01.39.27.42.58 - Fax : 01.39.27.49.01  
E.mail : cppidf11.chips@ght-yvelinesnord.fr

**Date : 10.04.2020**

| Identifiants de l'essai clinique                                         |                                                                                                 |                                                 |                                   |
|--------------------------------------------------------------------------|-------------------------------------------------------------------------------------------------|-------------------------------------------------|-----------------------------------|
| Titre                                                                    | Dexamethasone and oxygen support strategies in ICU patients with Covid-19 pneumonia - COVIDICUS |                                                 |                                   |
| Promoteur                                                                | APHP                                                                                            |                                                 |                                   |
| Réf à rappeler                                                           | MEDAECNAT-2020-04-00007                                                                         | N° EudraCT                                      | <b>2020-001457-43</b>             |
| Expéditeur                                                               |                                                                                                 | Destinataire (demandeur : nom / société / tél.) |                                   |
| ANSM / Direction Produit INFHEP / Equipe Virologie –<br>Thérapie génique |                                                                                                 | Fadila Amerali<br>APHP<br>01 44 84 17 17        |                                   |
|                                                                          |                                                                                                 | Mél                                             | fadila.amerali@aphp.fr            |
| CPP destinataire                                                         | IDF11 - Ile-de-France XI                                                                        | Mél                                             | cppidf11@chi-poissy-st-germain.fr |

Vu le code de la santé publique et notamment l'article L. 1123-8, et les dispositions réglementaires prises pour son application, et vu le dossier de demande d'autorisation d'essai clinique adressé à l'Agence nationale de sécurité du médicament et des produits de santé (ANSM) ;

Vu les compléments versés par le promoteur en date du 09 avril 2020 et notamment le protocole de l'essai cité en objet modifié (version 1.2 datée du 09.04.20), suite à la demande de l'ANSM ;

**L'autorisation mentionnée à l'article L. 1123-8 du code de la santé publique est accordée pour l'essai clinique cité en objet.**

Dr Dominique MARTIN

Directeur général

Je vous demande de transmettre toute demande de modifications concernant ce dossier par courriel adressé à la boîte : [ams-essaiscliniques@ansm.sante.fr](mailto:ams-essaiscliniques@ansm.sante.fr) . Lors de l'envoi de ces dossiers, je vous demande de veiller à reporter dans l'objet du message la mention : **MSA/ N° EUDRACT** pour les MS soumises pour autorisation ou pour les dossiers mixtes (comportant des modifications soumises pour autorisation et d'autres pour information).

**Confidentialité**

Cette transmission est à l'attention exclusive du(des) destinataire(s) ci-dessus mentionné(s) et peut contenir des informations privilégiées et/ou confidentielles. Si vous n'êtes pas le destinataire voulu ou une personne mandatée pour lui remettre cette transmission, vous avez reçu ce document par erreur et toute utilisation, révélation, copie ou communication de son contenu est interdite. Si vous avez reçu cette transmission par erreur, veuillez nous en informer par téléphone immédiatement et nous retourner le message original par courrier. Merci.

**Confidentiality**

This transmission is intended to the addressee(s) listed above only and may contain preferential or/and confidential information. If you are not the intended recipient, you are hereby notified that you have received the document by mistake and any use, disclosure, copying or communication of the content of this transmission is prohibited. If you have received this transmission by mistake, please call us immediately and return the original message by mail. Thank you.

code : AEC\_FOR004 v03



**AUTORISATION DE MODIFICATION (S) SUBSTANTIELLE (S)  
D'ESSAI(S) CLINIQUE(S) DE MEDICAMENT A USAGE HUMAIN (MSA)**

Date : **17 SEP. 2020**

| Identifiants de la (des) modification(s) et du (des) essai(s) concerné(s) |                                                                                  |                                                          |
|---------------------------------------------------------------------------|----------------------------------------------------------------------------------|----------------------------------------------------------|
| Promoteur                                                                 | AP-HP Délégation à la Recherche Clinique et à l'Innovation (GIRCI Ile de France) |                                                          |
| Réf. Essai(s)                                                             | Réf. Modification(s)                                                             |                                                          |
| N° EudraCT                                                                | Réf à rappeler                                                                   | Réf. Promoteur (item E.1 du formulaire de demande d'AMS) |
| 2020-001457-43                                                            | MEDMSANAT-2020-07-00121                                                          | APHP 200388 / MS n°2/ Protocole V3 du 09/07/2020         |

| Expéditeur                      | Destinataire (demandeur : nom / société / tél.)                                                                      |
|---------------------------------|----------------------------------------------------------------------------------------------------------------------|
| ANSM / Direction Produit CARDIO | Fadila Amerali<br>AP-HP Délégation à la Recherche Clinique et à l'Innovation (GIRCI Ile de France)<br>01 44 84 17 17 |
|                                 | Mél : fadila.amerali@aphp.fr                                                                                         |

Vu le code de la santé publique et notamment l'article L. 1123-9, et les dispositions réglementaires prises pour son application, et vu la ou les autorisations d'essais cliniques délivrées par l'Agence nationale de sécurité du médicament et des produits de santé (ANSM) pour le ou les essais cliniques ci-dessus référencés ;

Vu le dossier de demande d'autorisation de modification(s) substantielle(s) adressé à l'ANSM ;

Vu les compléments versés par le promoteur en date des 13 août, 09 et 10 septembre 2020 et notamment le protocole modifié (protocole version 4 du 07/09/2020) de l'essai cité en objet, suite à la demande de l'ANSM ;

**L'autorisation mentionnée à l'article L. 1123-9 du code de la santé publique est accordée pour la (les) modification(s) substantielle(s) identifiée ci-dessus, pour les aspects relevant de la compétence de l'ANSM.**

  
Dr Christèle RATIGNIER-CARBONNEIL

Directrice générale adjointe

Je vous demande de transmettre toute demande de modifications concernant ce dossier par courriel adressé à la boîte : [ams-essaiscliniques@ansm.sante.fr](mailto:ams-essaiscliniques@ansm.sante.fr). Lors de l'envoi de ces dossiers, je vous demande de veiller à reporter dans l'objet du message la mention : **MSA/ N° EUDRACT** pour les MS soumises pour autorisation ou pour les dossiers mixtes (comportant des modifications soumises pour autorisation et d'autres pour information).

**Confidentialité**

Cette transmission est à l'attention exclusive du(des) destinataires ci-dessus mentionné(s) et peut contenir des informations privilégiées et/ou confidentielles. Si vous n'êtes pas le destinataire voulu ou une personne mandatée pour lui remettre cette transmission, vous avez reçu ce document par erreur et toute utilisation, révélation, copie ou communication de son contenu est interdite. Si vous avez reçu cette transmission par erreur, veuillez nous en informer par téléphone immédiatement et nous retourner le message original par courrier. Merci.

**Confidentiality**

This transmission is intended to the addressee(s) listed above only and may contain preferential or/and confidential information. If you are not the intended recipient, you are hereby notified that you have received the document by mistake and any use, disclosure, copying or communication of the content of this transmission is prohibited. If you have received this transmission by mistake, please call us immediately and return the original message by mail. Thank you.

code : AEC\_FOR027 v03



# CPP Ile de France XI

## Comité de Protection des Personnes

St-Germain-en-Laye, le 8 Avril 2020

**APHP**  
**Mme Fadila AMERALI**  
**Carré Historique de l'Hôpital Saint-Louis**  
**Secteur Gris - Porte 23**  
**1 avenue Claude Vellefaux**  
**75475 PARIS**

|                           |                                                                                                                             |
|---------------------------|-----------------------------------------------------------------------------------------------------------------------------|
| <b>Titre de l'essai :</b> | <b>Dexamethasone et stratégies d'oxygénation des patients hospitalisés en réanimation atteints de pneumonies à Covid-19</b> |
| <b>Promoteur :</b>        | <b>APHP</b>                                                                                                                 |
| <b>Investigateur :</b>    | <b>Pr Jean-François TIMSIT</b>                                                                                              |
| <b>Réf. Promoteur :</b>   | <b>APHP 200388-COVIDICUS</b>                                                                                                |
| <b>N° IDRCB :</b>         | <b>2020-001457-43</b>                                                                                                       |
| <b>Réf. CPP :</b>         | <b>20037-25957</b>                                                                                                          |

|                                                                                                                                                                 |          |
|-----------------------------------------------------------------------------------------------------------------------------------------------------------------|----------|
| <b>Demande d'avis valant autorisation sur une recherche de catégorie 1</b>                                                                                      | <b>X</b> |
| Demande d'avis valant autorisation sur une recherche de catégorie 2                                                                                             |          |
| Demande d'avis valant autorisation sur une recherche de catégorie 3                                                                                             |          |
| Demande d'avis consultatif sur un changement substantiel de finalité dans l'utilisation d'une collection d'éléments biologiques humains (art. L. 1211-2 du CSP) |          |
| Demande d'avis consultatif sur un projet de déclaration de constitution d'une collection d'échantillons biologiques humains (art. L. 1243-3 du CSP)             |          |

| <b>Documents examinés</b>                                                   |                           |
|-----------------------------------------------------------------------------|---------------------------|
| <b>Numéro et date de version</b>                                            |                           |
| Le courrier de demande d'autorisation ANSM                                  | 01/04/2020                |
| Courrier de demande d'avis                                                  | 01/04/2020                |
| Courrier de réponse du promoteur                                            | 06/04/2020                |
| CTAForm                                                                     | 01/04/2020                |
| Le document additionnel à la demande destiné au CPP                         | 01/04/2020                |
| Protocole                                                                   | Version 1-1 du 06/04/2020 |
| Résumé                                                                      | Version n°1 du 31/03/2020 |
| La lettre d'information et le formulaire de consentement : poursuite proche | V1-1 du 06/04/2020        |
| La lettre d'information et le formulaire de consentement : proche           | V1-1 du 06/04/2020        |
| La lettre d'information et le formulaire de consentement : poursuite        | V1-1 du 06/04/2020        |

**Sabine de la PORTE**, Présidente – **Léon LOISEAU**, Vice-président – **Michèle CATZ**, Secrétaire générale  
**Kolia MILOJEVIC**, Vice-secrétaire Général  
**Anne-Elisabeth DECARIS**, Assistante  
Pavillon Jacques Courtois – 2<sup>ème</sup> étage, 20, rue Armagis 78105 Saint Germain en Laye Cedex  
Tél : 01.39.27.42.58 - Fax : 01.39.27.49.01  
E.mail : cpidf11.chips@ght-yvelinesnord.fr

# CPP Ile de France XI

## Comité de Protection des Personnes

|                  |                       |
|------------------|-----------------------|
| Réf. Promoteur : | APHP 200388-COVIDICUS |
| N° IDRCB :       | 2020-001457-43        |
| Réf. CPP :       | 20037-25957           |

|                                                                          |                           |
|--------------------------------------------------------------------------|---------------------------|
| La lettre d'information et le formulaire de consentement : majeur        | V1-1 du 06/04/2020        |
| Lettre d'information d'utilisation des données après le décès du patient | V1 du 04/04/2020          |
| La carte patient                                                         | Jointe                    |
| Les CV des Investigateurs Principaux                                     | Joint                     |
| La liste des investigateurs                                              | V1-1 du 06/04/2020        |
| La justification de l'adéquation des moyens                              | Jointe                    |
| La copie de l'attestation d'assurance                                    | 30/03/2020                |
| La charte du CSI                                                         | Version n°1 du 01/04/2020 |
| RCP produits utilisés                                                    | Joint                     |

J'ai bien reçu les modifications demandées lors de la séance du **3 AVRIL 2020** concernant le projet de recherche référencé ci-dessus.

Ont participé à la délibération :

### I – PREMIER COLLEGE

Didier ARMENGAUD  
Annie DURAND  
Axel LEVIER  
Gérard LOEB  
Kolia MILOJEVIC  
Sabine de la PORTE  
Ariane QUEFFELEC

Pédiatre  
Pharmacien  
Ingénieur  
Médecin  
Biostatisticien  
Chercheur  
Médecin

### II - DEUXIEME COLLEGE

Michèle CATZ  
Jean-François LAIGNEAU  
Odile LACHAUD  
Olivier LANTRES

Psychologue  
Avocat  
Représentant UDAF 78  
Avocat

*Aucun membre délibérant du comité n'est affecté par un conflit d'intérêt.*

Par conséquent je donne l'**AVIS FAVORABLE** de notre Comité pour cette recherche.

Veillez croire, Madame, Monsieur, l'assurance de mes sentiments les meilleurs.

**Michèle CATZ, Secrétaire Générale du CPP IDF XI**



---

Sabine de la PORTE, Présidente – Léon LOISEAU, Vice-président – Michèle CATZ, Secrétaire générale  
Kolia MILOJEVIC, Vice-secrétaire Général  
Anne-Elisabeth DECARIS, Assistante  
Pavillon Jacques Courtois – 2<sup>ème</sup> étage, 20, rue Armagis 78105 Saint Germain en Laye Cedex  
Tél : 01.39.27.42.58 - Fax : 01.39.27.49.01  
E.mail : cppidf11.chips@ght-yvelinesnord.fr

# CPP Ile de France XI

## Comité de Protection des Personnes

|                  |                       |
|------------------|-----------------------|
| Réf. Promoteur : | APHP 200388-COVIDICUS |
| N° IDRCB :       | 2020-001457-43        |
| Réf. CPP :       | 20037-25957           |

---

**Sabine de la PORTE**, Présidente – **Léon LOISEAU**, Vice-président – Michèle **CATZ**, Secrétaire générale  
**Kolia MILOJEVIC**, Vice-secrétaire Général  
**Anne-Elisabeth DECARIS**, Assistante  
Pavillon Jacques Courtois – 2<sup>ème</sup> étage, 20, rue Armagis 78105 Saint Germain en Laye Cedex  
Tél : 01.39.27.42.58 - Fax : 01.39.27.49.01  
E.mail : cpidf11.chips@ght-yvelinesnord.fr

# CPP Ile de France XI

## Comité de Protection des Personnes

---

St-Germain-en-Laye, le 30 Avril 2020

**APHP**  
**Mme Fadila AMERALI**  
**Carré Historique de l'Hôpital Saint-Louis**  
**Secteur Gris - Porte 23**  
**1 avenue Claude Vellefaux**  
**75475 PARIS**

|                           |                                                                                                                             |
|---------------------------|-----------------------------------------------------------------------------------------------------------------------------|
| <b>Titre de l'essai :</b> | <b>Dexamethasone et stratégies d'oxygénation des patients hospitalisés en réanimation atteints de pneumonies à Covid-19</b> |
| <b>Promoteur :</b>        | <b>APHP</b>                                                                                                                 |
| <b>Investigateur :</b>    | <b>Pr Jean-François TIMSIT</b>                                                                                              |
| <b>Réf. Promoteur :</b>   | <b>APHP 200388-COVIDICUS</b>                                                                                                |
| <b>N° IDRCB :</b>         | <b>2020-001457-43</b>                                                                                                       |
| <b>Réf. CPP :</b>         | <b>20037-25957</b>                                                                                                          |

|                                                                                                                                                                 |          |
|-----------------------------------------------------------------------------------------------------------------------------------------------------------------|----------|
| <b>Demande d'avis valant autorisation sur une recherche de catégorie 1</b>                                                                                      | <b>X</b> |
| Demande d'avis valant autorisation sur une recherche de catégorie 2                                                                                             |          |
| Demande d'avis valant autorisation sur une recherche de catégorie 3                                                                                             |          |
| Demande d'avis consultatif sur un changement substantiel de finalité dans l'utilisation d'une collection d'éléments biologiques humains (art. L. 1211-2 du CSP) |          |
| Demande d'avis consultatif sur un projet de déclaration de constitution d'une collection d'échantillons biologiques humains (art. L. 1243-3 du CSP)             |          |

| <b>Modification Substantielle 1</b>                                         |                         |
|-----------------------------------------------------------------------------|-------------------------|
| <b>Documents examinés</b>                                                   |                         |
| <b>Numéro et date de version</b>                                            |                         |
| Formulaire de demande de MS                                                 | Non daté                |
| Courrier de demande d'avis                                                  | 29/04/2020              |
| Tableau des modifications                                                   | Joint                   |
| Protocole                                                                   | Version 2 du 23/04/2020 |
| La lettre d'information et le formulaire de consentement : poursuite proche | Version 2 du 23/04/2020 |
| La lettre d'information et le formulaire de consentement : proche           | Version 2 du 23/04/2020 |
| La lettre d'information et le formulaire de consentement : poursuite        | Version 2 du 23/04/2020 |
| La lettre d'information et le formulaire de consentement : majeur           | Version 2 du 23/04/2020 |

---

**Sabine de la PORTE**, Présidente – **Léon LOISEAU**, Vice-président – **Michèle CATZ**, Secrétaire générale  
**Kolia MILOJEVIC**, Vice-secrétaire Général  
**Anne-Elisabeth DECARIS**, Assistante  
Pavillon Jacques Courtois – 2<sup>ème</sup> étage, 20, rue Armagis 78105 Saint Germain en Laye Cedex  
Tél : 01.39.27.42.58 - Fax : 01.39.27.49.01  
E.mail : cppidf11.chips@ght-yvelinesnord.fr

# CPP Ile de France XI

## Comité de Protection des Personnes

|                  |                       |
|------------------|-----------------------|
| Réf. Promoteur : | APHP 200388-COVIDICUS |
| N° IDRCB :       | 2020-001457-43        |
| Réf. CPP :       | 20037-25957           |

|                                                                          |                         |
|--------------------------------------------------------------------------|-------------------------|
| Lettre d'information d'utilisation des données après le décès du patient | Version 2 du 23/04/2020 |
| CV des nouveaux investigateurs Principaux                                | Joint                   |
| La liste des investigateurs                                              | Version 2 du 23/04/2020 |

Le CPP Ile de France XI a examiné dans sa séance en comité restreint du 30 AVRIL 2020, la modification substantielle n°1 au projet de recherche référencé ci-dessus.

Ont participé à la délibération :

### I – PREMIER COLLEGE

|                    |                 |
|--------------------|-----------------|
| Annie DURAND       | Pharmacien      |
| Axel LEVIER        | Ingénieur       |
| Kolia MILOJEVIC    | Biostatisticien |
| Sabine de la PORTE | Chercheur       |
| Ariane QUEFFELEC   | Médecin         |

### II - DEUXIEME COLLEGE

|                   |                                     |
|-------------------|-------------------------------------|
| Michèle CATZ      | Psychologue                         |
| Odile LACHAUD     | Représentant UDAF 78                |
| Olivier LANTRES   | Avocat                              |
| Léon LOISEAU      | Philosophe                          |
| Christine GHESTEM | Association des familles du Vésinet |

*Aucun membre délibérant du comité n'est affecté par un conflit d'intérêt.*

J'ai l'honneur de vous informer que le comité a donné pour cette modification substantielle :

### **UN AVIS FAVORABLE**

Cette modification substantielle consiste principalement en :

- L'ajout de deux études ancillaires
  - La première propose d'étudier le devenir à long terme des sujets
  - La seconde vise à étudier les paramètres thrombo-inflammatoires des patients ayant une infection à Covid-19 (la relation entre l'administration de corticoïdes et le fonctionnement des globules blancs) dans deux centres, le CHU Bichat et le CHU de Strasbourg).
- L'ajout d'un questionnaire en fin de suivi à J60 : questionnaire de qualité de vie à réaliser au téléphone pour les patients sortis d'hospitalisation afin d'évaluer le retour à leur niveau d'activité avant l'infection COVID.
- Des précisions apportées à la description de la population concernée par oxygénothérapie.
- L'ajout d'objectifs secondaires concernant l'étude de l'oxygénothérapie.
- L'actualisation de la liste des investigateurs : il manque la formation au BPC du Dr. GARCON et l'autorisation des lieux de recherche.

---

Sabine de la PORTE, Présidente – Léon LOISEAU, Vice-président – Michèle CATZ, Secrétaire générale  
Kolia MILOJEVIC, Vice-secrétaire Général  
Anne-Elisabeth DECARIS, Assistante  
Pavillon Jacques Courtois – 2<sup>ème</sup> étage, 20, rue Armagis 78105 Saint Germain en Laye Cedex  
Tél : 01.39.27.42.58 - Fax : 01.39.27.49.01  
E.mail : cppidf11.chips@ght-yvelinesnord.fr

# CPP Ile de France XI

## Comité de Protection des Personnes

|                  |                       |
|------------------|-----------------------|
| Réf. Promoteur : | APHP 200388-COVIDICUS |
| N° IDRCB :       | 2020-001457-43        |
| Réf. CPP :       | 20037-25957           |

Le CPP a étudié en séance la V2 d'une LETTRE D'INFORMATION RELATIVE A L'UTILISATION DES DONNEES POUR UN PARENT/PROCHE/PERSONNE DE CONFIANCE APRES LE DECES DU PATIENT qui n'était pas dans le dossier d'origine mais avait été ajoutée à la réponse du promoteur (courrier du 06/04/2020).

### Remarques/corrections à faire :

Page 1 : « ....la loi (Art. L. 1122-1-2 du CSP) nous a permis de l'inclure ... » .

Page 2 Fin du §3 : « Vous avez la possibilité à tout moment de demander au médecin investigateur qui suivait **votre proche** dans le cadre... » .

Page 2 §4 : « ... données médicales concernant votre proche qui **sont eterecueillies**» **Corriger.**

Page 3 fin du § 5 : Supprimer la phrase inadaptée : « Si vous décidez d'arrêter sa participation à la recherche, les données recueillies... »

Page 4 section 6 : Supprimer les formules inadaptées : « La participation de votre proche nécessite que nous informions son médecin traitant sauf si vous vous y opposez. » « Après avoir lu toutes ces informations, **discuté tous les aspects avec le médecin** et après avoir bénéficié d'un temps de réflexion suffisant **si vous acceptez que votre proche participe** »

Proche est masculin : supprimer les (e) dans toutes les occurrences, exemple : « Votre proche Mme, M. (barrer les mentions inutiles) ..... (nom, prénom) avait été **admis(e)**... ».

A la fin du document le recueil de l'« Opposition exprimée par la personne de confiance ou le proche ou le parent » n'est pas clair : s'agit-il d'un appel téléphonique ? Le CPP propose 2 options :

- soit prévoir le **recueil de la signature** du PARENT/PROCHE/PERSONNE DE CONFIANCE

- soit prévoir l'envoi d'un courrier précisant :

« En l'absence d'opposition de votre part dans un délai d'un mois à compter de l'envoi de la note d'information, les données de votre proche seront conservées et analysées dans le cadre de ce projet de recherche.

Pour exprimer votre droit d'opposition à l'utilisation de ses données dans le cadre de la recherche ou afin d'obtenir de plus amples informations sur cette étude, veuillez contacter le médecin investigateur (nom...) ayant pris en charge votre proche ou le Délégué à la Protection des données (DPO) à l'adresse suivante :.... »

Dans tous les cas prévoir de noter dans le dossier du patient, la date de la délivrance/l'envoi de l'information, le nom et la qualité du destinataire et le nom du médecin/responsable qui s'est chargé de l'envoi.

**Clarifier**

**Sabine de la Porte, Présidente de Séance**



Sabine de la PORTE, Présidente – Léon LOISEAU, Vice-président – Michèle CATZ, Secrétaire générale

Kolia MILOJEVIC, Vice-secrétaire Général

Anne-Elisabeth DECARIS, Assistante

Pavillon Jacques Courtois – 2<sup>ème</sup> étage, 20, rue Armagis 78105 Saint Germain en Laye Cedex

Tél : 01.39.27.42.58 - Fax : 01.39.27.49.01

E.mail : cppidf11.chips@ght-yvelinesnord.fr

# CPP Ile de France XI

## Comité de Protection des Personnes

---

St-Germain-en-Laye, le 22 juillet 2020

**APHP**  
**Mme Fadila AMERALI**  
**Carré Historique de l'Hôpital Saint-Louis**  
**Secteur Gris - Porte 23**  
**1 avenue Claude Vellefaux**  
**75475 PARIS**

|                           |                                                                                                                             |
|---------------------------|-----------------------------------------------------------------------------------------------------------------------------|
| <b>Titre de l'essai :</b> | <b>Dexamethasone et stratégies d'oxygénation des patients hospitalisés en réanimation atteints de pneumonies à Covid-19</b> |
| <b>Promoteur :</b>        | <b>APHP</b>                                                                                                                 |
| <b>Investigateur :</b>    | <b>Pr Jean-François TIMSIT</b>                                                                                              |
| <b>Réf. Promoteur :</b>   | <b>APHP 200388-COVIDICUS</b>                                                                                                |
| <b>N° IDRCB :</b>         | <b>2020-001457-43</b>                                                                                                       |
| <b>Réf. CPP :</b>         | <b>20037-25957</b>                                                                                                          |

|                                                                                                                                                                 |          |
|-----------------------------------------------------------------------------------------------------------------------------------------------------------------|----------|
| <b>Demande d'avis valant autorisation sur une recherche de catégorie 1</b>                                                                                      | <b>X</b> |
| Demande d'avis valant autorisation sur une recherche de catégorie 2                                                                                             |          |
| Demande d'avis valant autorisation sur une recherche de catégorie 3                                                                                             |          |
| Demande d'avis consultatif sur un changement substantiel de finalité dans l'utilisation d'une collection d'éléments biologiques humains (art. L. 1211-2 du CSP) |          |
| Demande d'avis consultatif sur un projet de déclaration de constitution d'une collection d'échantillons biologiques humains (art. L. 1243-3 du CSP)             |          |

| <b>Modification Substantielle 2</b>                                         |                         |
|-----------------------------------------------------------------------------|-------------------------|
| <b>Documents examinés</b>                                                   |                         |
| <b>Numéro et date de version</b>                                            |                         |
| Formulaire de demande de MS                                                 | 15/07/2020              |
| Courrier de demande d'avis                                                  | 17/07/2020              |
| Tableau comparatif des modifications                                        | Joint                   |
| Protocole                                                                   | Version 3 du 09/07/2020 |
| La lettre d'information et le formulaire de consentement : poursuite proche | Version 3 du 09/07/2020 |
| La lettre d'information et le formulaire de consentement : proche           | Version 3 du 09/07/2020 |
| La lettre d'information et le formulaire de consentement : poursuite        | Version 3 du 09/07/2020 |
| La lettre d'information et le formulaire de consentement : majeur           | Version 3 du 09/07/2020 |
| CV du nouvel investigateur                                                  | Joint                   |

---

**Sabine de la PORTE**, Présidente – **Léon LOISEAU**, Vice-président – **Michèle CATZ**, Secrétaire générale  
**Kolia MILOJEVIC**, Vice-secrétaire Général  
**Anne-Elisabeth DECARIS**, Assistante  
Pavillon Jacques Courtois – 2<sup>ème</sup> étage, 20, rue Armagis 78105 Saint Germain en Laye Cedex  
Tél : 01.39.27.42.58 - Fax : 01.39.27.49.01  
E.mail : cpidf11.chips@ght-yvelinesnord.fr

# CPP Ile de France XI

## Comité de Protection des Personnes

|                  |                       |
|------------------|-----------------------|
| Réf. Promoteur : | APHP 200388-COVIDICUS |
| N° IDRCB :       | 2020-001457-43        |
| Réf. CPP :       | 20037-25957           |

|                                     |                         |
|-------------------------------------|-------------------------|
| La liste des investigateurs         | Version 3 du 09/07/2020 |
| Compte rendu du comité scientifique | Du 03/07/2020           |
| Compte rendu du CSI                 | Du 06/07/2020           |

**Le CPP Ile de France XI a examiné dans sa séance en comité restreint du 22 JUILLET 2020, la modification substantielle n°2 au projet de recherche référencé ci-dessus.**

Ont participé à la délibération :

### I – PREMIER COLLEGE

Axel LEVIER  
Kolia MILOJEVIC  
Sabine de la PORTE  
Ariane QUEFFELEC

Ingénieur  
Biostatisticien  
Chercheur  
Médecin

### II - DEUXIEME COLLEGE

Léon LOISEAU  
Christine GHESTEM  
Nicole TAVERNY

Philosophe  
Association des familles du Vésinet  
Association des familles du Vésinet

*Aucun membre délibérant du comité n'est affecté par un conflit d'intérêt.*

J'ai l'honneur de vous informer que le comité a donné pour cette modification substantielle :

### **UN AVIS FAVORABLE**

Cette modification substantielle consiste principalement en :

#### 1. Modification du protocole de prise en charge du bras pharmacologique « Placebo »

**Justification du promoteur :** A la suite des premiers résultats de l'étude RECOVERY le comité scientifique de l'étude COVIDICUS s'est réuni le 3 juillet 2020, et, conscient de la possibilité d'un effet sur la mortalité des patients hospitalisés sous oxygène, propose de laisser à l'appréciation de l'investigateur en charge du patient la possibilité d'administrer 6 mg de dexaméthasone selon le régime de l'étude RECOVERY à l'ensemble des malades inclus dans les 2 bras de randomisation.

#### **Remarque du CPP :**

**Si l'étude RECOVERY ne remet pas en question l'étude COVIDICUS, l'adaptation du protocole est nécessaire pour des raisons éthiques. La solution proposée est un bon compromis entre la protection des patients et le maintien de la performance méthodologique de l'étude.**

**Il existe, sur le plan statistique, une perte de contraste par la division du groupe contrôle en 2 sous-groupes. Au lieu de comparer 20 mg à 0 mg, on va désormais comparer 20 mg à un groupe comprenant du 0 et du 6 mg.**

**Pour ne pas trop perdre en puissance méthodologique, il est important :**

- **De verrouiller le groupe 6 mg à 6 mg. En effet, il ne faut pas qu'en plus de choisir 0 ou 6, l'investigateur ait la possibilité de prescrire 8 ou 15 mg, car alors, la comparaison devient totalement floue et inopérante.**

---

Sabine de la PORTE, Présidente – Léon LOISEAU, Vice-président – Michèle CATZ, Secrétaire générale  
Kolia MILOJEVIC, Vice-secrétaire Général  
Anne-Elisabeth DECARIS, Assistante  
Pavillon Jacques Courtois – 2<sup>ème</sup> étage, 20, rue Armagis 78105 Saint Germain en Laye Cedex  
Tél : 01.39.27.42.58 - Fax : 01.39.27.49.01  
E.mail : cppidf11.chips@ght-yvelinesnord.fr



# CPP Ile de France XI

## Comité de Protection des Personnes

|                  |                       |
|------------------|-----------------------|
| Réf. Promoteur : | APHP 200388-COVIDICUS |
| N° IDRCB :       | 2020-001457-43        |
| Réf. CPP :       | 20037-25957           |

- De conserver la connaissance du sous-groupe 0 ou 6 afin de prévoir des analyses comparant en critère majeur : groupe 20 mg à groupe 0-6 mg, et en critères complémentaires 20 mg à 0 mg, 20 mg à 6 mg, 0 à 6 mg. Même si la décision entre 0 et 6 n'est pas un TAS, ces comparaisons séparément et rassemblées, auront un intérêt dans l'interprétation finale.

2. Ajout d'un nouveau centre dans l'étude
3. Augmentation de la durée d'inclusion de l'étude de 8 mois.

**Remarque du CPP : vérifier la validité de l'assurance**

**Sabine de la PORTE, Présidente de séance**



Supplement: jamainternmed-e222168-s001.pdf [file jamainternmed-e222168-s001.pdf]
