# Supplementary material
Source: PubMed Central journal article supplement (PMC9449796)
Supplement: jamainternmed-e222168-s003.pdf [file jamainternmed-e222168-s003.pdf]

\*First name, last name, and suffix (if applicable) are required and will appear in PubMed.

| <b>*Group Name(s): COVIDICUS Study Group</b> |                   |                              |                  |                                         |                                          |                                                         |                                                                                            |
|----------------------------------------------|-------------------|------------------------------|------------------|-----------------------------------------|------------------------------------------|---------------------------------------------------------|--------------------------------------------------------------------------------------------|
| <b>*First Name and Middle Initial(s)</b>     | <b>*Last Name</b> | <b>*Suffix (eg, Jr, III)</b> | Academic Degrees | Institution                             | Location (city, state/province, country) | Role or Contribution, eg, chair, principal investigator | Group (if more than 1 Group listed in the byline and/or Subgroup (eg, Steering Committee)) |
| Naima                                        | Beldjoudi         |                              |                  | APHP Delegation a la recherche clinique |                                          |                                                         |                                                                                            |
| Sylvie                                       | Chevret           |                              |                  | APHP Delegation a la recherche clinique |                                          |                                                         |                                                                                            |
| Charles                                      | Burdet            |                              |                  | APHP Delegation a la recherche clinique |                                          |                                                         |                                                                                            |
| Céline                                       | Alloux            |                              |                  | APHP Delegation a la recherche clinique |                                          |                                                         |                                                                                            |
| Fadila                                       | Amerali           |                              |                  | APHP Delegation a la recherche clinique |                                          |                                                         |                                                                                            |
| Béatrice                                     | Andriss           |                              |                  | APHP Delegation a la recherche clinique |                                          |                                                         |                                                                                            |
| Kamyl                                        | Baghli            |                              |                  | APHP Delegation a la recherche clinique |                                          |                                                         |                                                                                            |
| Hélène                                       | Brocvielle        |                              |                  | APHP Delegation a la recherche clinique |                                          |                                                         |                                                                                            |
| Florence                                     | Capelle           |                              |                  | APHP Delegation a la recherche clinique |                                          |                                                         |                                                                                            |
| Ines                                         | Chibane           |                              |                  | APHP Delegation a la recherche clinique |                                          |                                                         |                                                                                            |
| Sarra                                        | Dalibey           |                              |                  | APHP Delegation a la recherche clinique |                                          |                                                         |                                                                                            |
| Nadia                                        | Ettalhaoui        |                              |                  | APHP Delegation a la recherche clinique |                                          |                                                         |                                                                                            |
| Sabrina                                      | Lamri             |                              |                  | APHP Delegation a la recherche clinique |                                          |                                                         |                                                                                            |
| Yohan                                        | Maurer            |                              |                  | APHP Delegation a la recherche clinique |                                          |                                                         |                                                                                            |
| Jean-Marc                                    | Mintsa            |                              |                  | APHP Delegation a la recherche clinique |                                          |                                                         |                                                                                            |
| Alice                                        | Oubahim           |                              |                  | APHP Delegation a la recherche clinique |                                          |                                                         |                                                                                            |
| Marie-Capucine                               | Tellier           |                              |                  | APHP Delegation a la recherche clinique |                                          |                                                         |                                                                                            |
| Imane                                        | Zemihi            |                              |                  | APHP Delegation a la recherche clinique |                                          |                                                         |                                                                                            |
| Lila                                         | Bouadma           |                              |                  | APHP Bichat hospital                    |                                          |                                                         |                                                                                            |
| Moustafa                                     | Abdel-Nabey       |                              |                  | APHP Bichat hospital                    |                                          |                                                         |                                                                                            |
| Billal                                       | Azzouguen         |                              |                  | APHP Bichat hospital                    |                                          |                                                         |                                                                                            |
| Ghenima                                      | Belkessa          |                              |                  | APHP Bichat hospital                    |                                          |                                                         |                                                                                            |
| Etienne                                      | De Montmollin     |                              |                  | APHP Bichat hospital                    |                                          |                                                         |                                                                                            |
| Veronique                                    | Deiler            |                              |                  | APHP Bichat hospital                    |                                          |                                                         |                                                                                            |
| Claire                                       | Dupuis            |                              |                  | APHP Bichat hospital                    |                                          |                                                         |                                                                                            |
| Aline                                        | Fallet            |                              |                  | APHP Bichat hospital                    |                                          |                                                         |                                                                                            |
| Guillaume                                    | Franchineau       |                              |                  | APHP Bichat hospital                    |                                          |                                                         |                                                                                            |
| Tiphaine                                     | Girard            |                              |                  | APHP Bichat hospital                    |                                          |                                                         |                                                                                            |
| Alexandra                                    | Grinea            |                              |                  | APHP Bichat hospital                    |                                          |                                                         |                                                                                            |

## Supplemental Online Content: Nonauthor Collaborators

\*First name, last name, and suffix (if applicable) are required and will appear in PubMed.

| *First Name and Middle Initial(s) | *Last Name          | *Suffix (eg, Jr, III) | Academic Degrees | Institution                             | Location (city, state/province, country) | Role or Contribution, eg, chair, principal investigator | Group (if more than 1 Group listed in the byline) and/or Subgroup (eg, Steering Committee) |
|-----------------------------------|---------------------|-----------------------|------------------|-----------------------------------------|------------------------------------------|---------------------------------------------------------|--------------------------------------------------------------------------------------------|
| Pierre                            | Jaquet              |                       |                  | APHP Bichat hospital                    |                                          |                                                         |                                                                                            |
| Laura                             | Kramer              |                       |                  | APHP Bichat hospital                    |                                          |                                                         |                                                                                            |
| Fariza                            | Lamara              |                       |                  | APHP Bichat hospital                    |                                          |                                                         |                                                                                            |
| Lucie                             | Lefevre             |                       |                  | APHP Bichat hospital                    |                                          |                                                         |                                                                                            |
| Mehdi                             | Marzouk             |                       |                  | APHP Bichat hospital                    |                                          |                                                         |                                                                                            |
| Juliette                          | Patrier             |                       |                  | APHP Bichat hospital                    |                                          |                                                         |                                                                                            |
| Simona                            | Presente            |                       |                  | APHP Bichat hospital                    |                                          |                                                         |                                                                                            |
| Faiza                             | Sayagh              |                       |                  | APHP Bichat hospital                    |                                          |                                                         |                                                                                            |
| Fabrice                           | Sinnah              |                       |                  | APHP Bichat hospital                    |                                          |                                                         |                                                                                            |
| Romain                            | Sonneville          |                       |                  | APHP Bichat hospital                    |                                          |                                                         |                                                                                            |
| Paul-Henri                        | Wicky               |                       |                  | APHP Bichat hospital                    |                                          |                                                         |                                                                                            |
| Sylia                             | Zmihi               |                       |                  | APHP Bichat hospital                    |                                          |                                                         |                                                                                            |
| Yves                              | Cohen               |                       |                  | APHP Avicenne hospital, Bobigny, France |                                          |                                                         |                                                                                            |
| Nathalie                          | Barget              |                       |                  | APHP Avicenne hospital, Bobigny, France |                                          |                                                         |                                                                                            |
| Rawan                             | Belmokhtar          |                       |                  | APHP Avicenne hospital, Bobigny, France |                                          |                                                         |                                                                                            |
| Sabrina                           | Brahmi              |                       |                  | APHP Avicenne hospital, Bobigny, France |                                          |                                                         |                                                                                            |
| Naoual                            | Djabra              |                       |                  | APHP Avicenne hospital, Bobigny, France |                                          |                                                         |                                                                                            |
| Nathan                            | Ebstein             |                       |                  | APHP Avicenne hospital, Bobigny, France |                                          |                                                         |                                                                                            |
| Souha                             | Fliss               |                       |                  | APHP Avicenne hospital, Bobigny, France |                                          |                                                         |                                                                                            |
| Amina                             | Gourbdji            |                       |                  | APHP Avicenne hospital, Bobigny, France |                                          |                                                         |                                                                                            |
| William                           | Juguet              |                       |                  | APHP Avicenne hospital, Bobigny, France |                                          |                                                         |                                                                                            |
| Fadhila                           | Messani             |                       |                  | APHP Avicenne hospital, Bobigny, France |                                          |                                                         |                                                                                            |
| Thomas                            | Rambaud             |                       |                  | APHP Avicenne hospital, Bobigny, France |                                          |                                                         |                                                                                            |
| Vanessa                           | Rathouin            |                       |                  | APHP Avicenne hospital, Bobigny, France |                                          |                                                         |                                                                                            |
| mani                              | Rebai               |                       |                  | APHP Avicenne hospital, Bobigny, France |                                          |                                                         |                                                                                            |
| Marthe                            | Rigal               |                       |                  | APHP Avicenne hospital, Bobigny, France |                                          |                                                         |                                                                                            |
| Julien                            | Schmidt             |                       |                  | APHP Avicenne hospital, Bobigny, France |                                          |                                                         |                                                                                            |
| Marie                             | Soulie              |                       |                  | APHP Avicenne hospital, Bobigny, France |                                          |                                                         |                                                                                            |
| Yacine                            | Tandjaoui-Lombiotte |                       |                  | APHP Avicenne hospital, Bobigny, France |                                          |                                                         |                                                                                            |
| Anaïs                             | Winchenne           |                       |                  | APHP Avicenne hospital, Bobigny, France |                                          |                                                         |                                                                                            |
| Marianne                          | Ziol                |                       |                  | APHP Avicenne hospital, Bobigny, France |                                          |                                                         |                                                                                            |

## Supplemental Online Content: Nonauthor Collaborators

\*First name, last name, and suffix (if applicable) are required and will appear in PubMed.

| *First Name and Middle Initial(s) | *Last Name          | *Suffix (eg, Jr, III) | Academic Degrees | Institution                                | Location (city, state/province, country) | Role or Contribution, eg, chair, principal investigator | Group (if more than 1 Group listed in the byline) and/or Subgroup (eg, Steering Committee) |
|-----------------------------------|---------------------|-----------------------|------------------|--------------------------------------------|------------------------------------------|---------------------------------------------------------|--------------------------------------------------------------------------------------------|
| Romain                            | Arrestier           |                       |                  | APHP Henri Mondor hospital Creteil, France |                                          |                                                         |                                                                                            |
| François                          | Bagate              |                       |                  | APHP Henri Mondor hospital Creteil, France |                                          |                                                         |                                                                                            |
| Morgan                            | Benais              |                       |                  | APHP Henri Mondor hospital Creteil, France |                                          |                                                         |                                                                                            |
| Ines                              | Bendib              |                       |                  | APHP Henri Mondor hospital Creteil, France |                                          |                                                         |                                                                                            |
| LE                                | Lan                 |                       |                  | APHP Henri Mondor hospital Creteil, France |                                          |                                                         |                                                                                            |
| Brice                             | Benelli             |                       |                  | APHP Henri Mondor hospital Creteil, France |                                          |                                                         |                                                                                            |
| Enora                             | Berti               |                       |                  | APHP Henri Mondor hospital Creteil, France |                                          |                                                         |                                                                                            |
| Astrid                            | Bertier             |                       |                  | APHP Henri Mondor hospital Creteil, France |                                          |                                                         |                                                                                            |
| Guillaume                         | Carteaux            |                       |                  | APHP Henri Mondor hospital Creteil, France |                                          |                                                         |                                                                                            |
| Muriel                            | Carvalho            |                       |                  | APHP Henri Mondor hospital Creteil, France |                                          |                                                         |                                                                                            |
| Pedro                             | Cavaleiro           |                       |                  | APHP Henri Mondor hospital Creteil, France |                                          |                                                         |                                                                                            |
| Nicolas                           | Deprost             |                       |                  | APHP Henri Mondor hospital Creteil, France |                                          |                                                         |                                                                                            |
| Otto                              | Hartman             |                       |                  | APHP Henri Mondor hospital Creteil, France |                                          |                                                         |                                                                                            |
| Anne-Fleur                        | Haudebourg          |                       |                  | APHP Henri Mondor hospital Creteil, France |                                          |                                                         |                                                                                            |
| Delphine                          | Le Febvre De Nailly |                       |                  | APHP Henri Mondor hospital Creteil, France |                                          |                                                         |                                                                                            |
| Julien                            | Lopinto             |                       |                  | APHP Henri Mondor hospital Creteil, France |                                          |                                                         |                                                                                            |
| Sabrina                           | Mahiou              |                       |                  | APHP Henri Mondor hospital Creteil, France |                                          |                                                         |                                                                                            |
| Paul                              | Masi                |                       |                  | APHP Henri Mondor hospital Creteil, France |                                          |                                                         |                                                                                            |
| Gaël                              | Michaud             |                       |                  | APHP Henri Mondor hospital Creteil, France |                                          |                                                         |                                                                                            |
| Luiza                             | Nait-Chabane        |                       |                  | APHP Henri Mondor hospital Creteil, France |                                          |                                                         |                                                                                            |
| Fariza                            | Ouali               |                       |                  | APHP Henri Mondor hospital Creteil, France |                                          |                                                         |                                                                                            |
| François                          | Perier              |                       |                  | APHP Henri Mondor hospital Creteil, France |                                          |                                                         |                                                                                            |
| Keyvan                            | Razazi              |                       |                  | APHP Henri Mondor hospital Creteil, France |                                          |                                                         |                                                                                            |
| Thiziri                           | Sadaoui             |                       |                  | APHP Henri Mondor hospital Creteil, France |                                          |                                                         |                                                                                            |
| Alaki                             | Thiemele            |                       |                  | APHP Henri Mondor hospital Creteil, France |                                          |                                                         |                                                                                            |
| Samuel                            | Tuffet              |                       |                  | APHP Henri Mondor hospital Creteil, France |                                          |                                                         |                                                                                            |
| Flavien                           | Autron              |                       |                  | CHRU Lille Roger Salengro, France          |                                          |                                                         |                                                                                            |
| Pauline                           | Boddaert            |                       |                  | CHRU Lille Roger Salengro, France          |                                          |                                                         |                                                                                            |
| Sylvie                            | Brice               |                       |                  | CHRU Lille Roger Salengro, France          |                                          |                                                         |                                                                                            |
| Morgan                            | Caplan              |                       |                  | CHRU Lille Roger Salengro, France          |                                          |                                                         |                                                                                            |
| Amélie                            | Cerf                |                       |                  | CHRU Lille Roger Salengro, France          |                                          |                                                         |                                                                                            |

## Supplemental Online Content: Nonauthor Collaborators

\*First name, last name, and suffix (if applicable) are required and will appear in PubMed.

| *First Name and Middle Initial(s) | *Last Name   | *Suffix (eg, Jr, III) | Academic Degrees | Institution                       | Location (city, state/province, country) | Role or Contribution, eg, chair, principal investigator | Group (if more than 1 Group listed in the byline) and/or Subgroup (eg, Steering Committee) |
|-----------------------------------|--------------|-----------------------|------------------|-----------------------------------|------------------------------------------|---------------------------------------------------------|--------------------------------------------------------------------------------------------|
| Nicolas                           | Cousin       |                       |                  | CHRU Lille Roger Salengro, France |                                          |                                                         |                                                                                            |
| Marie                             | Cuvelliez    |                       |                  | CHRU Lille Roger Salengro, France |                                          |                                                         |                                                                                            |
| Claire                            | Delcourte    |                       |                  | CHRU Lille Roger Salengro, France |                                          |                                                         |                                                                                            |
| Arthur                            | Durand       |                       |                  | CHRU Lille Roger Salengro, France |                                          |                                                         |                                                                                            |
| Raphaël                           | Favory       |                       |                  | CHRU Lille Roger Salengro, France |                                          |                                                         |                                                                                            |
| Ahmed                             | El Kalioubie |                       |                  | CHRU Lille Roger Salengro, France |                                          |                                                         |                                                                                            |
| Myrtille                          | Gaudel       |                       |                  | CHRU Lille Roger Salengro, France |                                          |                                                         |                                                                                            |
| Alexandre                         | Gaudet       |                       |                  | CHRU Lille Roger Salengro, France |                                          |                                                         |                                                                                            |
| Julien                            | Goutay       |                       |                  | CHRU Lille Roger Salengro, France |                                          |                                                         |                                                                                            |
| Marion                            | Houard       |                       |                  | CHRU Lille Roger Salengro, France |                                          |                                                         |                                                                                            |
| Emmanuelle                        | Jaillette    |                       |                  | CHRU Lille Roger Salengro, France |                                          |                                                         |                                                                                            |
| Mercé                             | Jourdain     |                       |                  | CHRU Lille Roger Salengro, France |                                          |                                                         |                                                                                            |
| Geoffrey                          | Ledoux       |                       |                  | CHRU Lille Roger Salengro, France |                                          |                                                         |                                                                                            |
| Laure                             | Mariller     |                       |                  | CHRU Lille Roger Salengro, France |                                          |                                                         |                                                                                            |
| Guillaume                         | Millot       |                       |                  | CHRU Lille Roger Salengro, France |                                          |                                                         |                                                                                            |
| Anne-Sophie                       | Moreau       |                       |                  | CHRU Lille Roger Salengro, France |                                          |                                                         |                                                                                            |
| Christopher                       | Niles        |                       |                  | CHRU Lille Roger Salengro, France |                                          |                                                         |                                                                                            |
| Saad                              | Nseir        |                       |                  | CHRU Lille Roger Salengro, France |                                          |                                                         |                                                                                            |
| Thierry                           | Onimus       |                       |                  | CHRU Lille Roger Salengro, France |                                          |                                                         |                                                                                            |
| Sébastien                         | Preau        |                       |                  | CHRU Lille Roger Salengro, France |                                          |                                                         |                                                                                            |
| Aurélie                           | Roucou       |                       |                  | CHRU Lille Roger Salengro, France |                                          |                                                         |                                                                                            |
| Anahita                           | Rouze        |                       |                  | CHRU Lille Roger Salengro, France |                                          |                                                         |                                                                                            |
| Ouriel                            | Saura        |                       |                  | CHRU Lille Roger Salengro, France |                                          |                                                         |                                                                                            |
| Arthur                            | Simonnet     |                       |                  | CHRU Lille Roger Salengro, France |                                          |                                                         |                                                                                            |
| Romain                            | Tortuyaux    |                       |                  | CHRU Lille Roger Salengro, France |                                          |                                                         |                                                                                            |
| Hamid                             | Merdji       |                       |                  | CHU Strasbourg, France            |                                          |                                                         |                                                                                            |
| Hayat                             | Allam        |                       |                  | CHU Strasbourg, France            |                                          |                                                         |                                                                                            |
| Jessy                             | Cattelan     |                       |                  | CHU Strasbourg, France            |                                          |                                                         |                                                                                            |
| Raphaël                           | Clere-Jehl   |                       |                  | CHU Strasbourg, France            |                                          |                                                         |                                                                                            |
| Julie                             | Helms        |                       |                  | CHU Strasbourg, France            |                                          |                                                         |                                                                                            |
| Kévin                             | Hilt         |                       |                  | CHU Strasbourg, France            |                                          |                                                         |                                                                                            |

## Supplemental Online Content: Nonauthor Collaborators

\*First name, last name, and suffix (if applicable) are required and will appear in PubMed.

| *First Name and Middle Initial(s) | *Last Name       | *Suffix (eg, Jr, III) | Academic Degrees | Institution                    | Location (city, state/province, country) | Role or Contribution, eg, chair, principal investigator | Group (if more than 1 Group listed in the byline) and/or Subgroup (eg, Steering Committee) |
|-----------------------------------|------------------|-----------------------|------------------|--------------------------------|------------------------------------------|---------------------------------------------------------|--------------------------------------------------------------------------------------------|
| Anne                              | Hutt-Clauss      |                       |                  | CHU Strasbourg, France         |                                          |                                                         |                                                                                            |
| Christine                         | Kummerlen        |                       |                  | CHU Strasbourg, France         |                                          |                                                         |                                                                                            |
| Ferhat                            | Meziani          |                       |                  | CHU Strasbourg, France         |                                          |                                                         |                                                                                            |
| Alexandra                         | Monnier          |                       |                  | CHU Strasbourg, France         |                                          |                                                         |                                                                                            |
| Hassène                           | Rahmani          |                       |                  | CHU Strasbourg, France         |                                          |                                                         |                                                                                            |
| Antoine                           | Studer           |                       |                  | CHU Strasbourg, France         |                                          |                                                         |                                                                                            |
| Leonie                            | Thiebaut         |                       |                  | CHU Strasbourg, France         |                                          |                                                         |                                                                                            |
| Aurélie                           | Han Hew Wai      |                       |                  | Hopital Foch, Suresnes, France |                                          |                                                         |                                                                                            |
| Charles                           | Cerf             |                       |                  | Hopital Foch, Suresnes, France |                                          |                                                         |                                                                                            |
| David                             | Cortier          |                       |                  | Hopital Foch, Suresnes, France |                                          |                                                         |                                                                                            |
| Jérôme                            | Devaquet         |                       |                  | Hopital Foch, Suresnes, France |                                          |                                                         |                                                                                            |
| Dimitri                           | Fremont          |                       |                  | Hopital Foch, Suresnes, France |                                          |                                                         |                                                                                            |
| Richard                           | Galliot          |                       |                  | Hopital Foch, Suresnes, France |                                          |                                                         |                                                                                            |
| Fabienne                          | Juster           |                       |                  | Hopital Foch, Suresnes, France |                                          |                                                         |                                                                                            |
| Mathilde                          | Le Marchand      |                       |                  | Hopital Foch, Suresnes, France |                                          |                                                         |                                                                                            |
| Lucie                             | Le Meur          |                       |                  | Hopital Foch, Suresnes, France |                                          |                                                         |                                                                                            |
| Mathilde                          | Neuville         |                       |                  | Hopital Foch, Suresnes, France |                                          |                                                         |                                                                                            |
| Emmanuel                          | Roux             |                       |                  | Hopital Foch, Suresnes, France |                                          |                                                         |                                                                                            |
| Guillaume                         | Tachon           |                       |                  | Hopital Foch, Suresnes, France |                                          |                                                         |                                                                                            |
| Camille                           | Vassord-Dang     |                       |                  | Hopital Foch, Suresnes, France |                                          |                                                         |                                                                                            |
| Benjamin                          | Zuber            |                       |                  | Hopital Foch, Suresnes, France |                                          |                                                         |                                                                                            |
| Cédric                            | Bruel            |                       |                  | Paris- GH Saint Joseph         |                                          |                                                         |                                                                                            |
| Marie-José                        | Aroulanda        |                       |                  | Paris- GH Saint Joseph         |                                          |                                                         |                                                                                            |
| Bryan                             | Berthet-Delteil  |                       |                  | Paris- GH Saint Joseph         |                                          |                                                         |                                                                                            |
| Juliette                          | Courtiade-Malher |                       |                  | Paris- GH Saint Joseph         |                                          |                                                         |                                                                                            |
| Alix                              | De Chevigny      |                       |                  | Paris- GH Saint Joseph         |                                          |                                                         |                                                                                            |
| Candice                           | Fontaine         |                       |                  | Paris- GH Saint Joseph         |                                          |                                                         |                                                                                            |
| Julien                            | Fournier         |                       |                  | Paris- GH Saint Joseph         |                                          |                                                         |                                                                                            |
| Sonia                             | Garrigou         |                       |                  | Paris- GH Saint Joseph         |                                          |                                                         |                                                                                            |
| Meryam                            | Jardin-Szucs     |                       |                  | Paris- GH Saint Joseph         |                                          |                                                         |                                                                                            |
| François                          | Philippart       |                       |                  | Paris- GH Saint Joseph         |                                          |                                                         |                                                                                            |

## Supplemental Online Content: Nonauthor Collaborators

\*First name, last name, and suffix (if applicable) are required and will appear in PubMed.

| *First Name and Middle Initial(s) | *Last Name    | *Suffix (eg, Jr, III) | Academic Degrees | Institution                             | Location (city, state/province, country) | Role or Contribution, eg, chair, principal investigator | Group (if more than 1 Group listed in the byline) and/or Subgroup (eg, Steering Committee) |
|-----------------------------------|---------------|-----------------------|------------------|-----------------------------------------|------------------------------------------|---------------------------------------------------------|--------------------------------------------------------------------------------------------|
| Sophie                            | Renet         |                       |                  | Paris- GH Saint Joseph                  |                                          |                                                         |                                                                                            |
| Emmanuelle                        | Sacco         |                       |                  | Paris- GH Saint Joseph                  |                                          |                                                         |                                                                                            |
| Marc                              | Tran          |                       |                  | Paris- GH Saint Joseph                  |                                          |                                                         |                                                                                            |
| Christophe                        | Guitton       |                       |                  | CH Le Mans, France                      |                                          |                                                         |                                                                                            |
| Delphine                          | Bolle         |                       |                  | CH Le Mans, France                      |                                          |                                                         |                                                                                            |
| Jean-Christophe                   | Callahan      |                       |                  | CH Le Mans, France                      |                                          |                                                         |                                                                                            |
| Nicolas                           | Chudeau       |                       |                  | CH Le Mans, France                      |                                          |                                                         |                                                                                            |
| Cédric                            | Darreau       |                       |                  | CH Le Mans, France                      |                                          |                                                         |                                                                                            |
| Séverine                          | Guillarme     |                       |                  | CH Le Mans, France                      |                                          |                                                         |                                                                                            |
| Mickael                           | Landais       |                       |                  | CH Le Mans, France                      |                                          |                                                         |                                                                                            |
| Laurent                           | Latrouite     |                       |                  | CH Le Mans, France                      |                                          |                                                         |                                                                                            |
| Charlène                          | Le Moal       |                       |                  | CH Le Mans, France                      |                                          |                                                         |                                                                                            |
| Eliott                            | Lebasnier     |                       |                  | CH Le Mans, France                      |                                          |                                                         |                                                                                            |
| Marie-Hélène                      | Leroyer       |                       |                  | CH Le Mans, France                      |                                          |                                                         |                                                                                            |
| Rémy                              | Marnai        |                       |                  | CH Le Mans, France                      |                                          |                                                         |                                                                                            |
| Juliette                          | Meunier       |                       |                  | CH Le Mans, France                      |                                          |                                                         |                                                                                            |
| Catherine                         | Naveau        |                       |                  | CH Le Mans, France                      |                                          |                                                         |                                                                                            |
| Marjorie                          | Saint-Martin  |                       |                  | CH Le Mans, France                      |                                          |                                                         |                                                                                            |
| Alain                             | Robert        |                       |                  | CH Le Mans, France                      |                                          |                                                         |                                                                                            |
| Patrice                           | Tirot         |                       |                  | CH Le Mans, France                      |                                          |                                                         |                                                                                            |
| Carole                            | Schwebel      |                       |                  | CHU Albert Michallon, La Tronche France |                                          |                                                         |                                                                                            |
| Joanna                            | Bougnaud      |                       |                  | CHU Albert Michallon, La Tronche France |                                          |                                                         |                                                                                            |
| Clara                             | Candille      |                       |                  | CHU Albert Michallon, La Tronche France |                                          |                                                         |                                                                                            |
| Roselyne                          | Collomb-Muret |                       |                  | CHU Albert Michallon, La Tronche France |                                          |                                                         |                                                                                            |
| Charlotte                         | Cordier       |                       |                  | CHU Albert Michallon, La Tronche France |                                          |                                                         |                                                                                            |
| Louis-Marie                       | Galerieau     |                       |                  | CHU Albert Michallon, La Tronche France |                                          |                                                         |                                                                                            |
| Côme                              | Gerard        |                       |                  | CHU Albert Michallon, La Tronche France |                                          |                                                         |                                                                                            |
| Pierre                            | Nicolas       |                       |                  | CHU Albert Michallon, La Tronche France |                                          |                                                         |                                                                                            |
| Amel                              | Refes         |                       |                  | CHU Albert Michallon, La Tronche France |                                          |                                                         |                                                                                            |
| Guillaume                         | Rigault       |                       |                  | CHU Albert Michallon, La Tronche France |                                          |                                                         |                                                                                            |
| Florian                           | Sigaud        |                       |                  | CHU Albert Michallon, La Tronche France |                                          |                                                         |                                                                                            |

## Supplemental Online Content: Nonauthor Collaborators

\*First name, last name, and suffix (if applicable) are required and will appear in PubMed.

| *First Name and Middle Initial(s) | *Last Name  | *Suffix (eg, Jr, III) | Academic Degrees | Institution                                   | Location (city, state/province, country) | Role or Contribution, eg, chair, principal investigator | Group (if more than 1 Group listed in the byline) and/or Subgroup (eg, Steering Committee) |
|-----------------------------------|-------------|-----------------------|------------------|-----------------------------------------------|------------------------------------------|---------------------------------------------------------|--------------------------------------------------------------------------------------------|
| Nicolas                           | Terzi       |                       |                  | CHU Albert Michallon, La Tronche France       |                                          |                                                         |                                                                                            |
| Ester                             | Terzi       |                       |                  | CHU Albert Michallon, La Tronche France       |                                          |                                                         |                                                                                            |
| Emmanuelle                        | Turbil      |                       |                  | CHU Albert Michallon, La Tronche France       |                                          |                                                         |                                                                                            |
| Yann                              | Vallod      |                       |                  | CHU Albert Michallon, La Tronche France       |                                          |                                                         |                                                                                            |
| Claire                            | Dupuis      |                       |                  | CHU Gabriel Montpied Clermont-Ferrand, France |                                          |                                                         |                                                                                            |
| Mireille                          | Adda        |                       |                  | CHU Gabriel Montpied Clermont-Ferrand, France |                                          |                                                         |                                                                                            |
| Claire                            | Bachelier   |                       |                  | CHU Gabriel Montpied Clermont-Ferrand, France |                                          |                                                         |                                                                                            |
| Marine                            | Bereiziat   |                       |                  | CHU Gabriel Montpied Clermont-Ferrand, France |                                          |                                                         |                                                                                            |
| Lise                              | Bernard     |                       |                  | CHU Gabriel Montpied Clermont-Ferrand, France |                                          |                                                         |                                                                                            |
| Radhia                            | Bouzgarrou  |                       |                  | CHU Gabriel Montpied Clermont-Ferrand, France |                                          |                                                         |                                                                                            |
| Laure                             | Calvet      |                       |                  | CHU Gabriel Montpied Clermont-Ferrand, France |                                          |                                                         |                                                                                            |
| Pierre                            | Couhault    |                       |                  | CHU Gabriel Montpied Clermont-Ferrand, France |                                          |                                                         |                                                                                            |
| Elisabeth                         | Coupez      |                       |                  | CHU Gabriel Montpied Clermont-Ferrand, France |                                          |                                                         |                                                                                            |
| Frédéric                          | Duee        |                       |                  | CHU Gabriel Montpied Clermont-Ferrand, France |                                          |                                                         |                                                                                            |
| Armelle                           | Gilard      |                       |                  | CHU Gabriel Montpied Clermont-Ferrand, France |                                          |                                                         |                                                                                            |
| Tiphaine                          | Girard      |                       |                  | CHU Gabriel Montpied Clermont-Ferrand, France |                                          |                                                         |                                                                                            |
| Kévin                             | Grapin      |                       |                  | CHU Gabriel Montpied Clermont-Ferrand, France |                                          |                                                         |                                                                                            |
| Francis                           | Kinda       |                       |                  | CHU Gabriel Montpied Clermont-Ferrand, France |                                          |                                                         |                                                                                            |
| Guillaume                         | Laurichesse |                       |                  | CHU Gabriel Montpied Clermont-Ferrand, France |                                          |                                                         |                                                                                            |
| Jean-Mathias                      | Liteaudon   |                       |                  | CHU Gabriel Montpied Clermont-Ferrand, France |                                          |                                                         |                                                                                            |
| Bertrand                          | Souweine    |                       |                  | CHU Gabriel Montpied Clermont-Ferrand, France |                                          |                                                         |                                                                                            |
| François                          | Thouy       |                       |                  | CHU Gabriel Montpied Clermont-Ferrand, France |                                          |                                                         |                                                                                            |
| Mehdi                             | Marzouk     |                       |                  | CH de Béthune, Bethune France                 |                                          |                                                         |                                                                                            |
| Hervé                             | Declercq    |                       |                  | CH de Béthune, Bethune France                 |                                          |                                                         |                                                                                            |
| Dominique                         | Descamps    |                       |                  | CH de Béthune, Bethune France                 |                                          |                                                         |                                                                                            |
| Anne                              | Dewatine    |                       |                  | CH de Béthune, Bethune France                 |                                          |                                                         |                                                                                            |
| Sabine                            | Janowski    |                       |                  | CH de Béthune, Bethune France                 |                                          |                                                         |                                                                                            |
| Catherine                         | Senis       |                       |                  | CH de Béthune, Bethune France                 |                                          |                                                         |                                                                                            |
| Christophe                        | Vinsonneau  |                       |                  | CH de Béthune, Bethune France                 |                                          |                                                         |                                                                                            |
| Eric                              | Kipnis      |                       |                  | CHRU de Lille, Surgical ICU, France           |                                          |                                                         |                                                                                            |
| Anne                              | Bignon      |                       |                  | CHRU de Lille, Surgical ICU, France           |                                          |                                                         |                                                                                            |

## Supplemental Online Content: Nonauthor Collaborators

\*First name, last name, and suffix (if applicable) are required and will appear in PubMed.

| *First Name and Middle Initial(s) | *Last Name        | *Suffix (eg, Jr, III) | Academic Degrees | Institution                                  | Location (city, state/province, country) | Role or Contribution, eg, chair, principal investigator | Group (if more than 1 Group listed in the byline) and/or Subgroup (eg, Steering Committee) |
|-----------------------------------|-------------------|-----------------------|------------------|----------------------------------------------|------------------------------------------|---------------------------------------------------------|--------------------------------------------------------------------------------------------|
| Tchadie                           | Bommenel          |                       |                  | CHRU de Lille, Surgical ICU, France          |                                          |                                                         |                                                                                            |
| Sylvie                            | Brice             |                       |                  | CHRU de Lille, Surgical ICU, France          |                                          |                                                         |                                                                                            |
| Claude                            | Huriez            |                       |                  | CHRU de Lille, Surgical ICU, France          |                                          |                                                         |                                                                                            |
| Matthieu                          | Duprey            |                       |                  | GHEF Jossigny, Marne La vallée, France       |                                          |                                                         |                                                                                            |
| Pierre                            | Garcon            |                       |                  | GHEF Jossigny, Marne La vallée, France       |                                          |                                                         |                                                                                            |
| Afef                              | Hammami           |                       |                  | GHEF Jossigny, Marne La vallée, France       |                                          |                                                         |                                                                                            |
| Andréa                            | Issad             |                       |                  | GHEF Jossigny, Marne La vallée, France       |                                          |                                                         |                                                                                            |
| Marie-Odile                       | Jaccod-Deneuville |                       |                  | GHEF Jossigny, Marne La vallée, France       |                                          |                                                         |                                                                                            |
| Safaâ                             | Kachmar           |                       |                  | GHEF Jossigny, Marne La vallée, France       |                                          |                                                         |                                                                                            |
| Ly                                | Van-Vong          |                       |                  | GHEF Jossigny, Marne La vallée, France       |                                          |                                                         |                                                                                            |
| Jonathan                          | Zarka             |                       |                  | GHEF Jossigny, Marne La vallée, France       |                                          |                                                         |                                                                                            |
| Bruno                             | Megarbane         |                       |                  | APHP Hopital Lariboisiere, Paris, France     |                                          |                                                         |                                                                                            |
| Nicolas                           | Deye              |                       |                  | APHP Hopital Lariboisiere, Paris, France     |                                          |                                                         |                                                                                            |
| Aude                              | Jacob             |                       |                  | APHP Hopital Lariboisiere, Paris, France     |                                          |                                                         |                                                                                            |
| Isabelle                          | Malissin          |                       |                  | APHP Hopital Lariboisiere, Paris, France     |                                          |                                                         |                                                                                            |
| Aymen                             | M'Rad             |                       |                  | APHP Hopital Lariboisiere, Paris, France     |                                          |                                                         |                                                                                            |
| Sebastian                         | Voicu             |                       |                  | APHP Hopital Lariboisiere, Paris, France     |                                          |                                                         |                                                                                            |
| Guillaume                         | Geri              |                       |                  | APHP, Hopital Ambroise Paré, Boulogne France |                                          |                                                         |                                                                                            |
| Hélène                            | Chambrin-Lauvray  |                       |                  | APHP, Hopital Ambroise Paré, Boulogne France |                                          |                                                         |                                                                                            |
| Ouarda                            | Douache           |                       |                  | APHP, Hopital Ambroise Paré, Boulogne France |                                          |                                                         |                                                                                            |
| Mathieu                           | Godement          |                       |                  | APHP, Hopital Ambroise Paré, Boulogne France |                                          |                                                         |                                                                                            |
| Romain                            | Jouffroy          |                       |                  | APHP, Hopital Ambroise Paré, Boulogne France |                                          |                                                         |                                                                                            |
| Edouard                           | Jullien           |                       |                  | APHP, Hopital Ambroise Paré, Boulogne France |                                          |                                                         |                                                                                            |
| Matthieu                          | Petit             |                       |                  | APHP, Hopital Ambroise Paré, Boulogne France |                                          |                                                         |                                                                                            |
| Antoine                           | Vieillard-Baron   |                       |                  | APHP, Hopital Ambroise Paré, Boulogne France |                                          |                                                         |                                                                                            |
| Alain                             | Cariou            |                       |                  | APHP Cochin Hospital, France                 |                                          | DSMB                                                    |                                                                                            |
| Alexandre                         | Boyer             |                       |                  | CHU de Bordeaux, France                      |                                          | DSMB                                                    |                                                                                            |
| Patricia                          | Pavese            |                       |                  | CHU de Grenoble, France                      |                                          | DSMB                                                    |                                                                                            |
| Bruno                             | Giraudeau         |                       |                  | CHU de Tours                                 |                                          | DSMB                                                    |                                                                                            |
