# Supplementary material
Source: PubMed Central journal article supplement (PMC9449796)
Supplement: jamainternmed-e222168-s004.pdf [file jamainternmed-e222168-s004.pdf]

## Data Sharing Statement

Bouadma. High-Dose Dexamethasone and Oxygen Support Strategies in Intensive Care Unit Patients With Severe COVID-19 Acute Hypoxemic Respiratory Failure. *JAMA Intern Med*. Published July 05, 2022. doi:10.1001/jamainternmed.2022.2168

### Data

**Data available:** Yes

**Data types:** Deidentified participant data

**How to access data:** will be available upon reasonable request directly to the PI (Prof JF Timsit last author)

**When available:** With publication

### Supporting Documents

**Document types:** Statistical/analytic code, Informed consent form, Other (please specify)

**Additional Information:** the original protocol, amendment, statistical analysis plan are enclosed in the supplemental material of the submitted manuscript.

**How to access documents:** all the documents are enclosed in the supplemental material with the manuscript.

**When available:** With publication

### Additional Information

**Who can access the data:** upon reasonable request from one researcher to the PI

**Types of analyses:** research purpose

**Mechanisms of data availability:** after approval of a proposal with a signed data access agreement.
